# Supplementary material for: Palladium-catalyzed bisarylation of 3-alkylbenzofurans to 3-arylalkyl-2-arylbenzofurans on water: tandem C(sp3)–H and C(sp2)–H activation reactions of 3-alkylbenzofurans
Source: Royal Society of Chemistry journal article supplement (doi:10.1039/c5cc04052c), 2015-01-01
Supplement: c5cc04052c1.pdf [file c5cc04052c1.pdf]

## Supporting Information

### **Palladium-Catalyzed Bisarylation of 3-Alkylbenzofurans to 3-Arylalkyl-2-arylbenzofurans on Water: Tandem C(sp<sup>3</sup>)-H and C(sp<sup>2</sup>)-H Activations of 3-Alkylbenzofurans**

Beom Shin Cho and Young Keun Chung\*

Department of Chemistry, College of Natural Sciences, Seoul National University, Seoul 151-747, Korea

#### Table of contents

|                                                                             |     |
|-----------------------------------------------------------------------------|-----|
| General information                                                         | S2  |
| Optimization studies of Pd-catalyzed bisarylation                           | S3  |
| Figure of changes in yield of compounds as a function of time               | S4  |
| Starting material                                                           | S5  |
| General procedure for palladium-catalyzed bisarylation of 3-alkylbenzofuran | S7  |
| Kinetic isotope effect                                                      | S19 |
| X-ray analysis                                                              | S24 |
| <sup>1</sup> H and <sup>13</sup> C NMR Spectra of compounds                 | S31 |
| References                                                                  | S71 |

## ● General Information

All reactions for preparation of novel compounds were conducted under nitrogen using standard Schlenk-type flasks.  $^1\text{H}$  and  $^{13}\text{C}$  NMR spectra were recorded with Agilent 400-MR DD2 (400 MHz and 100 MHz, respectively) spectrometer.  $^1\text{H}$  NMR spectra were taken in  $\text{CDCl}_3$  and were referenced to residual TMS (0 ppm) and reported as follows: chemical shift, multiplicity (s = singlet, d = doublet, t = triplet, dd = doublet of doublet, m = multiplet). Chemical shifts of the  $^{13}\text{C}$  NMR spectra were measured relative to  $\text{CDCl}_3$  (77.16 ppm). High-Resolution Mass Spectra were obtained using the electronic impact (EI) mode at the Korea Basic Science Institute (Daegu, South Korea) on a Jeol JMS 700 high resolution mass spectrometer using a magnetic sector-electric sector focusing mass analyzer. IR spectra were measured on a Thermo Scientific Nicolet 6700 spectrometer. Reactions were monitored by thin-layer chromatography on 0.25 mm E. Merck silica gel plates (60F-254). The TLC plates were visualized by UV-light (254 nm). Workup procedures were done in air. Flash column chromatography was carried out on Merck 60 silica gel (230 – 400 mesh).

● Table s1. Optimization studies of Pd-catalyzed bisarylation.

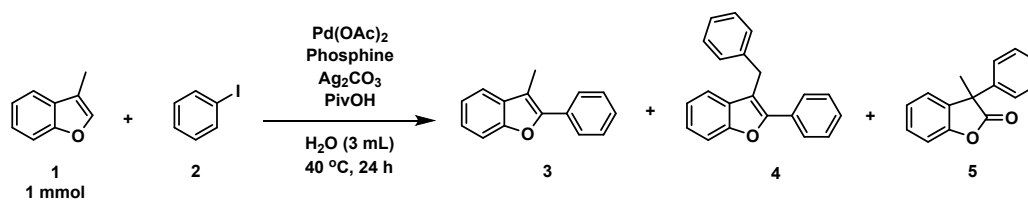

| Entry           | $\text{Pd}(\text{OAc})_2$<br>(mol%) | 2<br>(mmol) | Phosphine<br>(mol%)           | $\text{Ag}_2\text{CO}_3$<br>(mmol) | PivOH<br>(mmol) | Yield [%] <sup>a</sup><br>3:4:5 |
|-----------------|-------------------------------------|-------------|-------------------------------|------------------------------------|-----------------|---------------------------------|
| 1               | 5                                   | 2           | -                             | 1                                  | 4               | 41:23:28                        |
| 2               | 10                                  | 2           | -                             | 1                                  | 4               | 30:27:33                        |
| 3               | 10                                  | 2           | -                             | 1.5                                | 4               | 16:34:16                        |
| 4               | 10                                  | 2           | -                             | 1.5                                | 2               | 12:42:16                        |
| 5               | 10                                  | 2           | -                             | 1.5                                | 1               | 9:47:12                         |
| 6               | 10                                  | 3           | -                             | 1.5                                | 1               | 30:40:14                        |
| 7               | 10                                  | 4           | -                             | 1.5                                | 1               | 12:42:14                        |
| 8               | 10                                  | 2           | $\text{PCy}_3$ <sub>20</sub>  | 1.5                                | 1               | 3:60:10                         |
| 9               | 10                                  | 2           | $\text{PPh}_3$ <sub>20</sub>  | 1.5                                | 1               | N.R.                            |
| 10              | 10                                  | 2           | $\text{PtBu}_3$ <sub>20</sub> | 1.5                                | 1               | trace                           |
| 11 <sup>b</sup> | 10                                  | 2           | $\text{PCy}_3$ <sub>20</sub>  | 1.5                                | 1               | 15:35:17                        |
| 12 <sup>c</sup> | 10                                  | 2           | $\text{PCy}_3$ <sub>20</sub>  | 1.5                                | 1               | trace:58:10                     |
| 13 <sup>d</sup> | 10                                  | 2           | $\text{PCy}_3$ <sub>20</sub>  | 1.5                                | 1               | trace:64:10                     |
| 14 <sup>e</sup> | 10                                  | 2           | $\text{PCy}_3$ <sub>20</sub>  | 1.5                                | 1               | trace:71:8                      |
| 15 <sup>f</sup> | 10                                  | 2           | $\text{PCy}_3$ <sub>20</sub>  | 1.5                                | 1               | trace:85:9                      |

<sup>a</sup>Isolated yields. <sup>b</sup>Runs at 60 °C. <sup>c</sup>Runs at room temperature. <sup>d</sup>30 h. <sup>e</sup>40 h. <sup>f</sup> $\text{Pd}(\text{OAc})_2$  and  $\text{PCy}_3$  were pre-stirred for 30 min.

## ● Changes in yield of **4** and **5** as a function of time

With the optimized reaction conditions, yields of bisarylated product **4** and lactone **5** are plotted as a function of time. No monoarylated product **3** was observed in the reaction. The yield of bisarylated product rapidly increased within 5 h and then continuously increased to 90%. However, the yield of lactone reached at its highest point (7%) within 5 h and then increased no more.

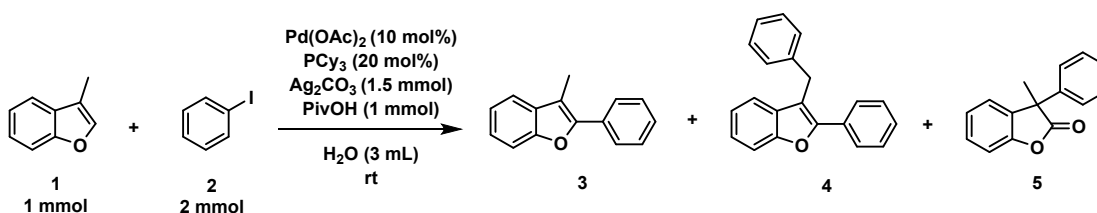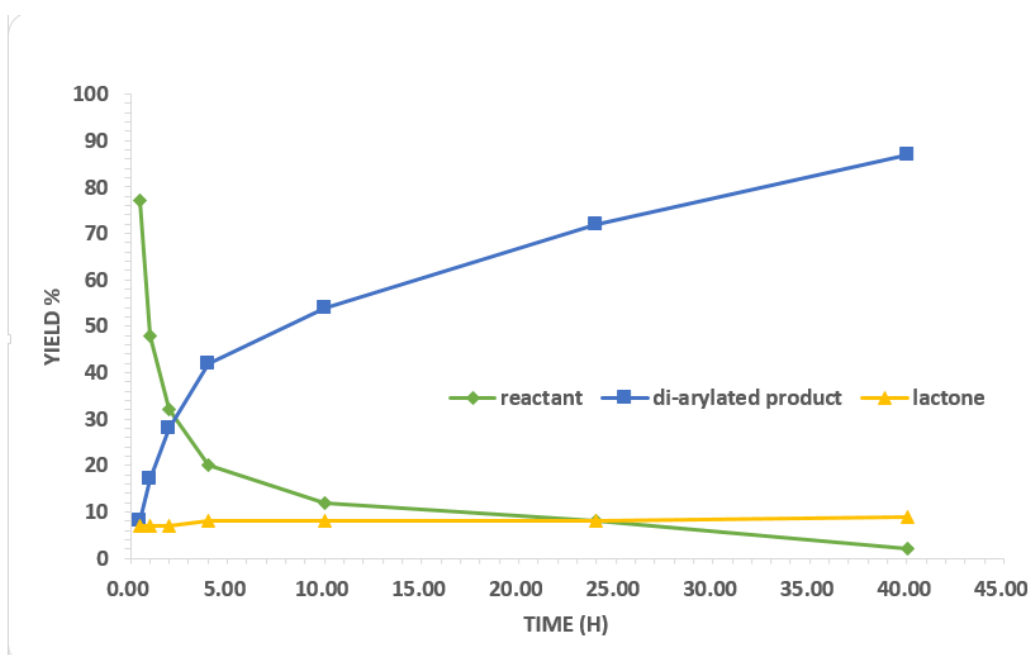

Figure S1. Changes in yield of **4** and **5** as a function of time

### ● Starting materials

Compound **3**, **15**, **17**, **20**, **24**, **26**, **29** were prepared according to literature procedures.<sup>1</sup>  
Compound **1** were commercially obtained.

#### 3-Methyl-2-phenylbenzofuran (**3**)

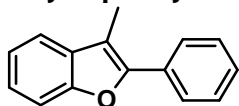

<sup>1</sup>H NMR (400 MHz, CDCl<sub>3</sub>): δ 7.78 (dd, *J* = 8.2, 1.0 Hz, 2H), 7.50 – 7.40 (m, 4H), 7.33 – 7.28 (m, 1H), 7.28 – 7.23 (m, 1H), 7.21 (ddd, *J* = 7.7, 4.3, 1.0 Hz, 1H), 2.42 (s, 3H). <sup>13</sup>C NMR (100 MHz, CDCl<sub>3</sub>): δ 153.89, 150.77, 131.52, 131.27, 128.71, 127.95, 126.80, 124.42, 122.44, 119.38, 111.37, 111.03, 9.56. HRMS(EI+) *m/z*: Calcd for C<sub>15</sub>H<sub>12</sub>O: 208.0888, found: 208.0888.

#### 3-Methylnaphtho[2,3-*b*]furan (**15**)

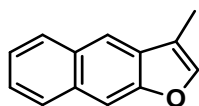

<sup>1</sup>H NMR (400 MHz, CDCl<sub>3</sub>): δ 7.95 (t, *J* = 4.6 Hz, 2H), 7.93 – 7.89 (m, 1H), 7.84 (s, 1H), 7.49 (d, *J* = 1.3 Hz, 1H), 7.46 – 7.39 (m, 2H), 2.32 (d, *J* = 1.4 Hz, 3H). <sup>13</sup>C NMR (100 MHz, CDCl<sub>3</sub>): δ 154.33, 143.68, 131.49, 130.48, 130.26, 128.19, 127.98, 124.92, 124.01, 117.35, 115.31, 106.91, 8.17, m.p : 54°C. HRMS(EI+) *m/z*: Calcd for C<sub>13</sub>H<sub>10</sub>O: 182.0732, found: 182.0732.

#### 3-Ethylbenzofuran (**17**)

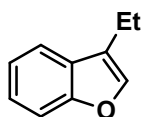

<sup>1</sup>H NMR (400 MHz, CDCl<sub>3</sub>): δ 7.56 – 7.52 (m, 1H), 7.47 – 7.43 (m, 1H), 7.38 (d, *J* = 1.1 Hz, 1H), 7.27 (ddd, *J* = 8.2, 7.3, 1.5 Hz, 1H), 7.22 (ddd, *J* = 7.3, 4.4, 1.2 Hz, 1H), 2.72 – 2.65 (m, 2H), 1.34 – 1.29 (m, 3H). <sup>13</sup>C NMR (100 MHz, CDCl<sub>3</sub>): δ 155.55, 140.67, 128.36, 124.17, 122.44, 122.25, 119.70, 111.52, 17.09, 13.62. HRMS(EI+) *m/z*: Calcd for C<sub>10</sub>H<sub>10</sub>O: 146.0732, found: 146.0729.

#### 3-*n*Butylbenzofuran (**20**)

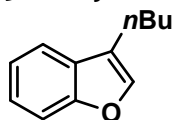

<sup>1</sup>H NMR (400 MHz, CDCl<sub>3</sub>): δ 7.53 – 7.49 (m, 1H), 7.45 – 7.42 (m, 1H), 7.35 – 7.33 (m, 1H), 7.21 (dddd, *J* = 8.7, 5.0, 4.2, 2.3 Hz, 2H), 2.64 – 2.59 (m, 2H), 1.68 – 1.62 (m, 2H), 1.42 – 1.36 (m, 2H), 0.93 (dd, *J* = 7.4, 5.1 Hz, 3H). <sup>13</sup>C NMR (100 MHz, CDCl<sub>3</sub>): δ 155.52, 141.06, 128.52, 124.09, 122.22, 120.74, 119.73, 111.48, 31.30, 23.34, 22.68, 13.99. HRMS(EI+) *m/z*: Calcd for C<sub>12</sub>H<sub>14</sub>O: 174.1045, found: 174.1044

### 3-*i*Proprylbenzofuran (24)

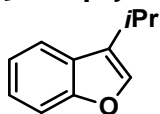

$^1\text{H}$  NMR (400 MHz,  $\text{CDCl}_3$ ):  $\delta$  7.61 – 7.58 (m, 1H), 7.45 (ddd,  $J$  = 8.1, 1.1, 0.6 Hz, 1H), 7.36 (d,  $J$  = 0.9 Hz, 1H), 7.29 – 7.24 (m, 1H), 7.24 – 7.19 (m, 1H), 3.12 – 3.04 (m, 1H), 1.35 (d,  $J$  = 6.9 Hz, 6H).  $^{13}\text{C}$  NMR (100 MHz,  $\text{CDCl}_3$ ):  $\delta$  155.73, 139.81, 127.74, 127.42, 124.09, 122.18, 120.23, 111.63, 24.79, 22.57. HRMS(EI+)  $m/z$ : Calcd for  $\text{C}_{11}\text{H}_{12}\text{O}$ : 160.0888, found: 160.0886.

### 3-Benzylbenzofuran (26)

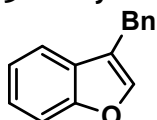

$^1\text{H}$  NMR (400 MHz,  $\text{CDCl}_3$ ):  $\delta$  7.43 (dd,  $J$  = 8.2, 0.6 Hz, 1H), 7.37 (dd,  $J$  = 7.7, 0.7 Hz, 1H), 7.31 (d,  $J$  = 1.0 Hz, 1H), 7.28 – 7.21 (m, 5H), 7.20 – 7.16 (m, 1H), 7.14 (dd,  $J$  = 11.7, 4.1 Hz, 1H), 3.96 (s, 2H).  $^{13}\text{C}$  NMR (100 MHz,  $\text{CDCl}_3$ ):  $\delta$  155.67, 142.23, 139.29, 128.74, 128.61, 128.12, 126.47, 124.33, 122.46, 120.00, 119.80, 111.55, 30.07. HRMS(EI+)  $m/z$ : Calcd for  $\text{C}_{15}\text{H}_{12}\text{O}$ : 208.0888, found: 208.0887.

### 3,6-Dimethylbenzofuran (29)

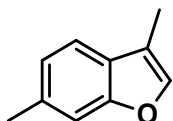

$^1\text{H}$  NMR (400 MHz,  $\text{CDCl}_3$ )  $\delta$  7.48 (d,  $J$  = 7.9 Hz, 1H), 7.41 (d,  $J$  = 0.8 Hz, 1H), 7.36 (s, 1H), 7.16 (d,  $J$  = 7.9 Hz, 1H), 2.56 (s, 3H), 2.30 (d,  $J$  = 1.2 Hz, 3H).  $^{13}\text{C}$  NMR (100 MHz,  $\text{CDCl}_3$ ):  $\delta$  155.80, 140.86, 134.28, 126.66, 123.69, 118.94, 115.51, 111.63, 21.68, 7.96. HRMS(EI+)  $m/z$ : Calcd for  $\text{C}_{10}\text{H}_{10}\text{O}$ : 146.0732, found: 146.0728.

### 6-methoxy-3-methylbenzofuran (31)

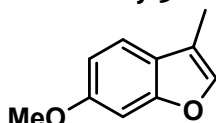

$^1\text{H}$  NMR (400 MHz,  $\text{CDCl}_3$ )  $\delta$  7.30 (d,  $J$  = 8.5 Hz, 1H), 7.24 (d,  $J$  = 0.8 Hz, 1H), 6.91 (d,  $J$  = 2.0 Hz, 1H), 6.80 (dd,  $J$  = 8.5, 2.2 Hz, 1H), 3.77 (s, 3H), 2.13 (d,  $J$  = 0.8 Hz, 3H).  $^{13}\text{C}$  NMR (100 MHz,  $\text{CDCl}_3$ ):  $\delta$  158.09, 156.33, 140.58, 122.60, 119.60, 115.61, 111.35, 96.08, 55.86, 8.08. HRMS(EI+)  $m/z$ : Calcd for  $\text{C}_{10}\text{H}_{10}\text{O}_2$ : 162.0681, found: 162.0683.

● General procedure for palladium-catalyzed bisarylation of 3-alkylbenzofuran

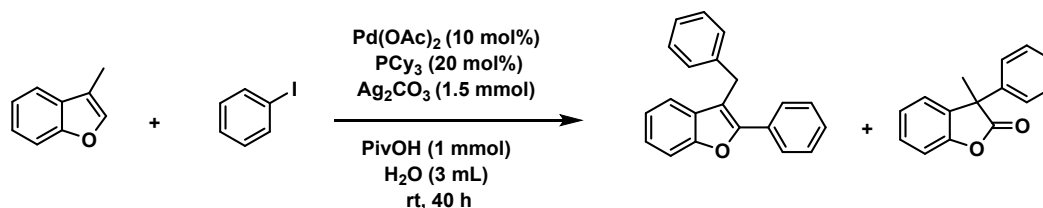

Reactions were performed in a schlenk tube equipped with a stirring bar and capped with a rubber septum. The followings were placed in the tube flask in order: 0.1 mmol of catalyst, 0.2 mmol of phosphine, 2 mmol of iodobenzene, 1.5 mmol of silver carbonate, 1 mmol of pivalic acid, 1 mmol of 3-methylbenzofuran, and 3 mL of deionized water (used without any treatment). The mixture was stirred at room temperature for 40 h. The mixture was extracted with ethyl acetate, filtered to remove catalyst residue, and finally evaporated under reduced pressures. The mixture was purified by flash chromatography on silica gel (*n*-hexane/ethyl acetate) and the product **4**, **5** was obtained with 71%, 8% yield, respectively. When a mixture of  $\text{Pd}(\text{OAc})_2$  and  $\text{PCy}_3$  which was stirred for 30 min was used as catalyst, the product **4**, **5** was obtained with 85%, 9% yield, respectively. The compounds **4** ~ **14** were prepared by both the general procedure and the pre-stirred solution of  $\text{Pd}(\text{OAc})_2$  and  $\text{PCy}_3$  as a catalyst. The compounds **16**, **18~19**, **21~23**, **25**, **27~28**, and **30** were prepared by using the pre-stirred solution of  $\text{Pd}(\text{OAc})_2$  and  $\text{PCy}_3$  as a catalyst.

**3-Benzyl-2-phenylbenzofuran (4).** The desired product was obtained as a colorless oil in 71% yield (0.202 g). When pre-stirred solution was used, the desired product was obtained in 85% yield (0.242 g).

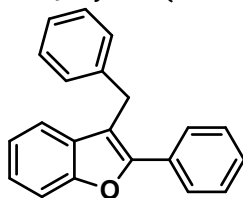

$^1\text{H}$  NMR (400 MHz,  $\text{CDCl}_3$ )  $\delta$  7.74 (d,  $J$  = 8.3 Hz, 2H), 7.50 (d,  $J$  = 8.2 Hz, 1H), 7.39 (dd,  $J$  = 8.2, 7.2 Hz, 2H), 7.34 – 7.29 (m, 2H), 7.28 – 7.22 (m, 5H), 7.13 (t,  $J$  = 7.5 Hz, 2H), 4.28 (s, 2H).  $^{13}\text{C}$  NMR (100 MHz,  $\text{CDCl}_3$ ):  $\delta$  154.24, 152.22, 139.39, 131.00, 130.62, 128.83, 128.75, 128.48, 128.29, 127.05, 126.44, 124.57, 122.69, 120.08, 113.88, 111.19, 30.22. HRMS(EI+)  $m/z$ : Calcd for  $\text{C}_{21}\text{H}_{16}\text{O}$ : 284.1201, found: 284.1198

**3-Methyl-3-phenylbenzofuran-2(3H)-one.** The desired product was obtained as a yellow liquid in 8% yield (0.018 g). When pre-stirred solution was used, the desired product was obtained in 9% yield (0.02 g).

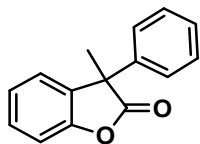

$^1\text{H}$  NMR (400 MHz,  $\text{CDCl}_3$ ):  $\delta$  7.35 – 7.25 (m, 6H), 7.22 – 7.15 (m, 3H), 1.89 (s, 3H).  $^{13}\text{C}$  NMR (100 MHz,  $\text{CDCl}_3$ ):  $\delta$  178.76, 152.77, 139.53, 132.69, 129.09, 128.87, 127.92, 126.53, 124.63, 124.61, 111.05, 50.92, 24.86. HRMS(EI+)  $m/z$ : Calcd for  $\text{C}_{15}\text{H}_{12}\text{O}_2$ : 224.0837, found: 224.0835. IR (neat): 1801.47  $\text{cm}^{-1}$  (C=O).

**3-(4-Methylbenzyl)-2-(p-tolyl)benzofuran (5).** The desired product was obtained as a colorless oil in 58% yield (0.181 g). When pre-stirred solution was used, the desired product was obtained in 72% yield (0.225 g).

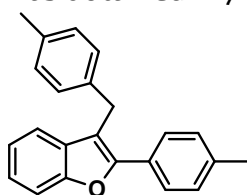

$^1\text{H}$  NMR (400 MHz,  $\text{CDCl}_3$ ):  $\delta$  7.64 (d,  $J$  = 8.2 Hz, 2H), 7.48 (d,  $J$  = 6.6 Hz, 1H), 7.33 – 7.30 (m, 1H), 7.24 – 7.18 (m, 3H), 7.15 – 7.11 (m, 3H), 7.05 (d,  $J$  = 7.8 Hz, 2H), 4.21 (s, 2H), 2.34 (s, 3H), 2.27 (s, 3H).  $^{13}\text{C}$  NMR (100 MHz,  $\text{CDCl}_3$ ):  $\delta$  154.13, 152.34, 138.40, 136.39, 135.82, 129.52, 129.40, 128.15, 126.94, 124.28, 122.58, 119.95, 113.45, 111.07, 29.79, 21.45, 21.13. HRMS(EI+)  $m/z$ : Calcd for  $\text{C}_{23}\text{H}_{20}\text{O}$ : 312.1514, found: 312.1512.

**3-Methyl-3-(p-tolyl)benzofuran-2(3H)-one.** The desired product was obtained as a yellow liquid in 8% yield (0.019 g). When pre-stirred solution was used, the desired product was obtained in 9% yield (0.021 g).

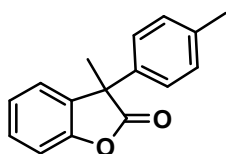

$^1\text{H}$  NMR (400 MHz,  $\text{CDCl}_3$ ):  $\delta$  7.35 – 7.30 (m, 1H), 7.23 – 7.10 (m, 7H), 2.30 (s, 3H), 1.87 (s, 3H).  $^{13}\text{C}$  NMR (100 MHz,  $\text{CDCl}_3$ ):  $\delta$  178.97, 152.83, 137.76, 136.65, 132.93, 129.59, 129.03, 126.45, 124.60, 111.06, 50.66, 24.86, 21.06. HRMS(EI+)  $m/z$ : Calcd for  $\text{C}_{16}\text{H}_{14}\text{O}_2$ : 238.0994, found: 238.0994. IR (neat): 1805.09  $\text{cm}^{-1}$  (C=O).

**3-(3,5-Dimethylbenzyl)-2-(3,5-dimethylphenyl)benzofuran (6).** The desired product was obtained as a colorless oil in 79% yield (0.269 g). When pre-stirred solution was used, the



desired product was obtained in 90% yield (0.306 g).

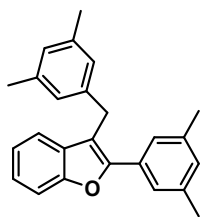

$^1\text{H}$  NMR (400 MHz,  $\text{CDCl}_3$ ):  $\delta$  7.51 – 7.47 (m, 1H), 7.39 (d,  $J$  = 0.5 Hz, 2H), 7.36 (ddd,  $J$  = 7.7, 1.3, 0.7 Hz, 1H), 7.26 – 7.22 (m, 1H), 7.16 – 7.11 (m, 1H), 6.97 (d,  $J$  = 0.6 Hz, 1H), 6.88 (s, 2H), 6.82 (s, 1H), 4.19 (s, 2H), 2.31 (d,  $J$  = 0.5 Hz, 6H), 2.22 (d,  $J$  = 0.5 Hz, 6H).  $^{13}\text{C}$  NMR (100 MHz,  $\text{CDCl}_3$ ):  $\delta$  154.12, 152.38, 139.67, 138.28, 138.12, 130.91, 130.89, 130.19, 128.04, 126.22, 124.91, 124.29, 122.57, 120.12, 114.09, 111.05, 30.24, 21.51, 21.44. HRMS(EI+)  $m/z$ : Calcd for  $\text{C}_{25}\text{H}_{24}\text{O}$ : 340.1827, found: 340.1827.

**3-(3,5-Dimethylphenyl)-3-methylbenzofuran-2(3H)-one.** The desired product was obtained as a yellow liquid in 2% yield (0.005 g). When pre-stirred solution was used, the desired product was obtained in 8% yield (0.02 g).

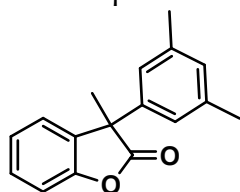

$^1\text{H}$  NMR (400 MHz,  $\text{CDCl}_3$ ):  $\delta$  7.34 – 7.30 (m, 1H), 7.18 (ddd,  $J$  = 5.2, 3.3, 1.3 Hz, 3H), 6.91 (s, 3H), 2.26 (s, 6H), 1.87 (s, 3H).  $^{13}\text{C}$  NMR (100 MHz,  $\text{CDCl}_3$ ):  $\delta$  179.04, 152.77, 139.46, 138.46, 133.15, 129.65, 128.95, 124.60, 124.57, 124.27, 111.02, 50.86, 24.72, 21.50. HRMS(EI+)  $m/z$ : Calcd for  $\text{C}_{17}\text{H}_{16}\text{O}_2$ : 252.1150, found: 252.1148. IR (neat): 1803.21  $\text{cm}^{-1}$  (C=O).

**3-(4-Methoxybenzyl)-2-(4-methoxyphenyl)benzofuran (7).** The desired product was obtained as a colorless oil in 32% yield (0.11 g). When pre-stirred solution was used, the desired product was obtained in 28% yield (0.096 g).

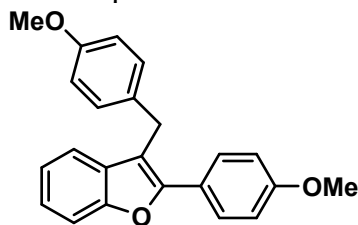

$^1\text{H}$  NMR (400 MHz,  $\text{CDCl}_3$ ):  $\delta$  7.69 – 7.65 (m, 2H), 7.50 – 7.47 (m, 1H), 7.32 (ddd,  $J$  = 7.7, 1.3, 0.7 Hz, 1H), 7.26 – 7.22 (m, 1H), 7.17 – 7.12 (m, 3H), 6.97 – 6.93 (m, 2H), 6.83 – 6.79 (m, 2H), 4.20 (s, 2H), 3.82 (d,  $J$  = 0.9 Hz, 3H), 3.75 (d,  $J$  = 0.9 Hz, 3H).  $^{13}\text{C}$  NMR (100 MHz,  $\text{CDCl}_3$ ):  $\delta$  159.83, 158.20, 154.06, 152.21, 131.55, 130.80, 129.20, 128.47, 124.11, 123.73, 122.58, 119.81,

114.32, 114.13, 112.81, 111.02, 55.47, 55.38, 29.32. HRMS(EI+) m/z: Calcd for C<sub>23</sub>H<sub>20</sub>O<sub>3</sub>: 344.1412, found: 344.1410.

**3-(4-Methoxyphenyl)-3-methylbenzofuran-2(3H)-one.** The desired product was obtained as a yellow liquid in 16% yield (0.041 g). When pre-stirred solution was used, the desired product was obtained in 12% yield (0.031 g).

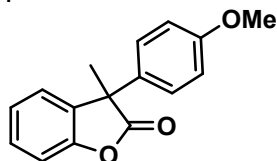

<sup>1</sup>H NMR (400 MHz, CDCl<sub>3</sub>): δ 7.37 – 7.32 (m, 1H), 7.26 – 7.16 (m, 5H), 6.88 – 6.83 (m, 2H), 3.77 (s, 3H), 1.88 (s, 3H). <sup>13</sup>C NMR (100 MHz, CDCl<sub>3</sub>): δ 179.10, 159.27, 152.84, 132.93, 131.62, 129.07, 127.82, 124.63, 114.26, 111.12, 55.47, 55.43, 55.39, 55.37, 50.33, 25.05. HRMS(EI+) m/z: Calcd for C<sub>16</sub>H<sub>14</sub>O<sub>3</sub>: 254.0943, found: 254.0940. IR (neat): 1802.87 cm<sup>-1</sup> (C=O).

**3-(4-Chlorobenzyl)-2-(4-chlorophenyl)benzofuran (8).** The desired product was obtained as a colorless oil in 51% yield (0.181 g). When pre-stirred solution was used, The desired product was obtained in 42% yield (0.149 g).

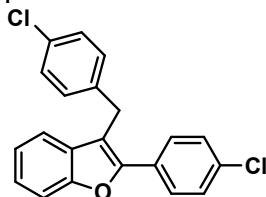

<sup>1</sup>H NMR (400 MHz, CDCl<sub>3</sub>): δ 7.44 – 7.40 (m, 2H), 7.32 (d, J = 8.1 Hz, 1H), 7.18 – 7.14 (m, 2H), 7.11 (ddd, J = 10.7, 5.4, 3.4 Hz, 2H), 7.05 – 7.01 (m, 2H), 7.00 – 6.96 (m, 1H), 6.94 (d, J = 8.4 Hz, 2H), 3.99 (s, 2H). <sup>13</sup>C NMR (100 MHz, CDCl<sub>3</sub>): δ 154.12, 151.03, 137.44, 134.42, 132.29, 130.17, 129.47, 129.17, 129.05, 128.87, 128.02, 124.95, 122.92, 119.87, 113.79, 111.25, 29.46. HRMS(EI+) m/z: Calcd for C<sub>21</sub>H<sub>14</sub>Cl<sub>2</sub>O: 352.0422, found: 352.0422.

**3-(4-Chlorophenyl)-3-methylbenzofuran-2(3H)-one.** The desired product was obtained as a yellow liquid in 12% yield (0.031 g). When pre-stirred solution was used, the desired product was obtained in 19% yield (0.05 g).

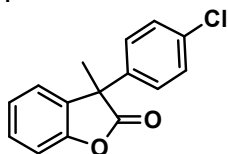

<sup>1</sup>H NMR (400 MHz, CDCl<sub>3</sub>): δ 7.39 – 7.35 (m, 1H), 7.32 – 7.25 (m, 4H), 7.21 (dt, J = 10.8, 3.9 Hz, 3H), 1.88 (s, 3H). <sup>13</sup>C NMR (100 MHz, CDCl<sub>3</sub>): δ 178.43, 152.82, 138.08, 134.13, 132.17, 129.43, 129.08, 128.12, 124.83, 124.61, 111.32, 50.56, 25.11. HRMS(EI+) m/z: Calcd for C<sub>15</sub>H<sub>11</sub>ClO<sub>2</sub>: 258.0448, found: 258.0446. IR (neat): 1802.48 cm<sup>-1</sup> (C=O).

**3-(4-Bromobenzyl)-2-(4-bromophenyl)benzofuran (9).** The desired product was obtained as a white solid in 38% yield (0.169 g). When pre-stirred solution was used, the desired product was obtained in 23% yield (0.101 g). m.p : 130 °C

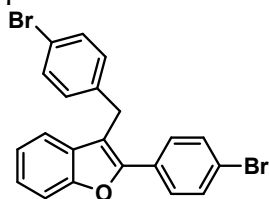

$^1\text{H}$  NMR (400 MHz,  $\text{CDCl}_3$ ):  $\delta$  7.57 – 7.48 (m, 5H), 7.37 (dd,  $J$  = 9.7, 2.6 Hz, 2H), 7.31 – 7.26 (m, 2H), 7.16 (dd,  $J$  = 10.7, 4.3 Hz, 1H), 7.07 (d,  $J$  = 7.9 Hz, 2H), 4.17 (s, 2H).  $^{13}\text{C}$  NMR (100 MHz,  $\text{CDCl}_3$ ):  $\delta$  154.19, 151.17, 137.98, 132.08, 131.89, 130.20, 129.91, 129.67, 128.34, 125.04, 122.99, 122.78, 120.41, 119.92, 113.83, 111.33, 29.63. HRMS(EI+)  $m/z$ : Calcd for  $\text{C}_{21}\text{H}_{14}\text{Br}_2\text{O}$ : 441.9392, found: 441.9393.

**3-(4-Bromophenyl)-3-methylbenzofuran-2(3H)-one.** The desired product was obtained as a yellow liquid in 7% yield (0.022 g). When pre-stirred solution was used, the desired product was obtained in 7% yield (0.022 g).

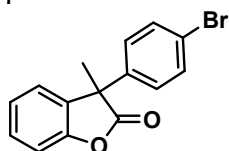

$^1\text{H}$  NMR (400 MHz,  $\text{CDCl}_3$ ):  $\delta$  7.46 (ddd,  $J$  = 4.0, 2.3, 1.2 Hz, 2H), 7.39 – 7.35 (m, 1H), 7.22 – 7.19 (m, 5H), 1.88 (s, 3H).  $^{13}\text{C}$  NMR (100 MHz,  $\text{CDCl}_3$ ):  $\delta$  178.35, 152.86, 138.65, 132.13, 132.07, 129.46, 128.46, 124.84, 124.62, 122.32, 111.35, 50.66, 25.08. HRMS(EI+)  $m/z$ : Calcd for  $\text{C}_{15}\text{H}_{11}\text{BrO}_2$ : 301.9942, found: 301.9943. IR (neat): 1802.86  $\text{cm}^{-1}$  (C=O).

**3-(4-(Trifluoromethyl)benzyl)-2-(4-(trifluoromethyl)phenyl)benzofuran (10).** The desired product was obtained as a white solid in 40% yield (0.169 g). When pre-stirred solution was used, the desired product was obtained in 31% yield (0.131 g). m.p : 113 °C

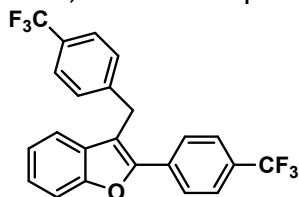

$^1\text{H}$  NMR (400 MHz,  $\text{CDCl}_3$ ):  $\delta$  7.82 – 7.78 (m, 2H), 7.67 (d,  $J$  = 8.7 Hz, 2H), 7.56 – 7.51 (m, 3H), 7.37 – 7.31 (m, 4H), 7.20 (ddd,  $J$  = 7.8, 3.9, 0.9 Hz, 1H), 4.35 (s, 2H).  $^{13}\text{C}$  NMR (100 MHz,  $\text{CDCl}_3$ ):  $\delta$  154.46, 150.82, 143.00, 142.99, 134.11, 130.50, 130.17, 130.05, 129.33, 129.01, 128.52, 127.01, 125.90 (dq,  $J$  = 7.7, 3.8 Hz,  $\text{C}^*$ 2), 123.26, 120.09, 114.77, 111.57, 30.07. HRMS(EI+)  $m/z$ : Calcd for  $\text{C}_{23}\text{H}_{14}\text{F}_6\text{O}$ : 420.0949, found: 420.0948

**3-Methyl-3-(4-(trifluoromethyl)phenyl)benzofuran-2(3H)-one.** The desired product was obtained as a yellow liquid in 6% yield (0.017 g). When pre-stirred solution was used, the desired product was obtained in 6% yield (0.018 g).

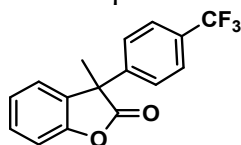

$^1\text{H}$  NMR (400 MHz,  $\text{CDCl}_3$ ):  $\delta$  7.62 – 7.58 (m, 2H), 7.48 (d,  $J$  = 8.2 Hz, 2H), 7.42 – 7.37 (m, 1H), 7.26 – 7.21 (m, 3H), 1.93 (s, 3H).  $^{13}\text{C}$  NMR (100 MHz,  $\text{CDCl}_3$ ):  $\delta$  178.10, 152.86, 143.48, 131.87, 130.50, 130.18, 129.64, 127.20, 125.93 (q,  $J$  = 3.8 Hz), 124.95, 124.65, 111.44, 51.00, 25.13. HRMS(EI+)  $m/z$ : Calcd for  $\text{C}_{16}\text{H}_{11}\text{F}_3\text{O}_2$ : 292.0711, found: 292.0709. IR (neat): 1804.51  $\text{cm}^{-1}$  (C=O).

**3-(2-Methylbenzyl)-2-(o-tolyl)benzofuran (11).** The desired product was obtained as a colorless oil in 43% yield (0.135 g). When pre-stirred solution was used, the desired product was obtained in 44% yield (0.137 g).

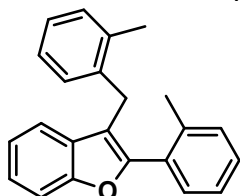

$^1\text{H}$  NMR (400 MHz,  $\text{CDCl}_3$ ):  $\delta$  7.48 (d,  $J$  = 7.9 Hz, 1H), 7.31 (d,  $J$  = 7.3 Hz, 1H), 7.29 – 7.25 (m, 2H), 7.23 (d,  $J$  = 7.5 Hz, 2H), 7.18 – 7.14 (m, 1H), 7.13 – 7.08 (m, 3H), 7.03 (dd,  $J$  = 9.3, 2.5 Hz, 2H), 3.96 (s, 2H), 2.36 (s, 3H), 2.23 (s, 3H).  $^{13}\text{C}$  NMR (100 MHz,  $\text{CDCl}_3$ ):  $\delta$  154.58, 153.65, 138.47, 137.52, 136.36, 120.78, 130.48, 130.12, 129.36, 130.78, 130.48, 130.12, 129.36, 128.38, 126.35, 126.09, 125.73, 124.14, 122.92, 122.48, 120.59, 120.42, 119.68, 114.62, 111.22, 27.97, 20.52, 19.77. HRMS(EI+)  $m/z$ : Calcd for  $\text{C}_{23}\text{H}_{20}\text{O}$ : 312.1514, found: 312.1511.

**3-(3-Methoxybenzyl)-2-(3-methoxyphenyl)benzofuran (12).** The desired product was obtained as a colorless oil in 30% yield (0.103 g). When pre-stirred solution was used, the desired product was obtained in 21% yield (0.074 g).

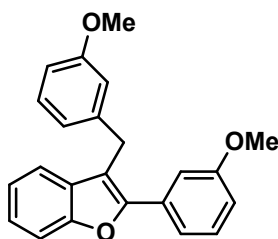

$^1\text{H}$  NMR (400 MHz,  $\text{CDCl}_3$ ):  $\delta$  7.51 (d,  $J$  = 8.2 Hz, 1H), 7.39 – 7.37 (m, 1H), 7.32 (d,  $J$  = 6.6 Hz, 2H), 7.28 (dd,  $J$  = 5.3, 4.4 Hz, 2H), 7.19 – 7.14 (m, 2H), 6.90 (dt,  $J$  = 6.7, 2.4 Hz, 1H), 6.85 (dd,

$J = 7.6, 0.5$  Hz, 1H), 6.81 (d,  $J = 2.0$  Hz, 1H), 6.74 (dd,  $J = 8.2, 2.5$  Hz, 1H), 4.27 (s, 2H), 3.76 (s, 3H), 3.71 (s, 3H).  $^{13}\text{C}$  NMR (100 MHz,  $\text{CDCl}_3$ ):  $\delta$  159.98, 159.90, 154.15, 152.16, 141.10, 132.18, 130.66, 129.87, 129.72, 124.63, 122.74, 120.68, 120.01, 119.48, 114.69, 114.25, 113.97, 112.10, 111.53, 111.19, 55.37, 55.22, 30.22. HRMS(EI+)  $m/z$ : Calcd for  $\text{C}_{23}\text{H}_{20}\text{O}_3$ : 344.1412, found: 344.1411.

**3-(3-Methoxyphenyl)-3-methylbenzofuran-2(3H)-one.** The desired product was obtained as a yellow liquid in 15% yield (0.037 g). When pre-stirred solution was used, the desired product was obtained in 6% yield (0.016 g).

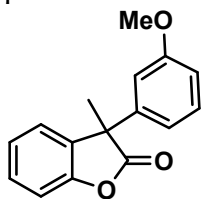

$^1\text{H}$  NMR (400 MHz,  $\text{CDCl}_3$ ):  $\delta$  7.37 – 7.31 (m, 1H), 7.27 – 7.16 (m, 4H), 6.93 – 6.87 (m, 2H), 6.84 – 6.80 (m, 1H), 3.76 (s, 3H), 1.89 (s, 3H).  $^{13}\text{C}$  NMR (100 MHz,  $\text{CDCl}_3$ ):  $\delta$  178.68, 159.94, 152.81, 141.11, 132.70, 129.92, 129.16, 124.66, 124.64, 118.95, 113.13, 112.82, 111.11, 55.36, 50.95, 24.87. HRMS(EI+)  $m/z$ : Calcd for  $\text{C}_{16}\text{H}_{14}\text{O}_3$ : 254.0943, found: 254.0941. IR (neat): 1801.76  $\text{cm}^{-1}$  (C=O).

**3-(3-(3-Formylbenzyl)benzofuran-2-yl)benzaldehyde (13).** The desired product was obtained as a yellow oil in 56% yield (0.191 g). When pre-stirred solution was used, the desired product was obtained in 54% yield (0.185 g).

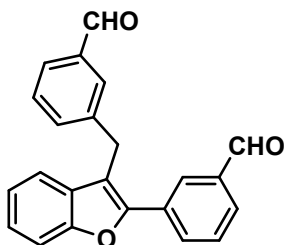

$^1\text{H}$  NMR (400 MHz,  $\text{CDCl}_3$ )  $\delta$  9.93 (s, 1H), 9.85 (s, 1H), 8.16 (s, 1H), 7.86 (dd,  $J = 7.8, 0.9$  Hz, 1H), 7.77 – 7.73 (m, 1H), 7.69 (s, 1H), 7.64 (d,  $J = 7.3$  Hz, 1H), 7.51 – 7.41 (m, 3H), 7.35 (s, 1H), 7.25 (dt,  $J = 11.3, 5.5$  Hz, 2H), 7.11 (s, 1H), 4.30 (s, 2H).  $^{13}\text{C}$  NMR (100 MHz,  $\text{CDCl}_3$ ):  $\delta$  192.26, 191.76, 154.19, 150.58, 140.04, 136.81, 136.80, 134.26, 132.16, 131.63, 129.96, 129.57, 129.48, 129.34, 129.19, 128.23, 127.87, 125.29, 123.07, 119.91, 114.39, 111.38, 29.85. HRMS(EI+)  $m/z$ : Calcd for  $\text{C}_{23}\text{H}_{16}\text{O}_3$ : 340.1099, found: 340.1100.

**3-(3-Methyl-2-oxo-2,3-dihydrobenzofuran-3-yl)benzaldehyde.** The desired product was obtained as a yellow liquid in 11% yield (0.027 g). When pre-stirred solution was used, the desired product was obtained in 11% yield (0.027 g).

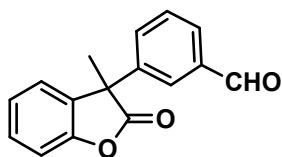

$^1\text{H}$  NMR (400 MHz,  $\text{CDCl}_3$ )  $\delta$  9.91 (s, 1H), 7.81 (s, 1H), 7.75 (d,  $J$  = 7.5 Hz, 1H), 7.56 – 7.52 (m, 1H), 7.45 (t,  $J$  = 7.7 Hz, 1H), 7.32 (dd,  $J$  = 8.5, 4.2 Hz, 1H), 7.16 (t,  $J$  = 6.1 Hz, 3H), 1.88 (s, 3H).  $^{13}\text{C}$  NMR (100 MHz,  $\text{CDCl}_3$ ):  $\delta$  191.93, 178.27, 152.84, 140.85, 136.92, 132.80, 131.89, 129.77, 129.62, 129.52, 127.65, 125.00, 124.62, 111.43, 50.88, 25.18. HRMS(EI+)  $m/z$ : Calcd for  $\text{C}_{16}\text{H}_{12}\text{O}_3$ : 252.0786, found: 252.0788. IR (neat): 1801.99  $\text{cm}^{-1}$  (C=O).

**1-(4-(3-(4-Acetylbenzyl)benzofuran-2-yl)phenyl)ethan-1-one (14).** The desired product was obtained as a yellow oil in 36% yield (0.132 g). When pre-stirred solution was used, the desired product was obtained in 34% yield (0.126 g).

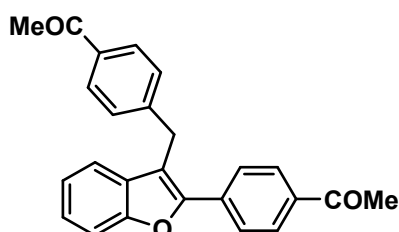

$^1\text{H}$  NMR (400 MHz,  $\text{CDCl}_3$ )  $\delta$  7.93 (d,  $J$  = 8.4 Hz, 2H), 7.81 (d,  $J$  = 8.2 Hz, 2H), 7.74 (d,  $J$  = 8.5 Hz, 2H), 7.48 (d,  $J$  = 8.1 Hz, 1H), 7.27 (t,  $J$  = 7.9 Hz, 4H), 7.13 (t,  $J$  = 7.4 Hz, 1H), 4.31 (s, 2H), 2.53 (s, 3H), 2.48 (s, 3H).  $^{13}\text{C}$  NMR (100 MHz,  $\text{CDCl}_3$ ):  $\delta$  197.80, 197.48, 154.43, 151.01, 144.53, 136.48, 135.80, 135.03, 130.17, 129.01, 128.94, 128.43, 126.74, 125.59, 123.16, 120.07, 115.20, 111.50, 30.36, 26.76, 26.69. HRMS(EI+)  $m/z$ : Calcd for  $\text{C}_{25}\text{H}_{20}\text{O}_3$ : 368.1412, found: 368.1415.

**3-(4-Acetylphenyl)-3-methylbenzofuran-2(3H)-one.** The desired product was obtained as a yellow liquid in 10% yield (0.027 g). When pre-stirred solution was used, the desired product was obtained in 14% yield (0.036 g).

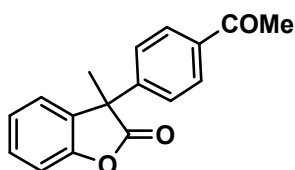

$^1\text{H}$  NMR (400 MHz,  $\text{CDCl}_3$ )  $\delta$  7.85 (d,  $J$  = 8.5 Hz, 2H), 7.38 (d,  $J$  = 8.6 Hz, 2H), 7.33 – 7.28 (m, 1H), 7.17 – 7.12 (m, 3H), 2.51 (s, 3H), 1.86 (s, 3H).  $^{13}\text{C}$  NMR (100 MHz,  $\text{CDCl}_3$ ):  $\delta$  197.56, 178.14, 152.83, 144.59, 136.65, 132.07, 129.54, 128.94, 126.98, 124.91, 124.62, 111.38, 51.17, 26.78, 24.98. HRMS(EI+)  $m/z$ : Calcd for  $\text{C}_{17}\text{H}_{14}\text{O}_3$ : 266.0943, found: 266.0945. IR (neat): 1804.10  $\text{cm}^{-1}$  (C=O).

**2-Phenyl-3-(1-phenylethyl)benzofuran (18)** The desired product was obtained as a colorless oil in 77% yield (0.23 g).

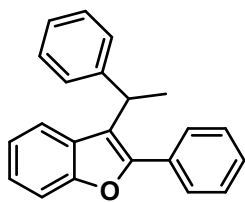

$^1\text{H}$  NMR (400 MHz,  $\text{CDCl}_3$ ):  $\delta$  7.74 – 7.69 (m, 2H), 7.51 – 7.47 (m, 1H), 7.46 – 7.40 (m, 2H), 7.39 – 7.32 (m, 4H), 7.27 (ddd,  $J$  = 6.2, 5.6, 2.4 Hz, 2H), 7.24 – 7.15 (m, 2H), 7.11 – 7.04 (m, 1H), 4.72 – 4.66 (m, 1H), 1.81 (dd,  $J$  = 7.3, 4.1 Hz, 3H).  $^{13}\text{C}$  NMR (100 MHz,  $\text{CDCl}_3$ ):  $\delta$  154.62, 151.43, 144.42, 131.17, 128.89, 128.77, 128.64, 128.55, 127.91, 127.38, 126.28, 124.19, 122.36, 121.74, 119.69, 111.39, 35.12, 20.46. HRMS(EI+)  $m/z$ : Calcd for  $\text{C}_{22}\text{H}_{18}\text{O}$ : 298.1358, found: 298.1356.

**3-Ethyl-3-phenylbenzofuran-2(3H)-one (19).** The desired product was obtained as a yellow liquid in 12% yield (0.029 g).

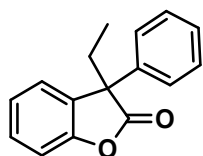

$^1\text{H}$  NMR (400 MHz,  $\text{CDCl}_3$ ):  $\delta$  7.41 – 7.37 (m, 2H), 7.35 (d,  $J$  = 1.0 Hz, 3H), 7.30 – 7.22 (m, 4H), 7.19 (s, 1H), 2.54 – 2.45 (m, 1H), 2.32 – 2.22 (m, 1H), 0.79 (t,  $J$  = 7.4 Hz, 3H).  $^{13}\text{C}$  NMR (100 MHz,  $\text{CDCl}_3$ ):  $\delta$  178.28, 153.55, 138.92, 130.13, 129.16, 128.91, 127.97, 126.90, 125.25, 124.49, 111.10, 56.59, 32.14, 9.44. HRMS(EI+)  $m/z$ : Calcd for  $\text{C}_{16}\text{H}_{14}\text{O}_2$ : 238.0994, found: 238.0990. IR (neat): 1799.94  $\text{cm}^{-1}$  (C=O).

**2-Phenyl-3-(1-phenylbutyl)benzofuran (21).** The desired product was obtained as a colorless oil in 61% yield (0.198 g).

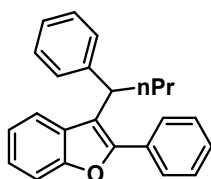

$^1\text{H}$  NMR (400 MHz,  $\text{CDCl}_3$ ):  $\delta$  7.69 (dd,  $J$  = 8.3, 1.2 Hz, 2H), 7.58 (d,  $J$  = 7.8 Hz, 1H), 7.50 (d,  $J$  = 8.2 Hz, 1H), 7.44 – 7.33 (m, 5H), 7.29 – 7.22 (m, 3H), 7.19 – 7.12 (m, 2H), 4.47 (dd,  $J$  = 9.8, 6.1 Hz, 1H), 2.29 – 2.14 (m, 2H), 1.28 – 1.21 (m, 2H), 0.80 (t,  $J$  = 7.4 Hz, 3H).  $^{13}\text{C}$  NMR (100 MHz,  $\text{CDCl}_3$ ):  $\delta$  154.60, 152.50, 144.45, 131.19, 129.13, 128.69, 128.63, 128.60, 128.08, 127.76, 126.28, 124.19, 122.48, 121.77, 117.94, 111.46, 41.54, 37.13, 21.51, 14.11. HRMS(EI+)  $m/z$ : Calcd for  $\text{C}_{24}\text{H}_{22}\text{O}$ : 326.1671, found: 326.1669.

**3-Butyl-3-phenylbenzofuran-2(3H)-one (22).** The desired product was obtained as a yellow

liquid in 3% yield (0.008 g).

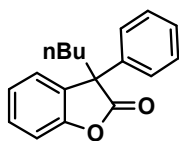

$^1\text{H}$  NMR (400 MHz,  $\text{CDCl}_3$ ):  $\delta$  7.40 – 7.36 (m, 2H), 7.35 – 7.30 (m, 2H), 7.30 – 7.21 (m, 4H), 7.18 (d,  $J$  = 8.0 Hz, 1H), 2.47 – 2.38 (m, 1H), 2.27 – 2.19 (m, 1H), 1.36 – 1.14 (m, 4H), 0.82 (t,  $J$  = 7.2 Hz, 3H).  $^{13}\text{C}$  NMR (100 MHz,  $\text{CDCl}_3$ ):  $\delta$  178.38, 153.42, 139.11, 130.47, 129.11, 128.90, 127.93, 126.82, 125.25, 124.46, 111.11, 55.92, 38.86, 27.10, 22.80, 13.88. HRMS(EI+)  $m/z$ : Calcd for  $\text{C}_{18}\text{H}_{18}\text{O}_2$ : 266.1307, found: 266.1308. IR (neat): 1801.36  $\text{cm}^{-1}$  (C=O).

**(E)-3-Butylidene-2-phenyl-2,3-dihydrobenzofuran (23).** The desired product was obtained as a colorless oil in 12% yield (0.031 g).

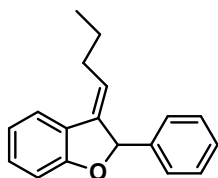

$^1\text{H}$  NMR (400 MHz,  $\text{CDCl}_3$ ):  $\delta$  7.40 – 7.31 (m, 6H), 7.15 (dd,  $J$  = 11.2, 4.3 Hz, 1H), 6.92 – 6.88 (m, 1H), 6.82 (d,  $J$  = 8.1 Hz, 1H), 6.14 (dt,  $J$  = 2.9, 1.5 Hz, 1H), 5.97 (td,  $J$  = 7.7, 2.8 Hz, 1H), 1.89 – 1.77 (m, 2H), 1.29 – 1.20 (m, 2H), 0.75 (t,  $J$  = 7.3 Hz, 3H).  $^{13}\text{C}$  NMR (100 MHz,  $\text{CDCl}_3$ ):  $\delta$  161.52, 139.81, 138.63, 129.58, 128.82, 128.77, 127.86, 126.76, 120.81, 120.44, 120.00, 110.40, 86.51, 31.43, 22.40, 13.83. HRMS(EI+)  $m/z$ : Calcd for  $\text{C}_{18}\text{H}_{18}\text{O}$ : 250.1358, found: 250.1356.

**2-Phenyl-3-(propan-2-ylidene)-2,3-dihydrobenzofuran (25).** The desired product was obtained as a colorless oil in 16% yield (0.037 g).

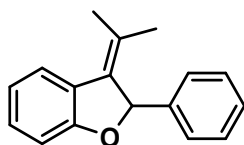

$^1\text{H}$  NMR (400 MHz,  $\text{CDCl}_3$ ):  $\delta$  7.55 (d,  $J$  = 7.6 Hz, 1H), 7.32 (dd,  $J$  = 7.0, 2.7 Hz, 5H), 7.13 (t,  $J$  = 7.5 Hz, 1H), 6.92 (t,  $J$  = 7.5 Hz, 1H), 6.81 (d,  $J$  = 8.0 Hz, 1H), 6.12 (s, 1H), 2.13 (s, 3H), 1.61 (s, 3H).  $^{13}\text{C}$  NMR (100 MHz,  $\text{CDCl}_3$ ):  $\delta$  162.21, 140.14, 132.27, 128.82, 128.57, 127.77, 127.33, 127.20, 123.96, 120.55, 110.19, 87.08, 24.01, 21.64. HRMS(EI+)  $m/z$ : Calcd for  $\text{C}_{17}\text{H}_{16}\text{O}$ : 236.1201, found: 236.1199.

**3-Benzhydryl-2-phenylbenzofuran (27).** The desired product was obtained as a white solid in 4% yield (0.014 g). m.p : 127  $^{\circ}\text{C}$



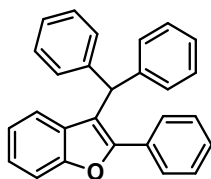

$^1\text{H}$  NMR (400 MHz,  $\text{CDCl}_3$ ):  $\delta$  7.70 – 7.63 (m, 2H), 7.49 (dd,  $J$  = 8.3, 0.7 Hz, 1H), 7.45 – 7.37 (m, 3H), 7.30 – 7.18 (m, 11H), 7.01 – 6.95 (m, 1H), 6.90 (d,  $J$  = 7.9 Hz, 1H), 5.90 (s, 1H).  $^{13}\text{C}$  NMR (100 MHz,  $\text{CDCl}_3$ ):  $\delta$  154.52, 152.39, 142.71, 130.82, 129.64, 129.31, 128.76, 128.59, 127.91, 126.73, 124.15, 122.54, 122.07, 117.90, 111.28, 47.34. HRMS(EI+)  $m/z$ : Calcd for  $\text{C}_{27}\text{H}_{20}\text{O}$ : 360.1514, found: 360.1513.

**(E)-3-Benzylidene-2-phenyl-2,3-dihydrobenzofuran (28).** The desired product was obtained as a colorless oil in 17% yield (0.048 g).

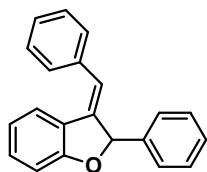

$^1\text{H}$  NMR (400 MHz,  $\text{CDCl}_3$ ):  $\delta$  7.43 – 7.24 (m, 12H), 6.91 (dd,  $J$  = 8.0, 2.5 Hz, 1H), 6.75 – 6.69 (m, 1H), 6.25 (d,  $J$  = 2.4 Hz, 1H), 6.15 (d,  $J$  = 2.6 Hz, 1H).  $^{13}\text{C}$  NMR (100 MHz,  $\text{CDCl}_3$ ):  $\delta$  163.68, 152.26, 141.04, 140.71, 136.93, 131.00, 128.92, 128.83, 128.54, 128.52, 127.64, 127.45, 123.97, 122.08, 120.61, 110.72, 88.56. HRMS(EI+)  $m/z$ : Calcd for  $\text{C}_{21}\text{H}_{16}\text{O}$ : 284.1201, found: 284.1203.

**3-Benzyl-2-phenylnaphtho[2,3-b]furan (16).** The desired product was obtained as a white solid in 34% yield (0.114 g). m.p : 153 °C

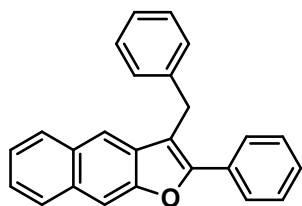

$^1\text{H}$  NMR (400 MHz,  $\text{cdcl}_3$ )  $\delta$  7.92 (d,  $J$  = 8.7 Hz, 2H), 7.82 (dd,  $J$  = 15.3, 7.4 Hz, 4H), 7.48 – 7.37 (m, 5H), 7.33 – 7.26 (m, 4H), 7.23 (d,  $J$  = 3.3 Hz, 1H), 4.40 (s, 2H).  $^{13}\text{C}$  NMR (100 MHz,  $\text{CDCl}_3$ ):  $\delta$  154.37, 153.18, 139.19, 131.92, 131.82, 130.75, 130.48, 128.98, 128.92, 128.85, 128.28, 128.18, 127.94, 127.32, 126.55, 124.98, 124.07, 117.85, 113.19, 106.61, 30.29. HRMS(EI+)  $m/z$ : Calcd for  $\text{C}_{21}\text{H}_{16}\text{O}$ : 334.1358, found: 334.1355.

**3-Benzyl-6-methyl-2-phenylbenzofuran (30).** The desired product was obtained as a colorless oil in 64% yield (0.192 g). When pre-stirred solution was used, the desired product was obtained in 72% yield (0.215 g).

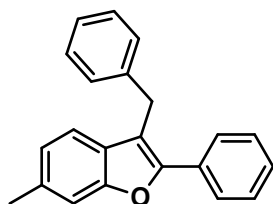

$^1\text{H}$  NMR (400 MHz,  $\text{CDCl}_3$ )  $\delta$  7.63 – 7.57 (m, 2H), 7.25 (t,  $J$  = 7.5 Hz, 2H), 7.17 (d,  $J$  = 7.3 Hz, 2H), 7.11 (d,  $J$  = 4.5 Hz, 4H), 7.06 (d,  $J$  = 7.7 Hz, 2H), 6.83 (d,  $J$  = 7.9 Hz, 1H), 4.12 (s, 2H), 2.30 (s, 3H).  $^{13}\text{C}$  NMR (100 MHz,  $\text{CDCl}_3$ ):  $\delta$  154.65, 151.59, 139.47, 134.83, 128.78, 128.71, 128.26, 128.22, 126.86, 126.37, 124.08, 119.56, 30.23, 21.84. HRMS(EI+)  $m/z$ : Calcd for  $\text{C}_{22}\text{H}_{18}\text{O}$ : 298.1358, found: 298.1356.

**3,6-Dimethyl-3-phenylbenzofuran-2(3H)-one.** The desired product was obtained as a yellow liquid in 7% yield (0.017 g). When pre-stirred solution was used, the desired product was obtained in 4% yield (0.01 g).

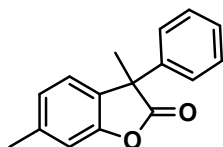

$^1\text{H}$  NMR (400 MHz,  $\text{CDCl}_3$ )  $\delta$  7.26 – 7.19 (m, 5H), 7.03 (d,  $J$  = 8.0 Hz, 1H), 6.95 (s, 2H), 2.34 (s, 3H), 1.81 (s, 3H).  $^{13}\text{C}$  NMR (100 MHz,  $\text{CDCl}_3$ ):  $\delta$  179.23, 152.95, 139.84, 139.65, 129.70, 128.91, 127.92, 126.62, 125.32, 124.31, 111.73, 50.90, 25.08, 21.86. HRMS(EI+)  $m/z$ : Calcd for  $\text{C}_{16}\text{H}_{14}\text{O}_2$ : 238.0994, found: 238.0991. IR (neat): 1801.62  $\text{cm}^{-1}$  (C=O).

## ● Kinetic isotope effect

The kinetic isotope effects in bis-arylation of 3-methylbenzofuran were derived from the following pseudo-first-order rate experiments. The results are shown in Figure S2. The yield corresponding to the point in the time axis was determined by a separate reaction. Experiments for both the deuterated (**1-D**, **1-CD<sub>3</sub>**) and the non-deuterated substrates were conducted simultaneously. **1-D** and **1-CD<sub>3</sub>** were prepared according to literature procedures.<sup>2</sup>

## Experimental Procedure

In 5ml chem glass, Ag<sub>2</sub>CO<sub>3</sub> (0.204 g, 0.3 mmol) was dried under high vacuum. In a separate dried flasks were made three solutions, two for the deuterated and one for the non-deuterated substrate. Each solution was prepared in the following manner: Pd(OAc)<sub>2</sub> (0.045 g, 0.2 mmol) and PCy<sub>3</sub> (0.112 g, 0.4 mmol), iodobenzene (4.08 g, 20 mmol), PivOH (0.204 g, 2 mmol) were added to a flame dried flask under argon. Next, 3-methylbenzofuran (0.264 g, 2 mmol) was added and the solution was stirred until it was homogeneous. An aliquot of catalyst solution (471 mg, 0.2 mmol scale of 3-methylbenzofuran), and H<sub>2</sub>O (1 mL) were then added to the Ag<sub>2</sub>CO<sub>3</sub>. The resulting reaction was stirred at room temperature in the sealed. One set of reactions was taken off at the desired time points. The solutions were extracted with ethyl acetate and filtered to remove catalyst residue, and finally evaporated under reduced pressures. An aliquot of this solution was analyzed by NMR spectroscopy versus the external standard (Methanol, 0.02 mL, 0.5 mmol).

## Representative crude NMR spectrum for KIE measurements

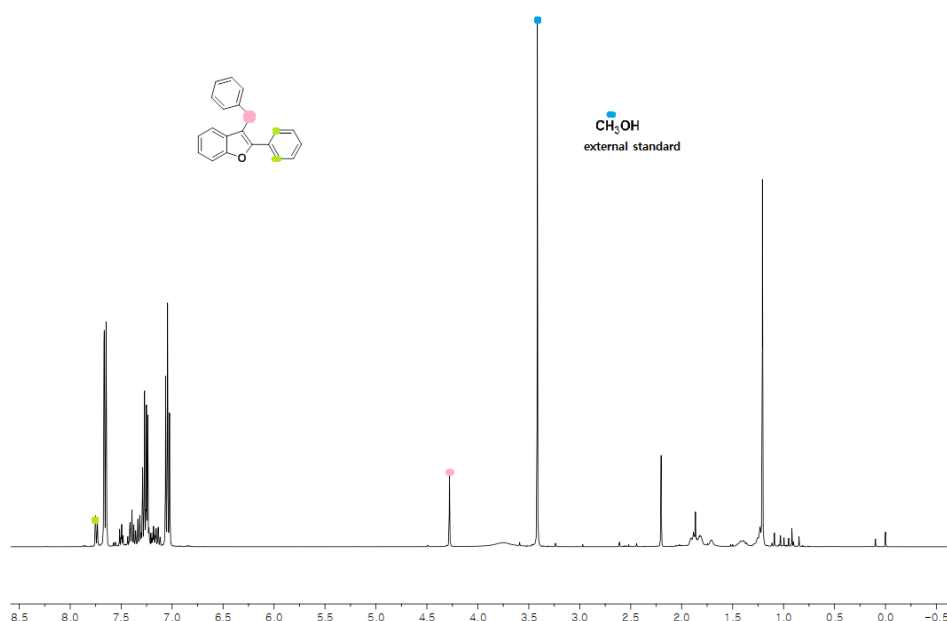

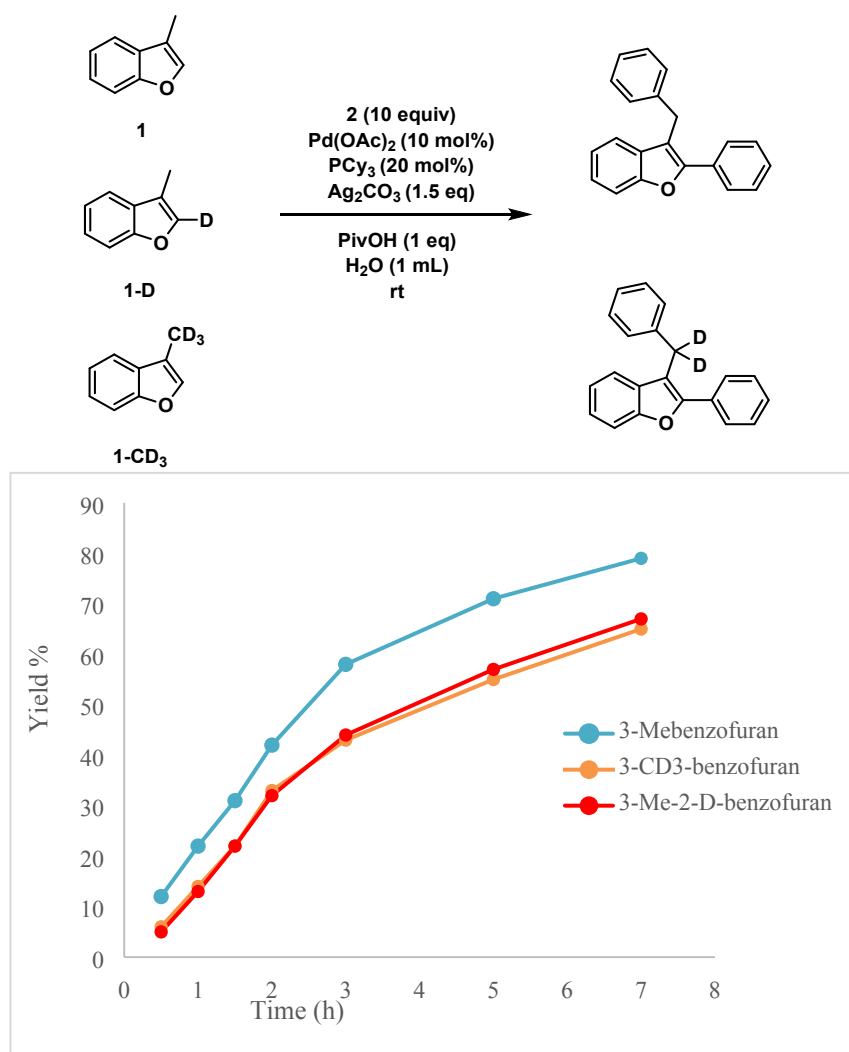

Figure S2. Pseudo-first-order rate constants and KIE for bis-arylation of **1**, **1-D** and **1-CD<sub>3</sub>**.

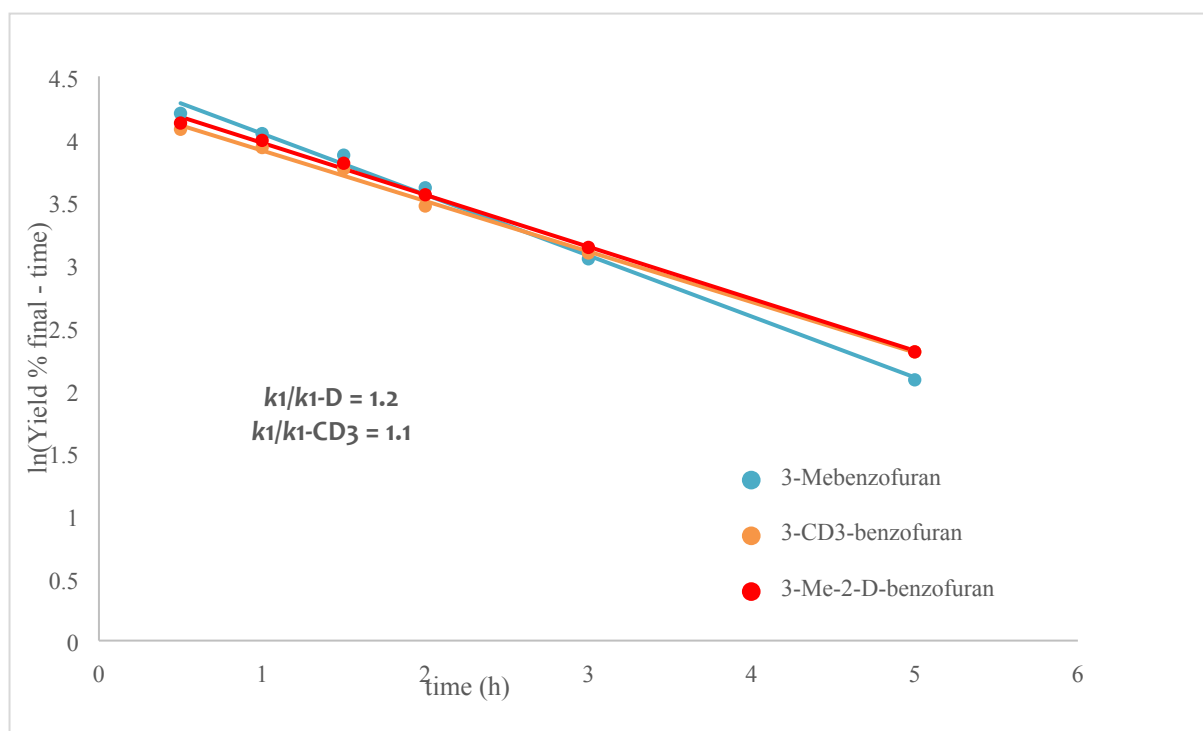

Figure S2 continued. Pseudo-first-order rate constants and KIE for bis-arylation of **1**, **1-D** and **1-CD<sub>3</sub>**.

**3-methylbenzofuran-2-d (1-D)**. Deuterium was 94% enriched in 2-position, as determined by <sup>1</sup>H NMR.

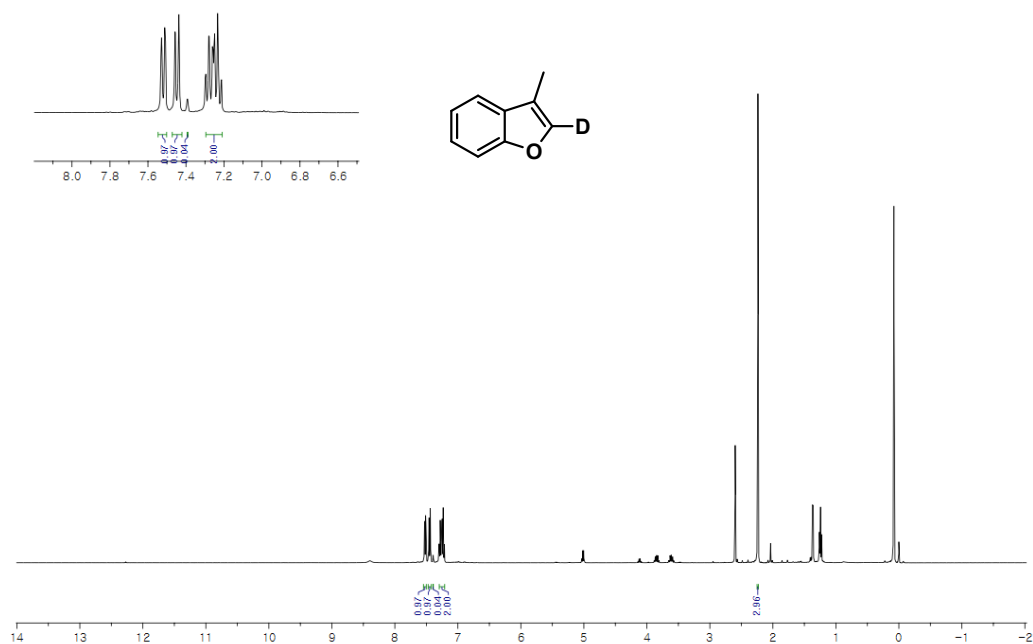

**3-(methyl-d<sub>3</sub>)benzofuran (1-CD<sub>3</sub>).** Deuterium was 100% enriched in 3-methylposition, as determined by <sup>1</sup>H NMR.

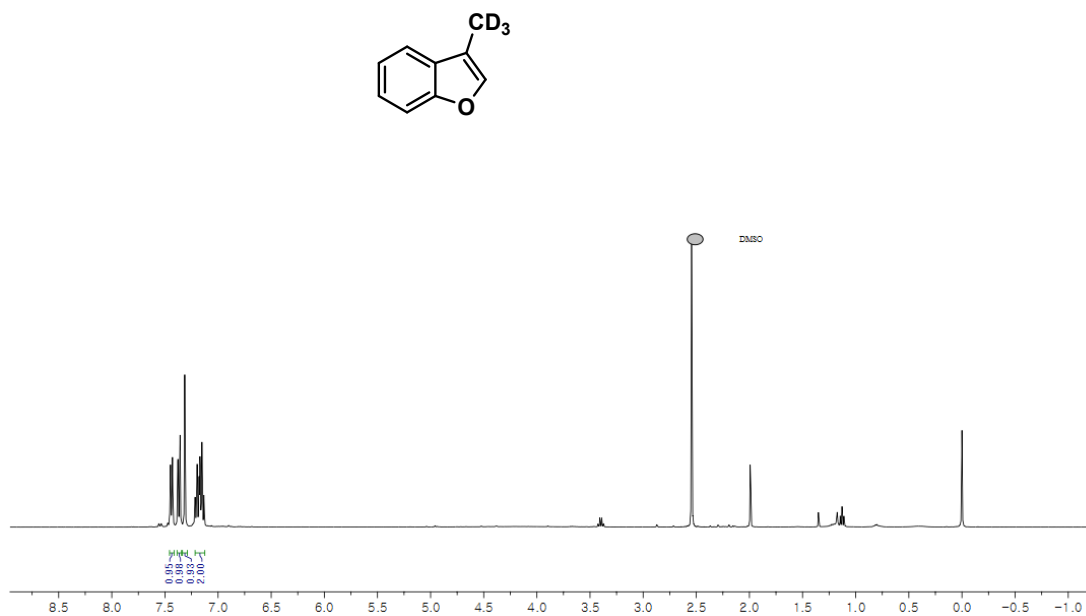

## Determination of KIE by the method of competing reactions

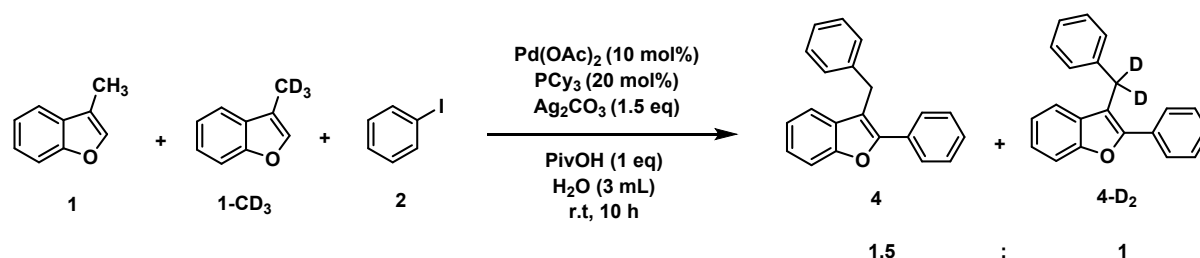

Reactions were performed in a schlenk tube equipped with a stirring bar charged with **1** (66 mg, 0.5 mmol), **1-CD<sub>3</sub>** (68 mg, 0.5 mmol), Pd(OAc)<sub>2</sub> (22 mg, 0.1 mmol), PCy<sub>3</sub> (56 mg, 0.2 mmol), Ag<sub>2</sub>CO<sub>3</sub> (413 mg, 1.5 mmol), PivOH (0.11 mL, 1 mmol), and H<sub>2</sub>O (3 mL). The mixture was stirred at room temperature for 10 h. The mixture was extracted with ethyl acetate, filtered to remove catalyst residue, and finally evaporated under reduced pressures. The mixture was purified by flash chromatography on silica gel (*n*-hexane/ethyl acetate) and the product **4** was obtained with 42%. <sup>1</sup>H NMR (400 MHz, CDCl<sub>3</sub>) δ 7.67 (d, *J* = 7.6 Hz, 2.0H), 7.43 (d, *J* = 8.2 Hz, 1.0H), 7.34 (t, *J* = 7.6 Hz, 2.0H), 7.26 (dt, *J* = 14.3, 5.8 Hz, 2.0H), 7.22 – 7.16 (m, 5.0H), 7.14 – 7.10 (m, 1.0H), 7.07 (t, *J* = 7.5 Hz, 1.0H), 4.22 (s, 1.2H). The KIE value was calculated as *k*<sub>1</sub>/*k*<sub>1-CD<sub>3</sub></sub> = 1.5

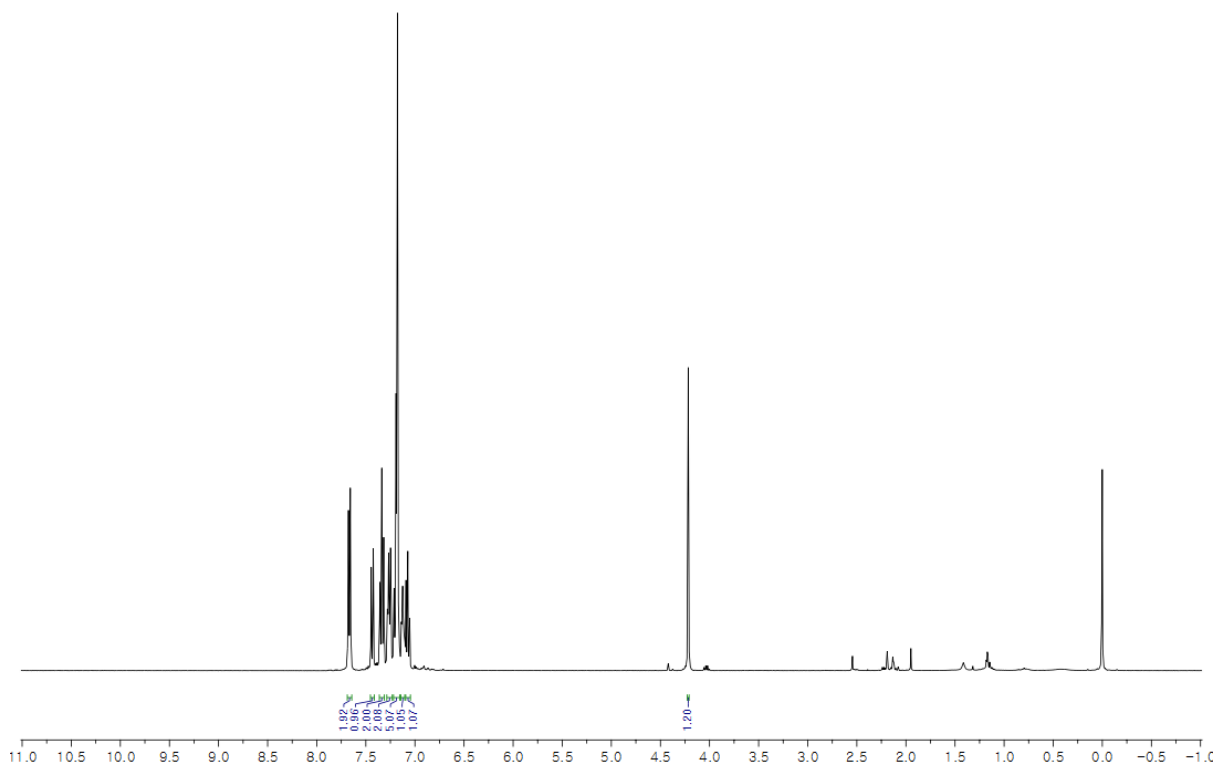

## ● X-ray analysis

Data sets were collected with a PHOTON 100 CMOS diffractometer. Programs used : solve structure XS (Sheldrick, 2008); refine structure XL (Sheldrick, 2008); molecular graphics: Olex2 (Dolomanov *et al.*, 2009); software used to prepare material for publication: Olex2 (Dolomanov *et al.*, 2009).

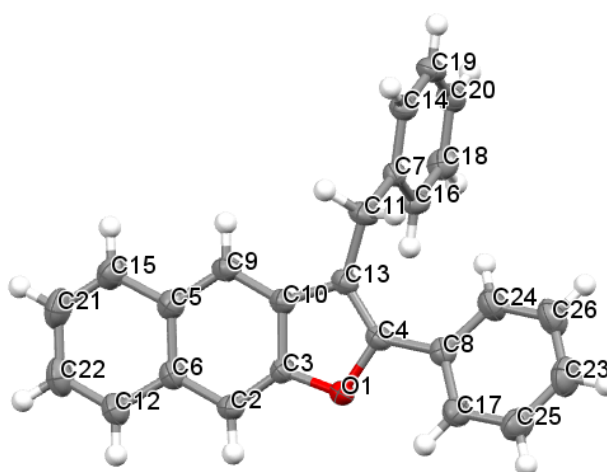

(Thermal ellipsoids are shown with 50% probability)

**Table S2.** Experimental details

|                             |                                     |
|-----------------------------|-------------------------------------|
| Compound                    | <b>16</b>                           |
| CCDC number                 | 1045349                             |
| Chemical formula            | $C_{25}H_{18}O$                     |
| Molecular weight            | 334.39                              |
| Crystal system, space group | Monoclinic, $P2_1$                  |
| Temperature (K)             | 223                                 |
| $a, b, c$ (Å)               | 8.2582 (2), 6.2091 (2), 17.8371 (5) |
| $\beta$ (°)                 | 103.1477 (14)                       |
| $V$ (Å <sup>3</sup> )       | 890.64 (4)                          |



|                                                                            |                                                         |
|----------------------------------------------------------------------------|---------------------------------------------------------|
| Z                                                                          | 2                                                       |
| Calculated density Mg/m <sup>3</sup>                                       | 1.247                                                   |
| Radiation type                                                             | Mo K $\alpha$ , $\lambda = 0.71073$ Å                   |
| $\mu$ (mm <sup>-1</sup> )                                                  | 0.07                                                    |
| Crystal size (mm)                                                          | 0.24 $\times$ 0.18 $\times$ 0.1                         |
| $F(000)$                                                                   | 352                                                     |
| Theta range for data collection                                            | $\theta = 2.4\text{--}28.3^\circ$                       |
| Absorption correction                                                      | Multi-scan                                              |
| $T_{\min}$ , $T_{\max}$                                                    | 0.982, 0.993                                            |
| No. of measured, independent and observed [ $I > 2\sigma(I)$ ] reflections | 31392, 4438, 3479                                       |
| $R_{\text{int}}$                                                           | 0.060                                                   |
| $(\sin \theta/\lambda)_{\max}$ (Å <sup>-1</sup> )                          | 0.669                                                   |
| Limiting indices                                                           | $h = -11 \sim 11$ , $k = -8 \sim 8$ , $l = -23 \sim 23$ |
| Radiation source: fine-focus sealed tube                                   |                                                         |
| Refinement method                                                          | full matrix least-squares on $F^2$                      |
| $R[F^2 > 2\sigma(F^2)]$ , $wR(F^2)$ , $S$                                  | 0.041, 0.096, 1.08                                      |
| No. of reflections                                                         | 4438                                                    |
| No. of parameters                                                          | 235                                                     |
| No. of restraints                                                          | 1                                                       |
| H-atom treatment                                                           | H-atom parameters constrained                           |
| $\Delta\rho_{\max}$ , $\Delta\rho_{\min}$ (e Å <sup>-3</sup> )             | 0.17, -0.18                                             |

Table S3. Fractional atomic coordinates and isotropic or equivalent isotropic displacement parameters (Å<sup>2</sup>)

|    | x             | y             | z             | $U_{\text{iso}}^*/U_{\text{eq}}$ |
|----|---------------|---------------|---------------|----------------------------------|
| O1 | -0.98315 (13) | -0.43300 (18) | -0.25200 (6)  | 0.0302 (3)                       |
| C2 | -0.82171 (19) | -0.4148 (3)   | -0.11916 (10) | 0.0312 (4)                       |
| H2 | -0.7728       | -0.5510       | -0.1207       | 0.037*                           |

|      |               |             |               |            |
|------|---------------|-------------|---------------|------------|
| C3   | -0.93398 (19) | -0.3361 (3) | -0.18060 (9)  | 0.0279 (4) |
| C4   | -1.09181 (19) | -0.2887 (3) | -0.29875 (10) | 0.0301 (4) |
| C5   | -0.8591 (2)   | -0.0775 (3) | -0.05212 (10) | 0.0347 (4) |
| C6   | -0.7812 (2)   | -0.2843 (3) | -0.05272 (10) | 0.0327 (4) |
| C7   | -1.38173 (18) | 0.1117 (2)  | -0.27846 (9)  | 0.0274 (3) |
| C8   | -1.15316 (19) | -0.3586 (3) | -0.37822 (10) | 0.0320 (4) |
| C9   | -0.97567 (19) | -0.0051 (3) | -0.11761 (10) | 0.0333 (4) |
| H9   | -1.0279       | 0.1292      | -0.1172       | 0.040*     |
| C10  | -1.01252 (18) | -0.1333 (3) | -0.18246 (9)  | 0.0280 (3) |
| C11  | -1.20523 (19) | 0.0936 (3)  | -0.28924 (11) | 0.0334 (4) |
| H11A | -1.2088       | 0.1047      | -0.3444       | 0.040*     |
| H11B | -1.1418       | 0.2173      | -0.2639       | 0.040*     |
| C12  | -0.6628 (2)   | -0.3508 (3) | 0.01433 (11)  | 0.0401 (4) |
| H12  | -0.6105       | -0.4854     | 0.0148        | 0.048*     |
| C13  | -1.11225 (18) | -0.1073 (3) | -0.25933 (10) | 0.0295 (4) |
| C14  | -1.4642 (2)   | 0.3073 (3)  | -0.29340 (10) | 0.0337 (4) |
| H14  | -1.4096       | 0.4250      | -0.3099       | 0.040*     |
| C15  | -0.8151 (2)   | 0.0506 (3)  | 0.01560 (11)  | 0.0455 (5) |
| H15  | -0.8653       | 0.1859      | 0.0171        | 0.055*     |
| C16  | -1.4654 (2)   | -0.0589 (3) | -0.25453 (10) | 0.0341 (4) |
| H16  | -1.4122       | -0.1930     | -0.2442       | 0.041*     |
| C17  | -1.0685 (2)   | -0.5143 (3) | -0.41054 (11) | 0.0384 (4) |
| H17  | -0.9716       | -0.5773     | -0.3807       | 0.046*     |
| C18  | -1.6269 (2)   | -0.0340 (3) | -0.24554 (11) | 0.0401 (4) |
| H18  | -1.6820       | -0.1513     | -0.2292       | 0.048*     |
| C19  | -1.6250 (2)   | 0.3320 (3)  | -0.28443 (11) | 0.0387 (4) |
| H19  | -1.6787       | 0.4658      | -0.2948       | 0.046*     |
| C20  | -1.7071 (2)   | 0.1612 (3)  | -0.26037 (11) | 0.0392 (4) |
| H20  | -1.8165       | 0.1777      | -0.2542       | 0.047*     |

|     |             |             |               |            |
|-----|-------------|-------------|---------------|------------|
| C21 | −0.7006 (3) | −0.0211 (4) | 0.07856 (12)  | 0.0538 (6) |
| H21 | −0.6728     | 0.0656      | 0.1228        | 0.065*     |
| C22 | −0.6241 (2) | −0.2226 (4) | 0.07786 (11)  | 0.0495 (5) |
| H22 | −0.5454     | −0.2694     | 0.1216        | 0.059*     |
| C23 | −1.2680 (3) | −0.4853 (4) | −0.53134 (12) | 0.0553 (6) |
| H23 | −1.3057     | −0.5264     | −0.5831       | 0.066*     |
| C24 | −1.2981 (2) | −0.2718 (3) | −0.42382 (11) | 0.0438 (5) |
| H24 | −1.3590     | −0.1698     | −0.4027       | 0.053*     |
| C25 | −1.1262 (3) | −0.5767 (3) | −0.48642 (12) | 0.0492 (5) |
| H25 | −1.0683     | −0.6824     | −0.5076       | 0.059*     |
| C26 | −1.3531 (3) | −0.3336 (4) | −0.49958 (12) | 0.0555 (6) |
| H26 | −1.4500     | −0.2713     | −0.5298       | 0.067*     |

Table S4. Atomic displacement parameters ( $\text{\AA}^2$ )

|     | $U^{11}$   | $U^{22}$    | $U^{33}$    | $U^{12}$    | $U^{13}$   | $U^{23}$    |
|-----|------------|-------------|-------------|-------------|------------|-------------|
| O1  | 0.0302 (6) | 0.0290 (6)  | 0.0297 (6)  | 0.0048 (5)  | 0.0031 (5) | 0.0000 (5)  |
| C2  | 0.0311 (8) | 0.0282 (8)  | 0.0346 (9)  | 0.0024 (7)  | 0.0080 (7) | 0.0014 (8)  |
| C3  | 0.0276 (8) | 0.0276 (8)  | 0.0294 (9)  | −0.0022 (6) | 0.0080 (7) | −0.0008 (7) |
| C4  | 0.0258 (7) | 0.0295 (8)  | 0.0345 (9)  | 0.0010 (6)  | 0.0058 (7) | 0.0051 (7)  |
| C5  | 0.0307 (8) | 0.0381 (10) | 0.0375 (10) | −0.0050 (7) | 0.0126 (7) | −0.0041 (8) |
| C6  | 0.0304 (8) | 0.0351 (9)  | 0.0338 (10) | −0.0032 (7) | 0.0099 (7) | 0.0026 (7)  |
| C7  | 0.0258 (7) | 0.0274 (8)  | 0.0274 (8)  | 0.0005 (6)  | 0.0026 (6) | 0.0007 (7)  |
| C8  | 0.0315 (8) | 0.0338 (9)  | 0.0312 (9)  | −0.0036 (7) | 0.0081 (7) | 0.0033 (7)  |
| C9  | 0.0288 (8) | 0.0300 (8)  | 0.0429 (10) | 0.0009 (7)  | 0.0122 (7) | −0.0013 (8) |
| C10 | 0.0220 (7) | 0.0283 (8)  | 0.0342 (9)  | −0.0015 (6) | 0.0079 (7) | 0.0012 (7)  |
| C11 | 0.0283 (8) | 0.0265 (8)  | 0.0463 (11) | 0.0019 (7)  | 0.0104 (8) | 0.0074 (7)  |
| C12 | 0.0378 (9) | 0.0461 (10) | 0.0349 (10) | −0.0004 (8) | 0.0051 (8) | 0.0048 (9)  |
| C13 | 0.0219 (7) | 0.0302 (8)  | 0.0373 (9)  | −0.0005 (6) | 0.0084 (7) | 0.0044 (7)  |

|     |             |             |             |              |             |              |
|-----|-------------|-------------|-------------|--------------|-------------|--------------|
| C14 | 0.0314 (9)  | 0.0289 (8)  | 0.0401 (10) | 0.0011 (7)   | 0.0068 (7)  | 0.0034 (7)   |
| C15 | 0.0446 (10) | 0.0493 (11) | 0.0445 (12) | −0.0034 (9)  | 0.0140 (9)  | −0.0109 (10) |
| C16 | 0.0352 (9)  | 0.0266 (8)  | 0.0417 (10) | 0.0012 (7)   | 0.0113 (8)  | 0.0047 (7)   |
| C17 | 0.0420 (9)  | 0.0376 (9)  | 0.0348 (10) | 0.0004 (8)   | 0.0071 (8)  | 0.0026 (8)   |
| C18 | 0.0364 (9)  | 0.0392 (10) | 0.0477 (11) | −0.0065 (8)  | 0.0158 (8)  | 0.0021 (9)   |
| C19 | 0.0337 (9)  | 0.0344 (10) | 0.0463 (11) | 0.0094 (8)   | 0.0056 (8)  | 0.0018 (8)   |
| C20 | 0.0278 (8)  | 0.0467 (11) | 0.0439 (11) | 0.0029 (8)   | 0.0098 (8)  | −0.0040 (9)  |
| C21 | 0.0572 (13) | 0.0669 (15) | 0.0359 (11) | −0.0116 (11) | 0.0078 (10) | −0.0155 (11) |
| C22 | 0.0457 (11) | 0.0678 (14) | 0.0326 (11) | −0.0062 (10) | 0.0038 (9)  | 0.0025 (10)  |
| C23 | 0.0644 (14) | 0.0655 (15) | 0.0319 (11) | −0.0069 (12) | 0.0024 (10) | −0.0018 (10) |
| C24 | 0.0392 (9)  | 0.0542 (12) | 0.0359 (11) | 0.0052 (9)   | 0.0042 (8)  | 0.0017 (9)   |
| C25 | 0.0592 (12) | 0.0486 (12) | 0.0411 (11) | 0.0002 (10)  | 0.0144 (10) | −0.0058 (10) |
| C26 | 0.0497 (11) | 0.0732 (15) | 0.0370 (12) | 0.0088 (11)  | −0.0040 (9) | 0.0044 (11)  |

Table S5. Geometric parameters (Å, °)

|        |             |         |           |
|--------|-------------|---------|-----------|
| O1—C3  | 1.3833 (19) | C8—C24  | 1.393 (2) |
| O1—C4  | 1.4010 (18) | C9—C10  | 1.380 (2) |
| C2—C3  | 1.355 (2)   | C10—C13 | 1.439 (2) |
| C2—C6  | 1.412 (2)   | C11—C13 | 1.498 (2) |
| C3—C10 | 1.413 (2)   | C12—C22 | 1.362 (3) |
| C4—C8  | 1.459 (2)   | C14—C19 | 1.382 (2) |
| C4—C13 | 1.359 (2)   | C15—C21 | 1.368 (3) |
| C5—C6  | 1.438 (2)   | C16—C18 | 1.387 (2) |
| C5—C9  | 1.408 (2)   | C17—C25 | 1.384 (3) |
| C5—C15 | 1.423 (2)   | C18—C20 | 1.378 (3) |
| C6—C12 | 1.422 (2)   | C19—C20 | 1.379 (3) |
| C7—C11 | 1.517 (2)   | C21—C22 | 1.403 (3) |
| C7—C14 | 1.388 (2)   | C23—C25 | 1.382 (3) |
| C7—C16 | 1.384 (2)   | C23—C26 | 1.372 (3) |
| C8—C17 | 1.393 (2)   | C24—C26 | 1.379 (3) |

|            |             |             |             |
|------------|-------------|-------------|-------------|
| C3—O1—C4   | 106.51 (12) | C3—C10—C13  | 106.41 (14) |
| C3—C2—C6   | 117.37 (15) | C9—C10—C3   | 118.79 (15) |
| O1—C3—C10  | 109.19 (13) | C9—C10—C13  | 134.69 (15) |
| C2—C3—O1   | 126.24 (15) | C13—C11—C7  | 116.48 (13) |
| C2—C3—C10  | 124.48 (15) | C22—C12—C6  | 121.10 (19) |
| O1—C4—C8   | 114.97 (14) | C4—C13—C10  | 106.78 (14) |
| C13—C4—O1  | 111.11 (14) | C4—C13—C11  | 128.32 (16) |
| C13—C4—C8  | 133.87 (16) | C10—C13—C11 | 124.65 (15) |
| C9—C5—C6   | 120.12 (16) | C19—C14—C7  | 121.14 (16) |
| C9—C5—C15  | 121.36 (17) | C21—C15—C5  | 120.68 (19) |
| C15—C5—C6  | 118.52 (17) | C7—C16—C18  | 120.71 (15) |
| C2—C6—C5   | 119.86 (15) | C25—C17—C8  | 120.38 (18) |
| C2—C6—C12  | 121.72 (16) | C20—C18—C16 | 120.58 (16) |
| C12—C6—C5  | 118.41 (16) | C20—C19—C14 | 120.30 (16) |
| C14—C7—C11 | 118.93 (14) | C18—C20—C19 | 119.15 (15) |
| C16—C7—C11 | 122.94 (14) | C15—C21—C22 | 120.8 (2)   |
| C16—C7—C14 | 118.12 (14) | C12—C22—C21 | 120.49 (19) |
| C17—C8—C4  | 120.84 (15) | C26—C23—C25 | 119.3 (2)   |
| C17—C8—C24 | 118.19 (17) | C26—C24—C8  | 120.82 (19) |
| C24—C8—C4  | 120.97 (16) | C23—C25—C17 | 120.7 (2)   |
| C10—C9—C5  | 119.36 (15) | C23—C26—C24 | 120.67 (19) |

- **$^1\text{H}$  and  $^{13}\text{C}$  NMR Spectra of compounds**

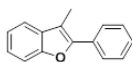

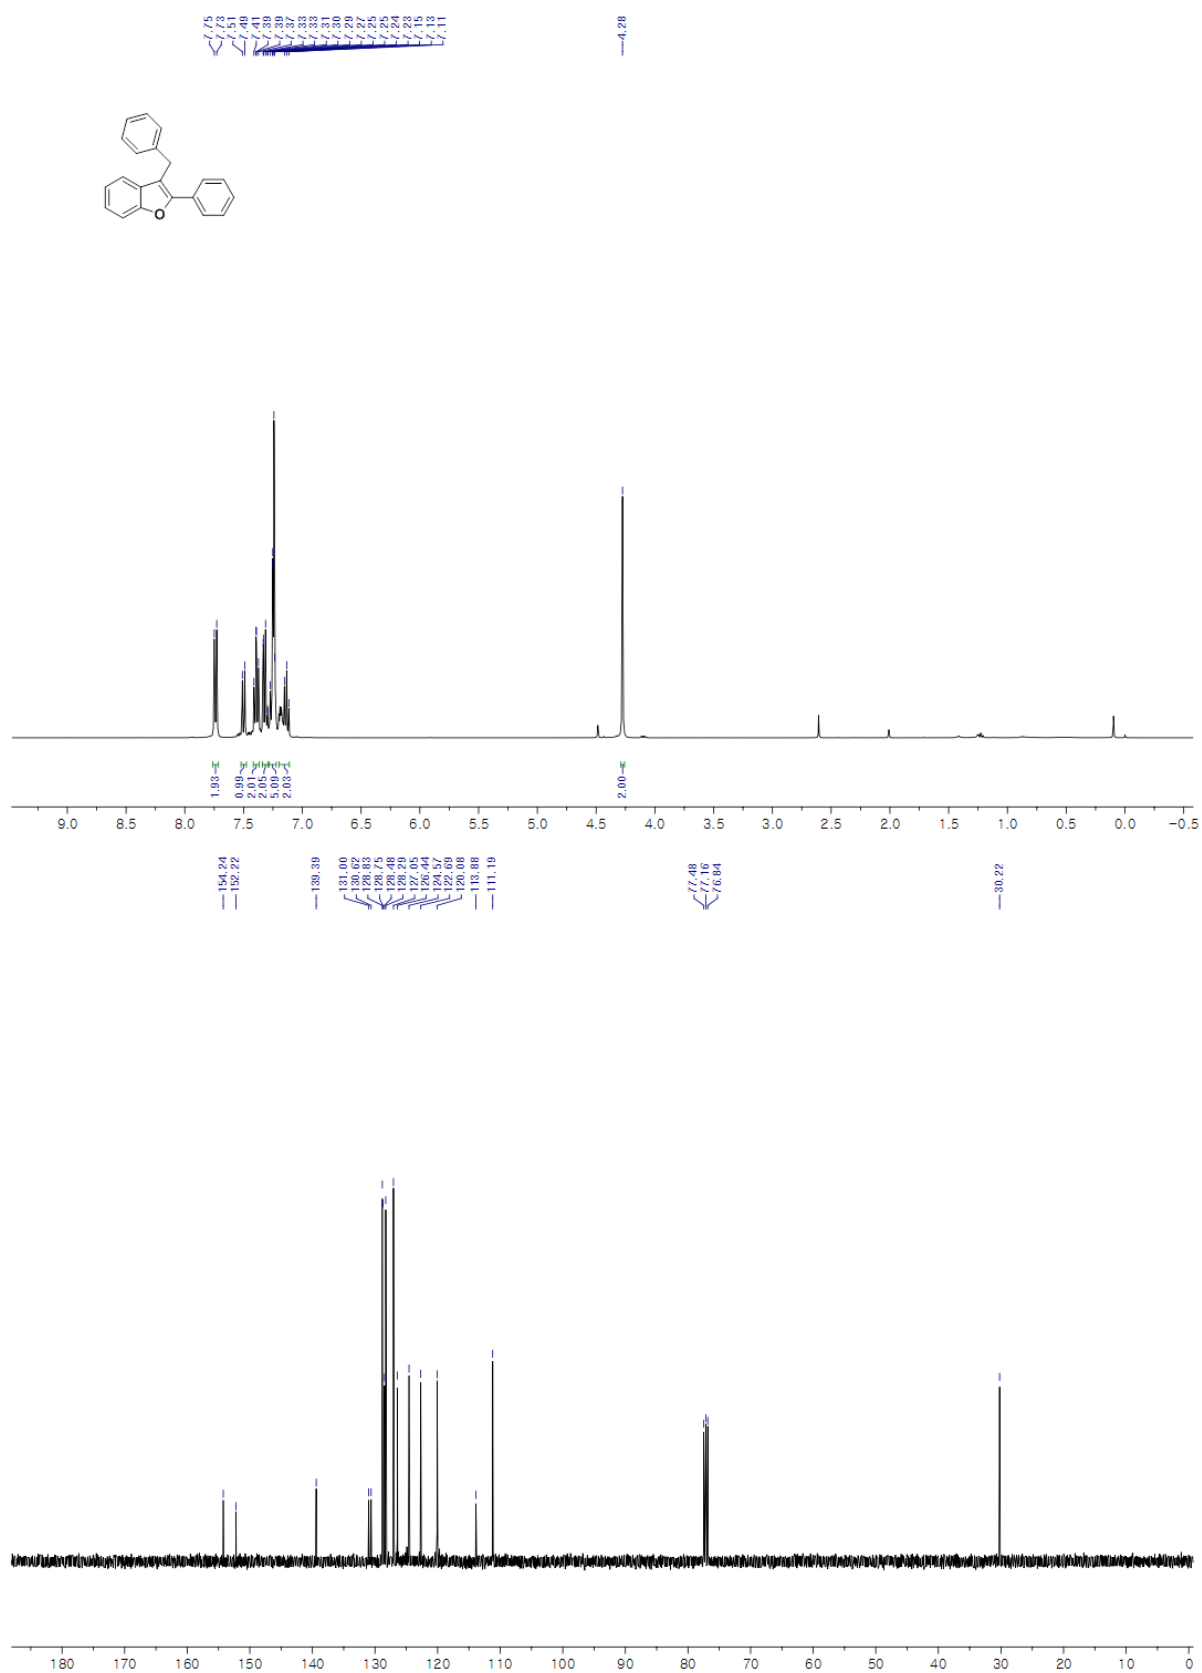



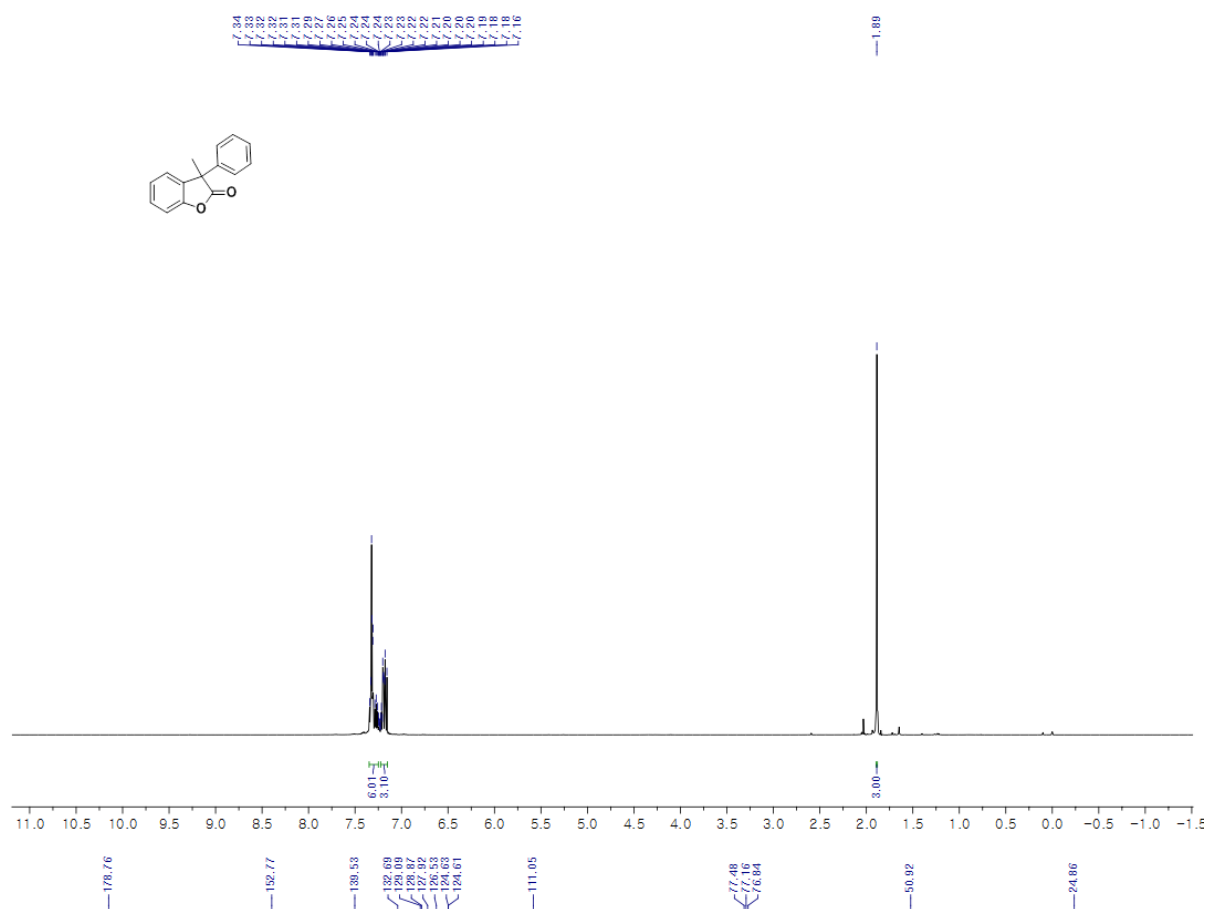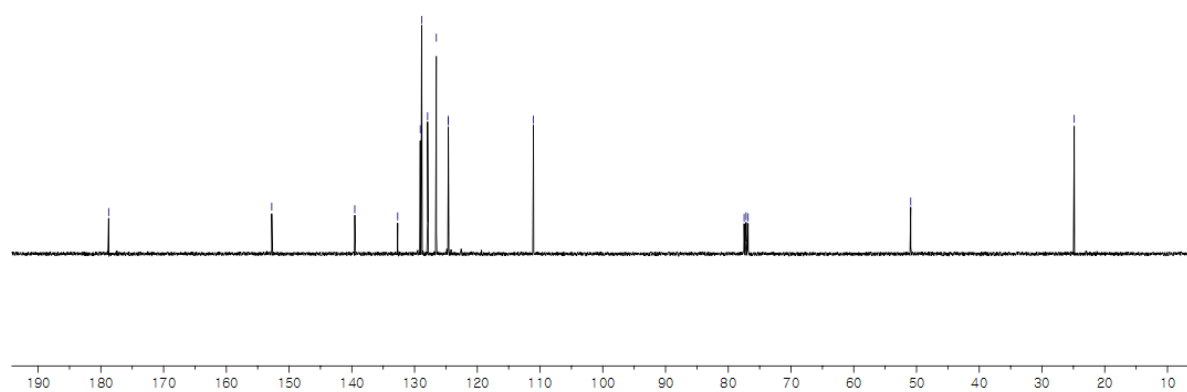

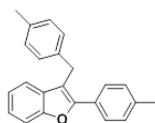

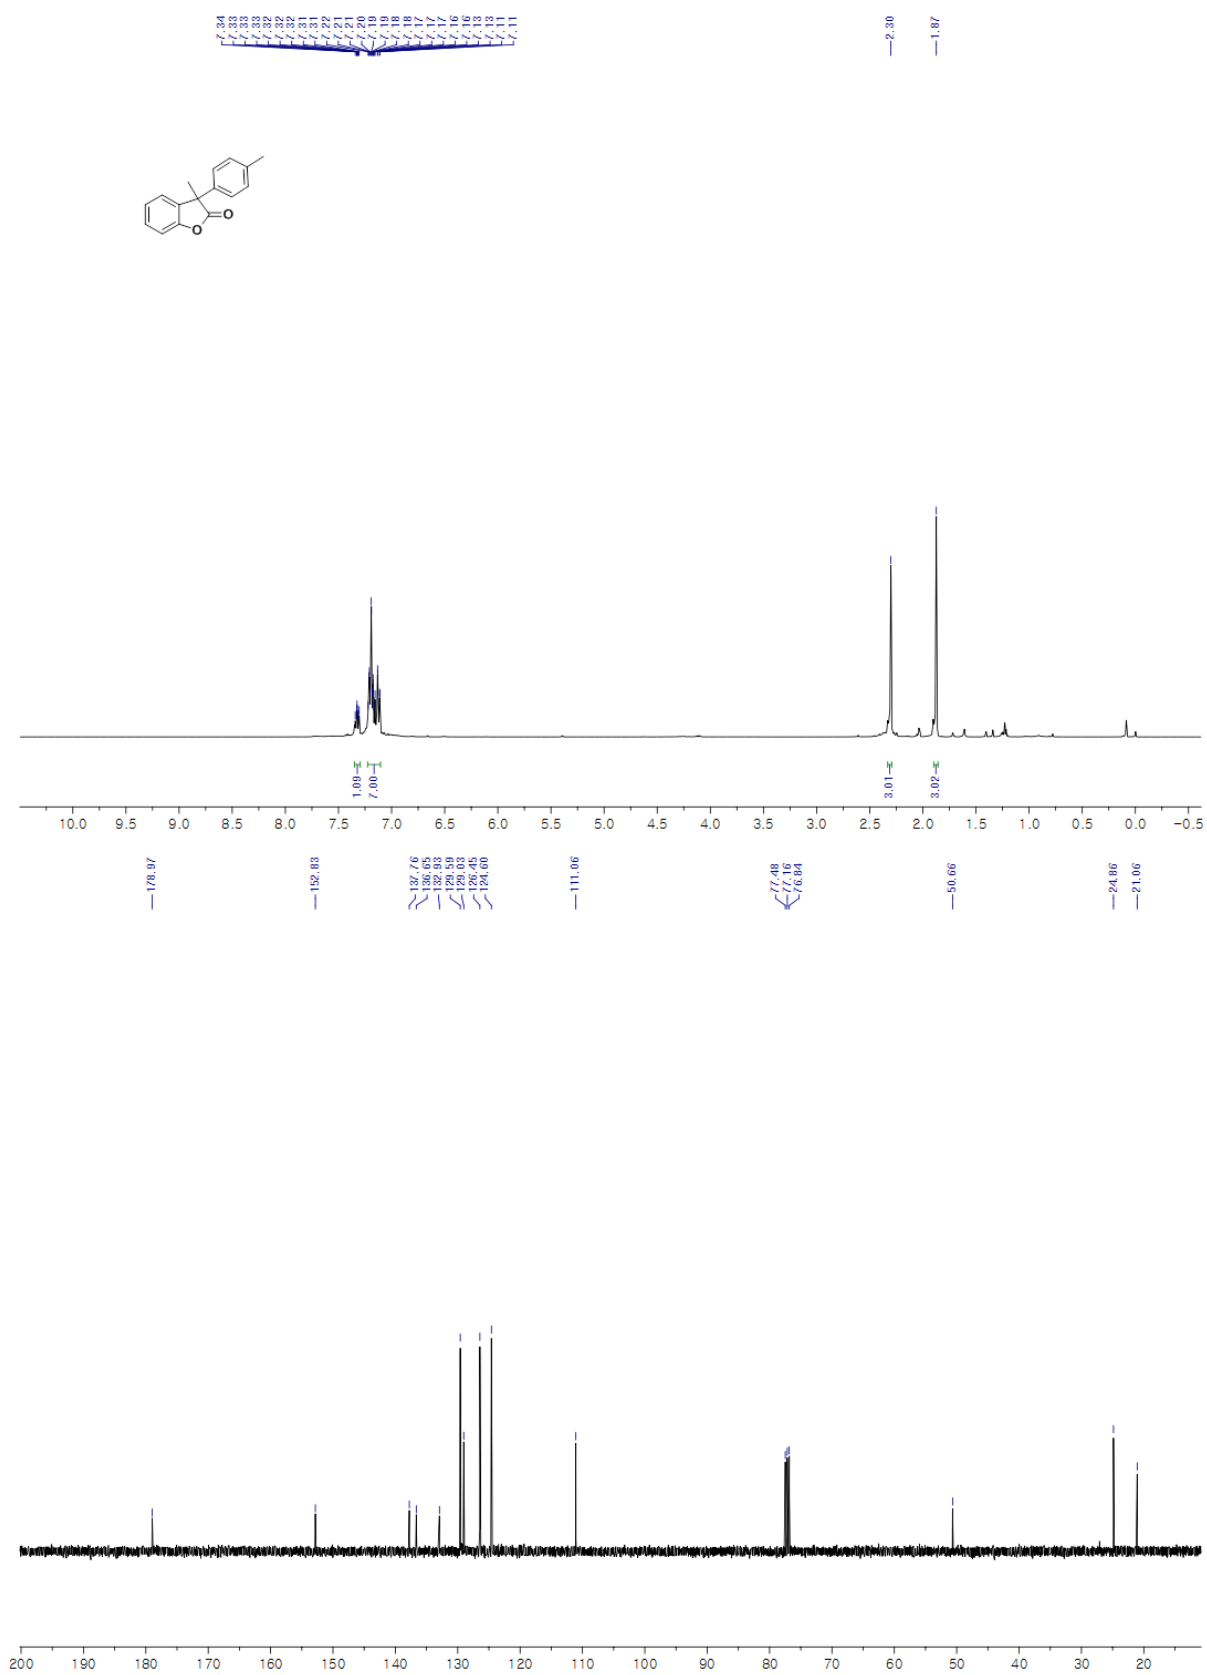

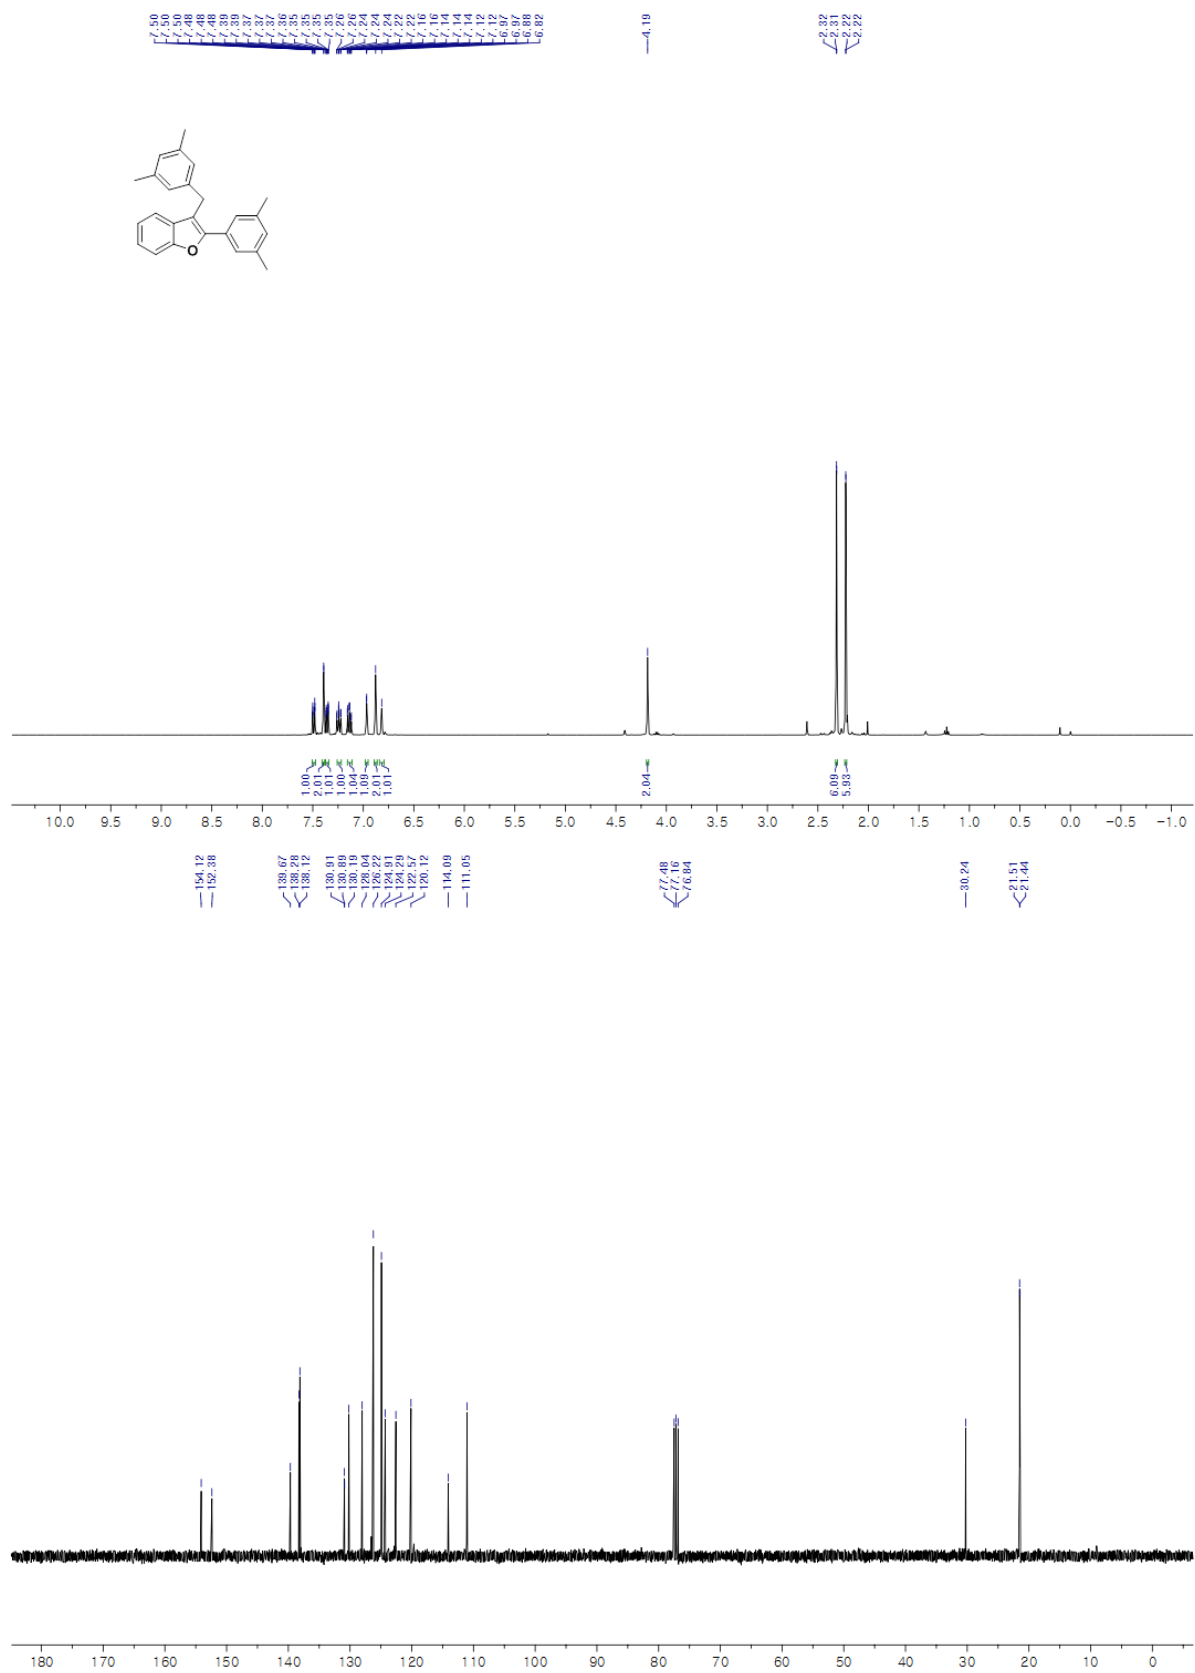

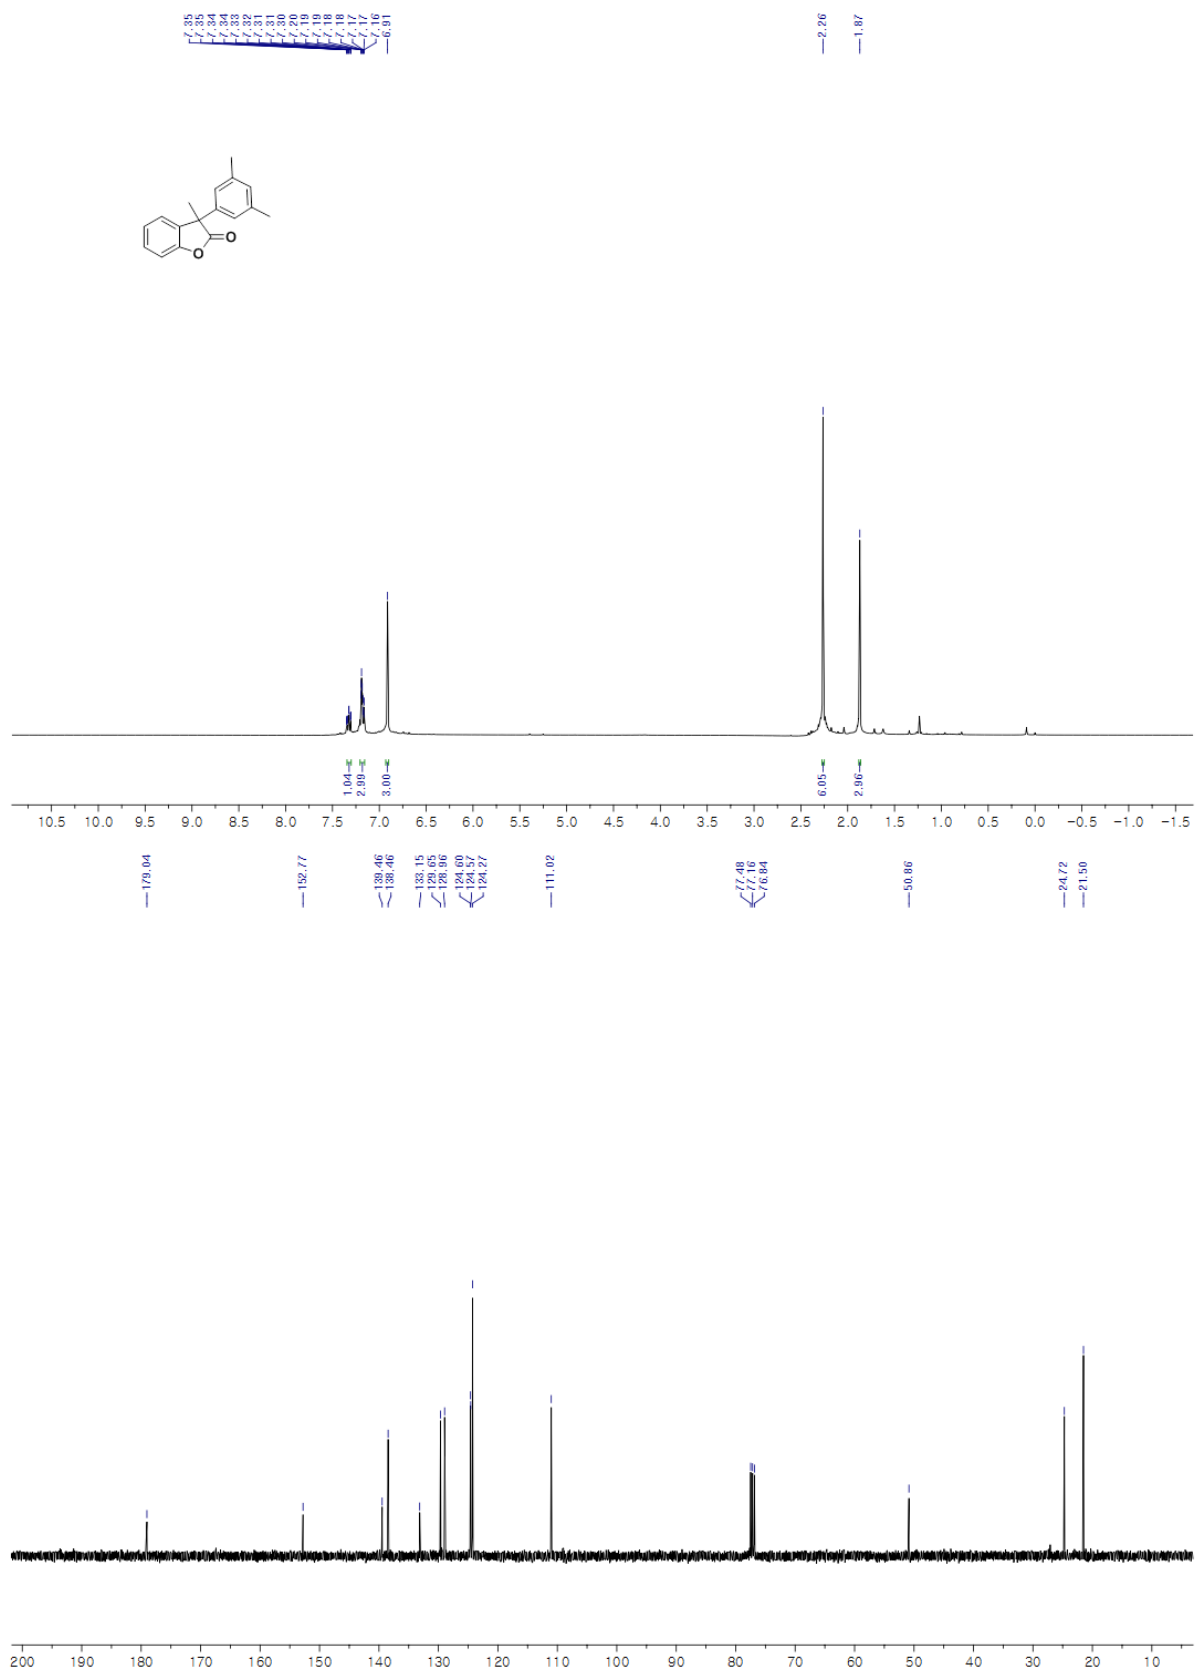

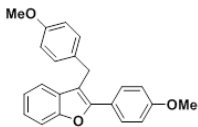

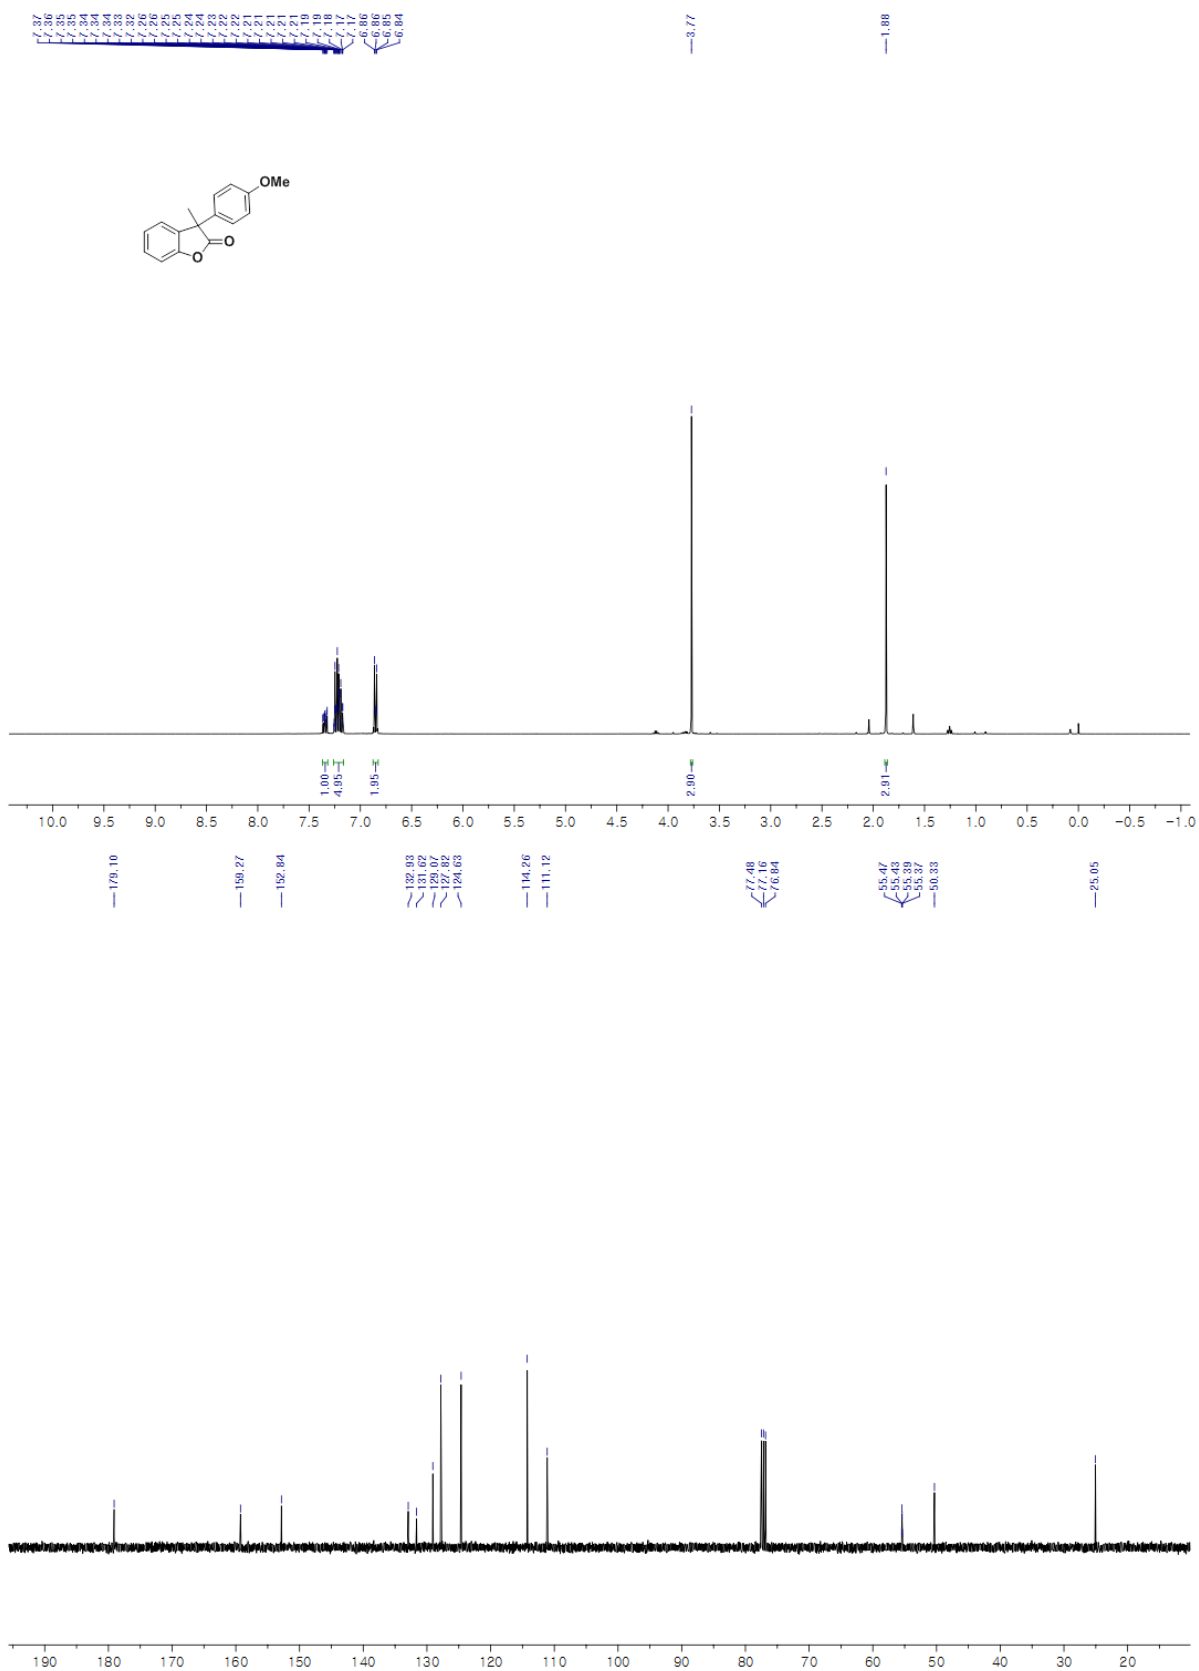

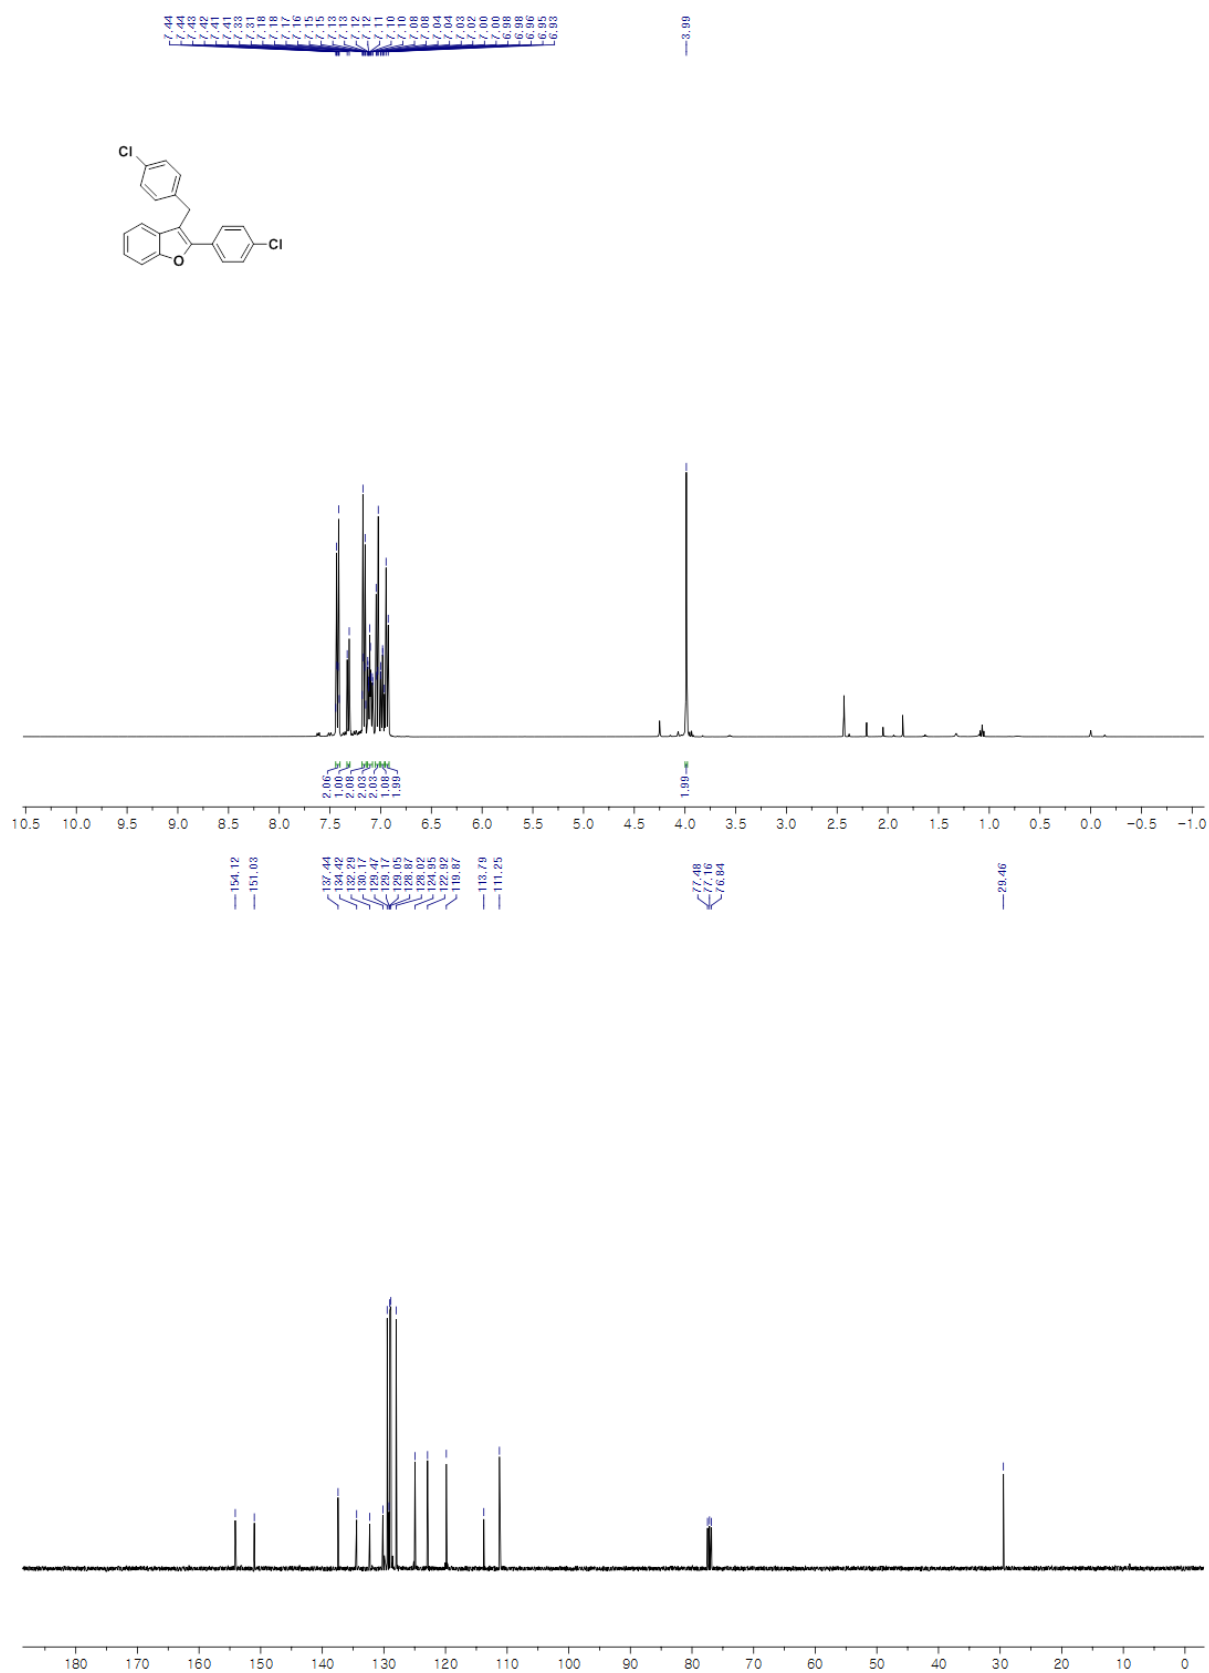



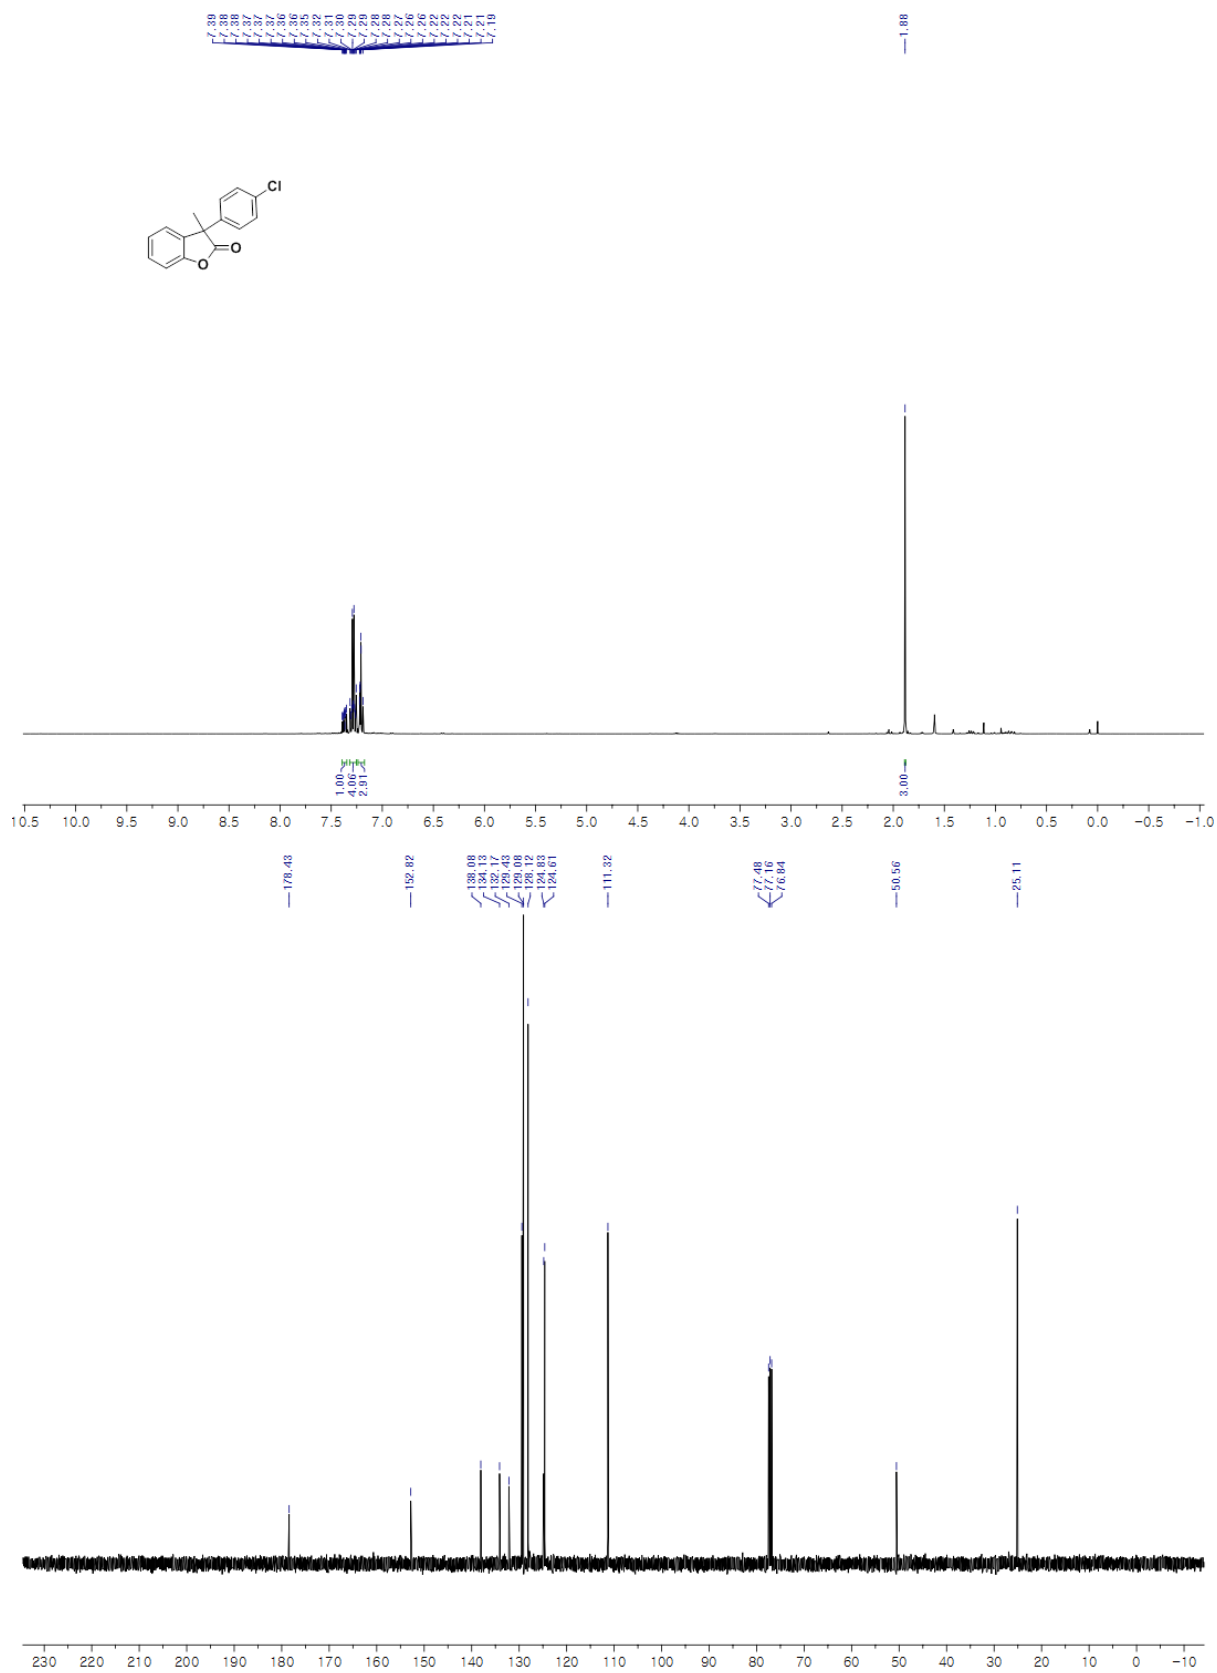

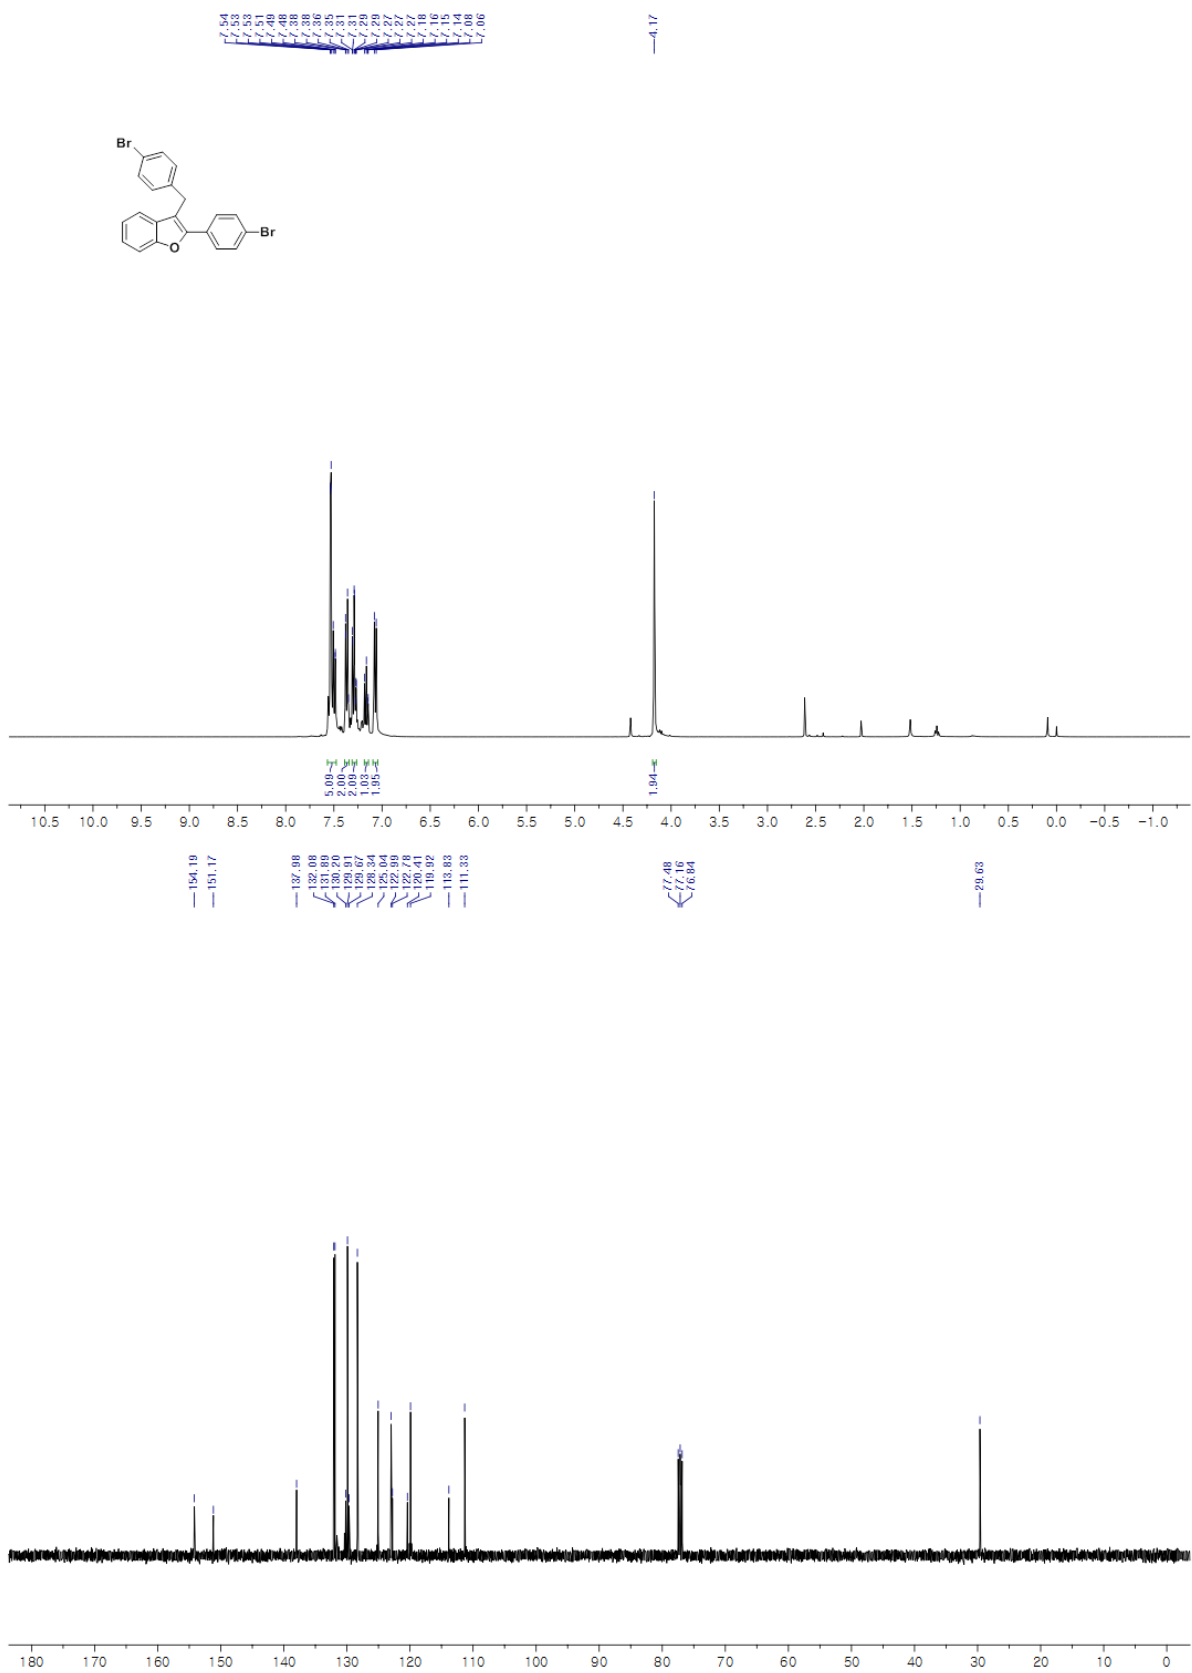

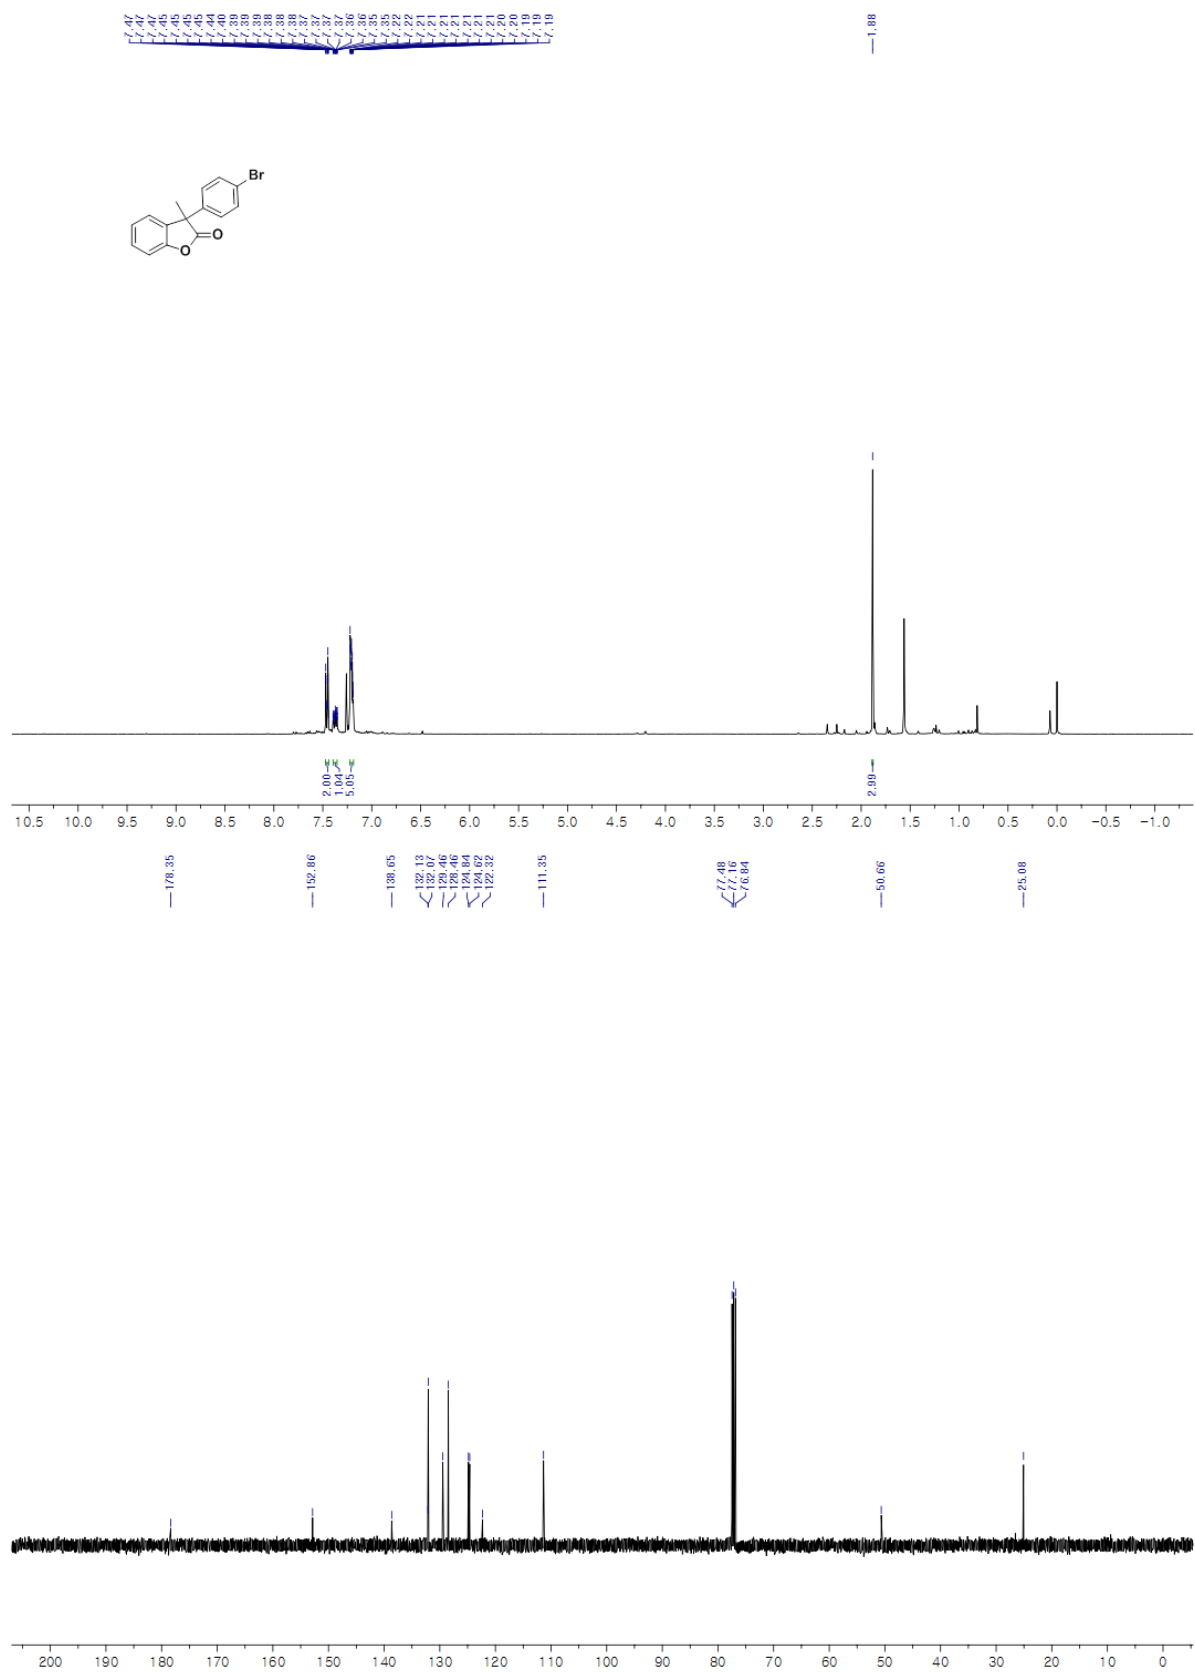

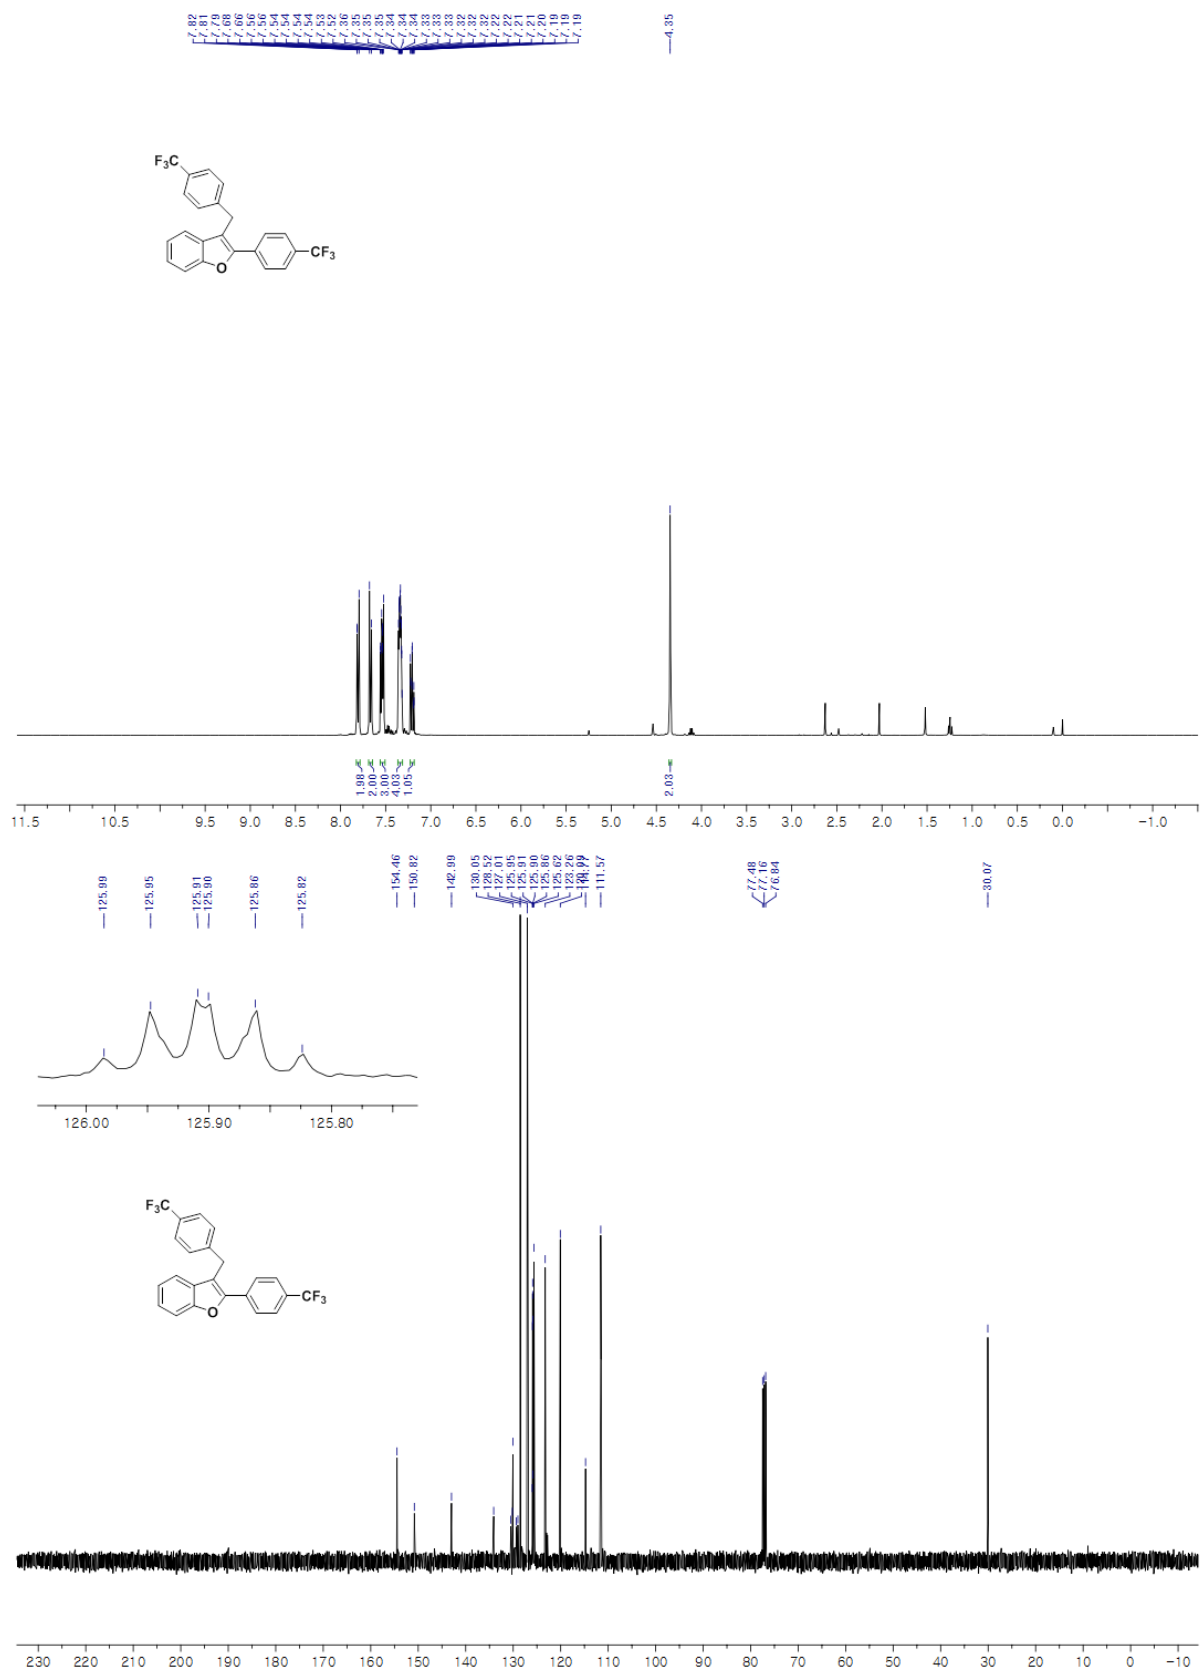

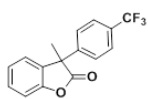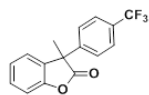

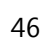

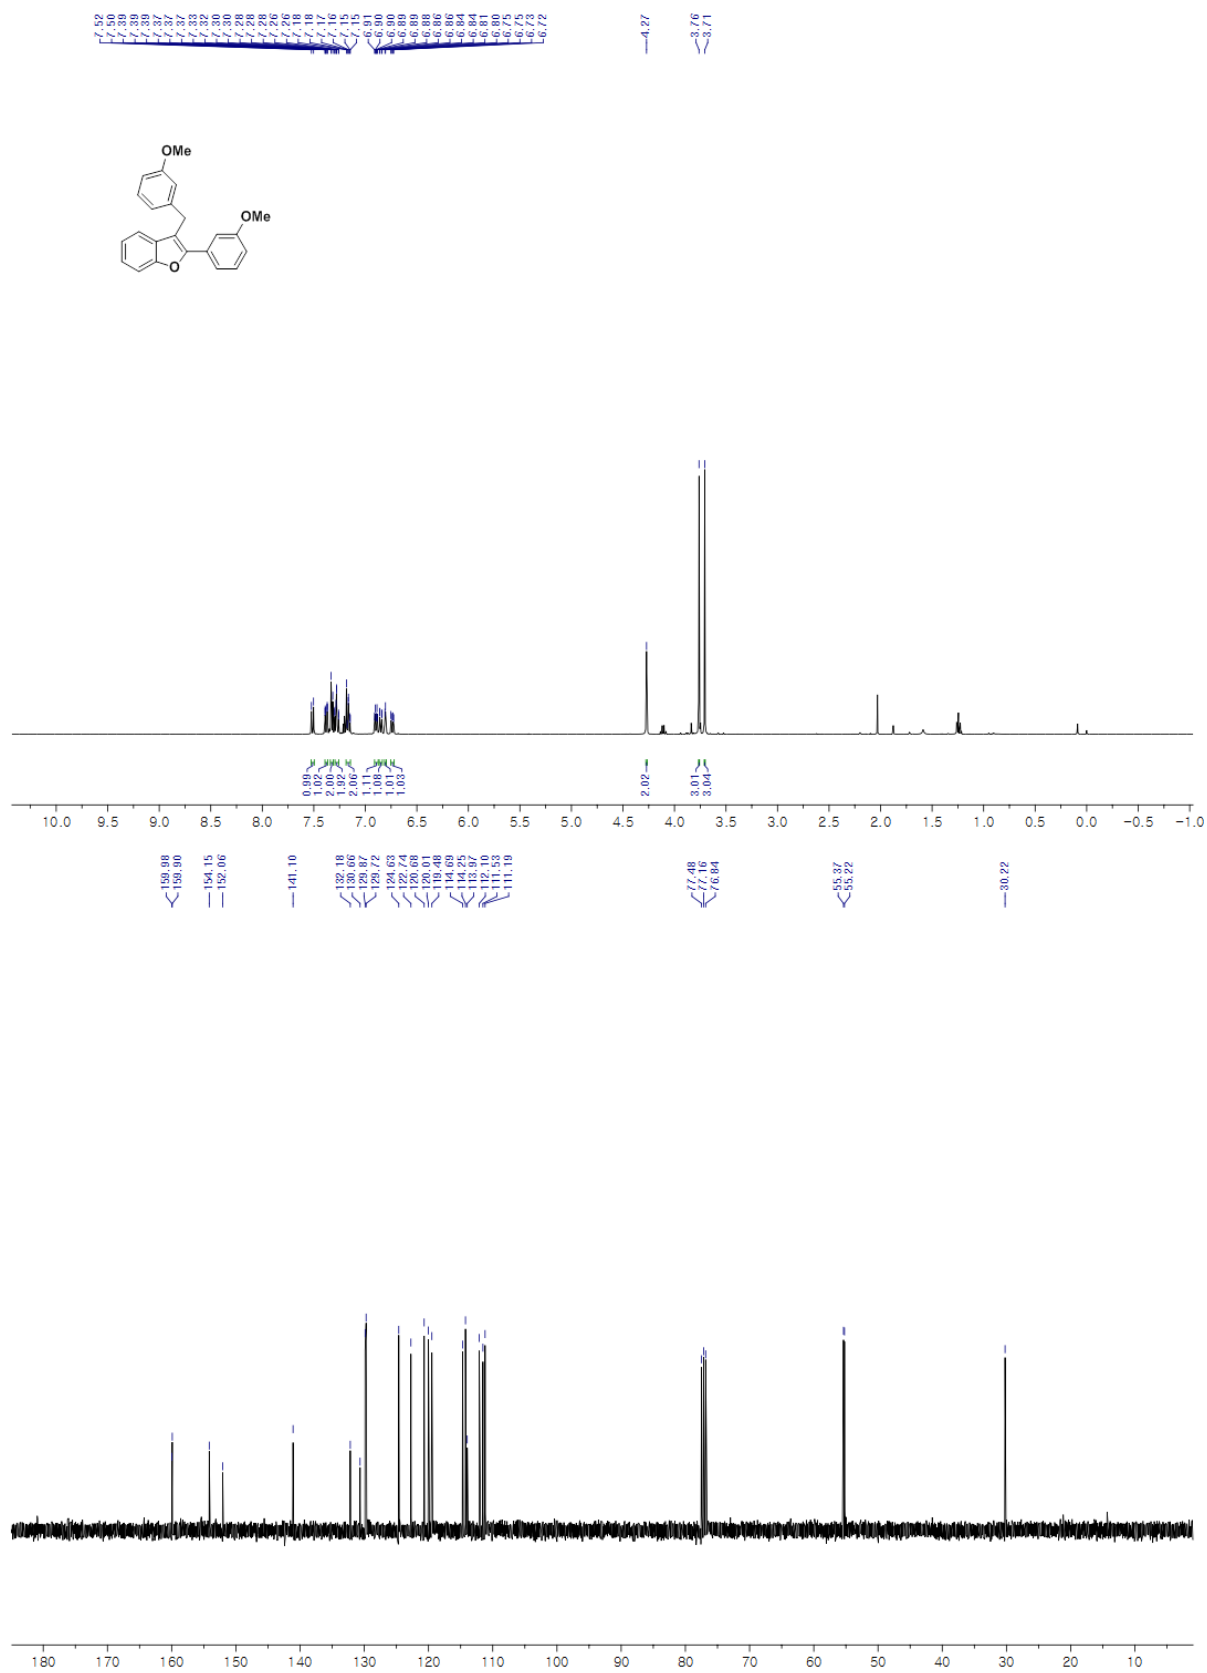

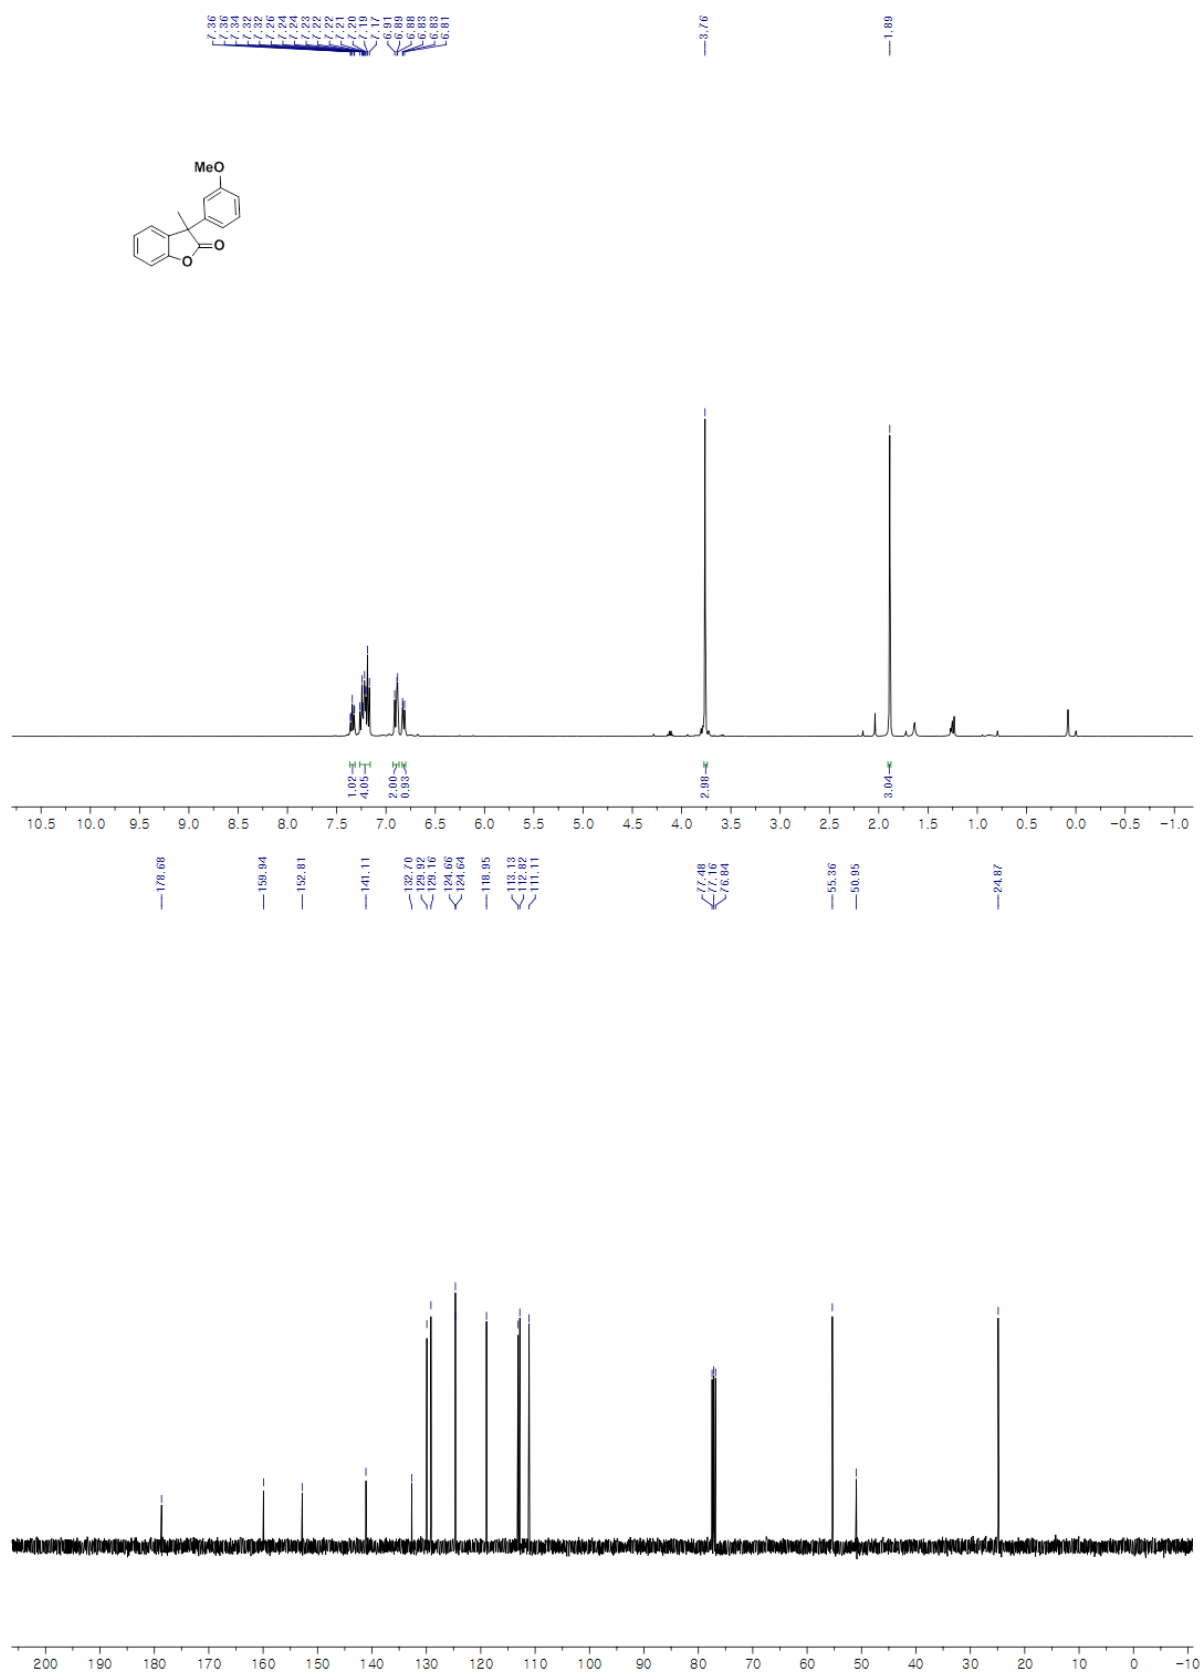



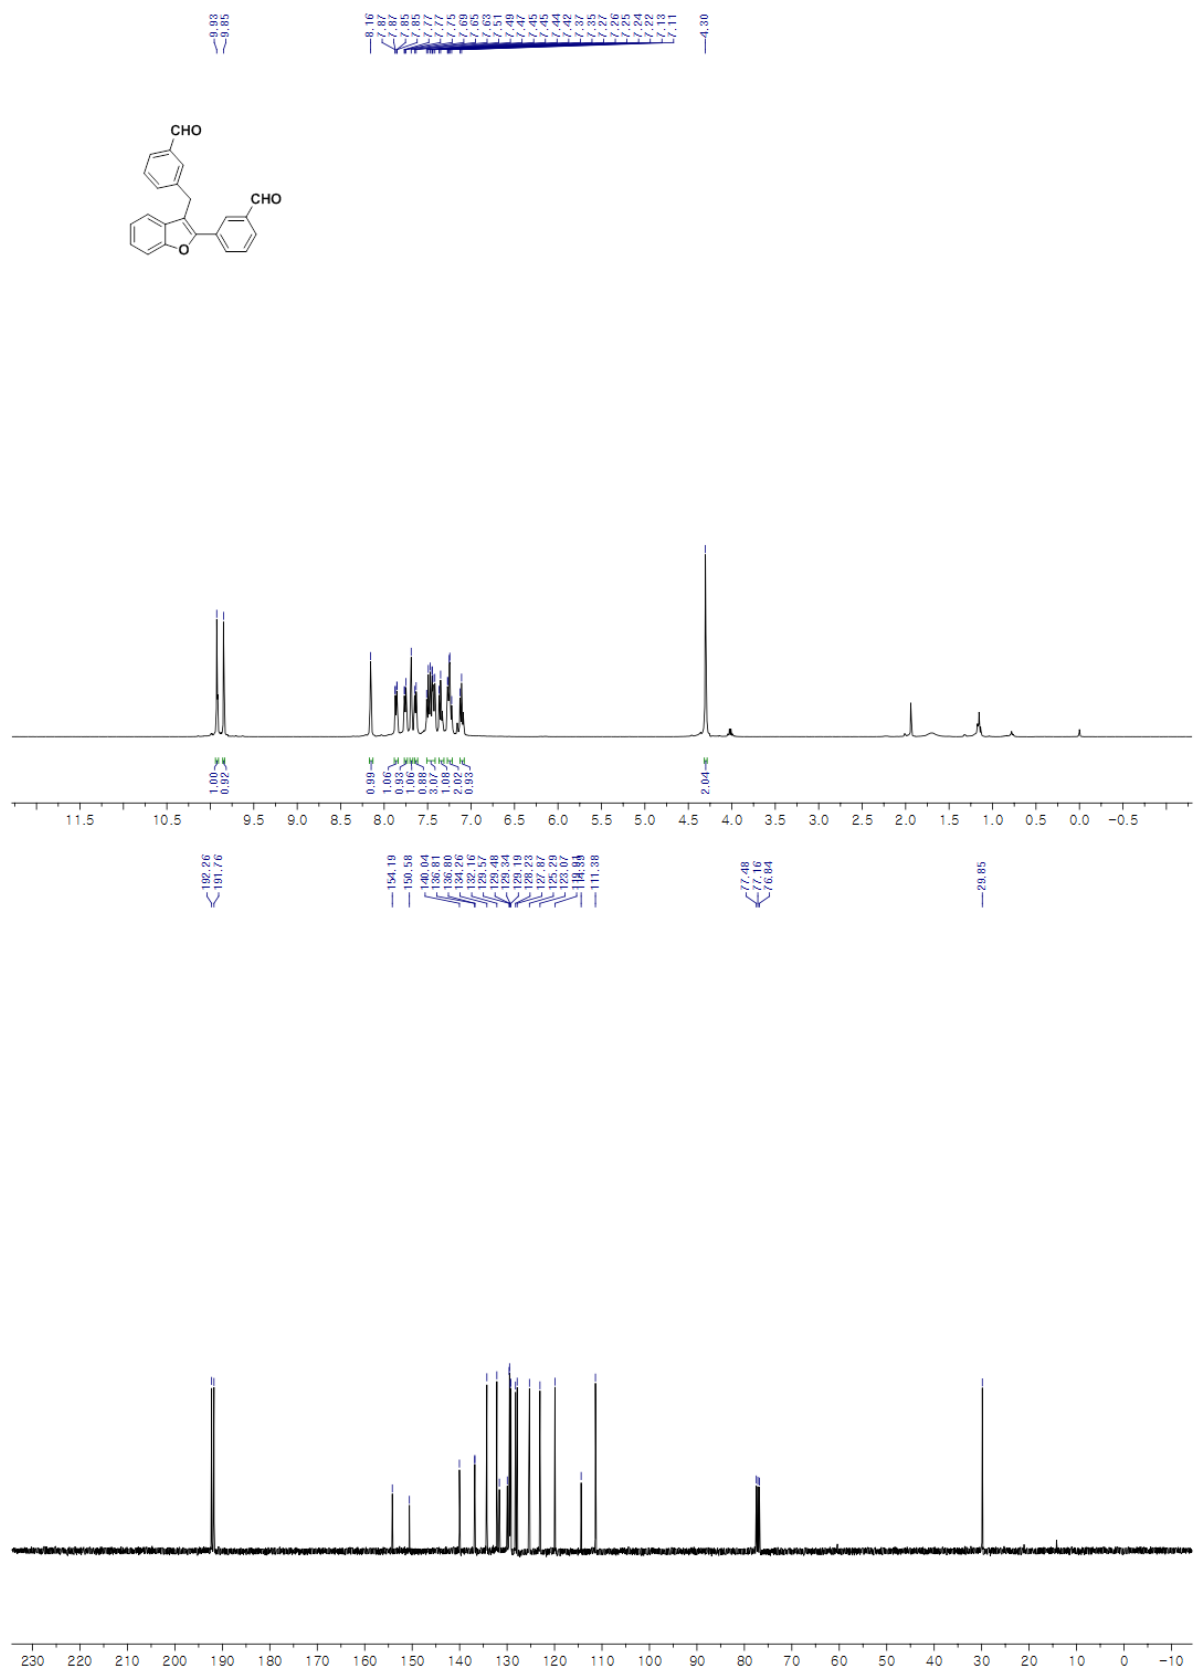

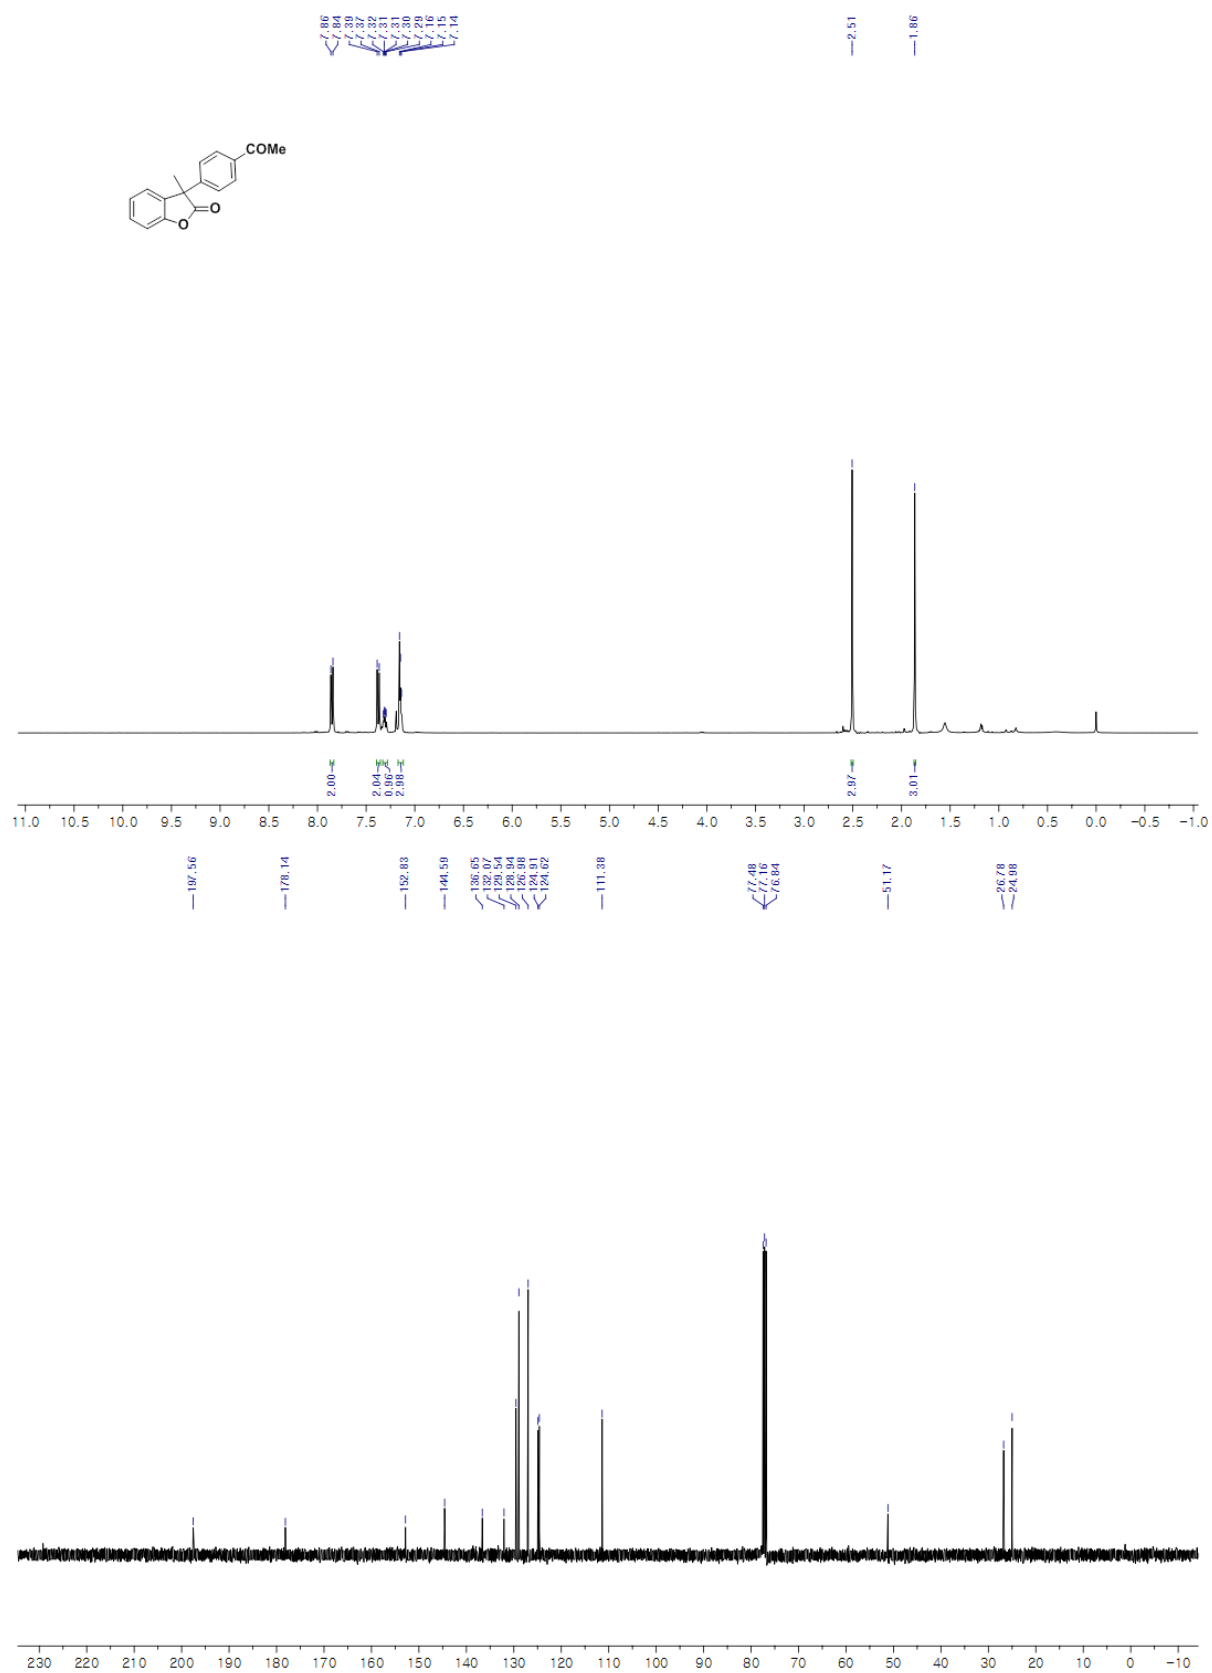

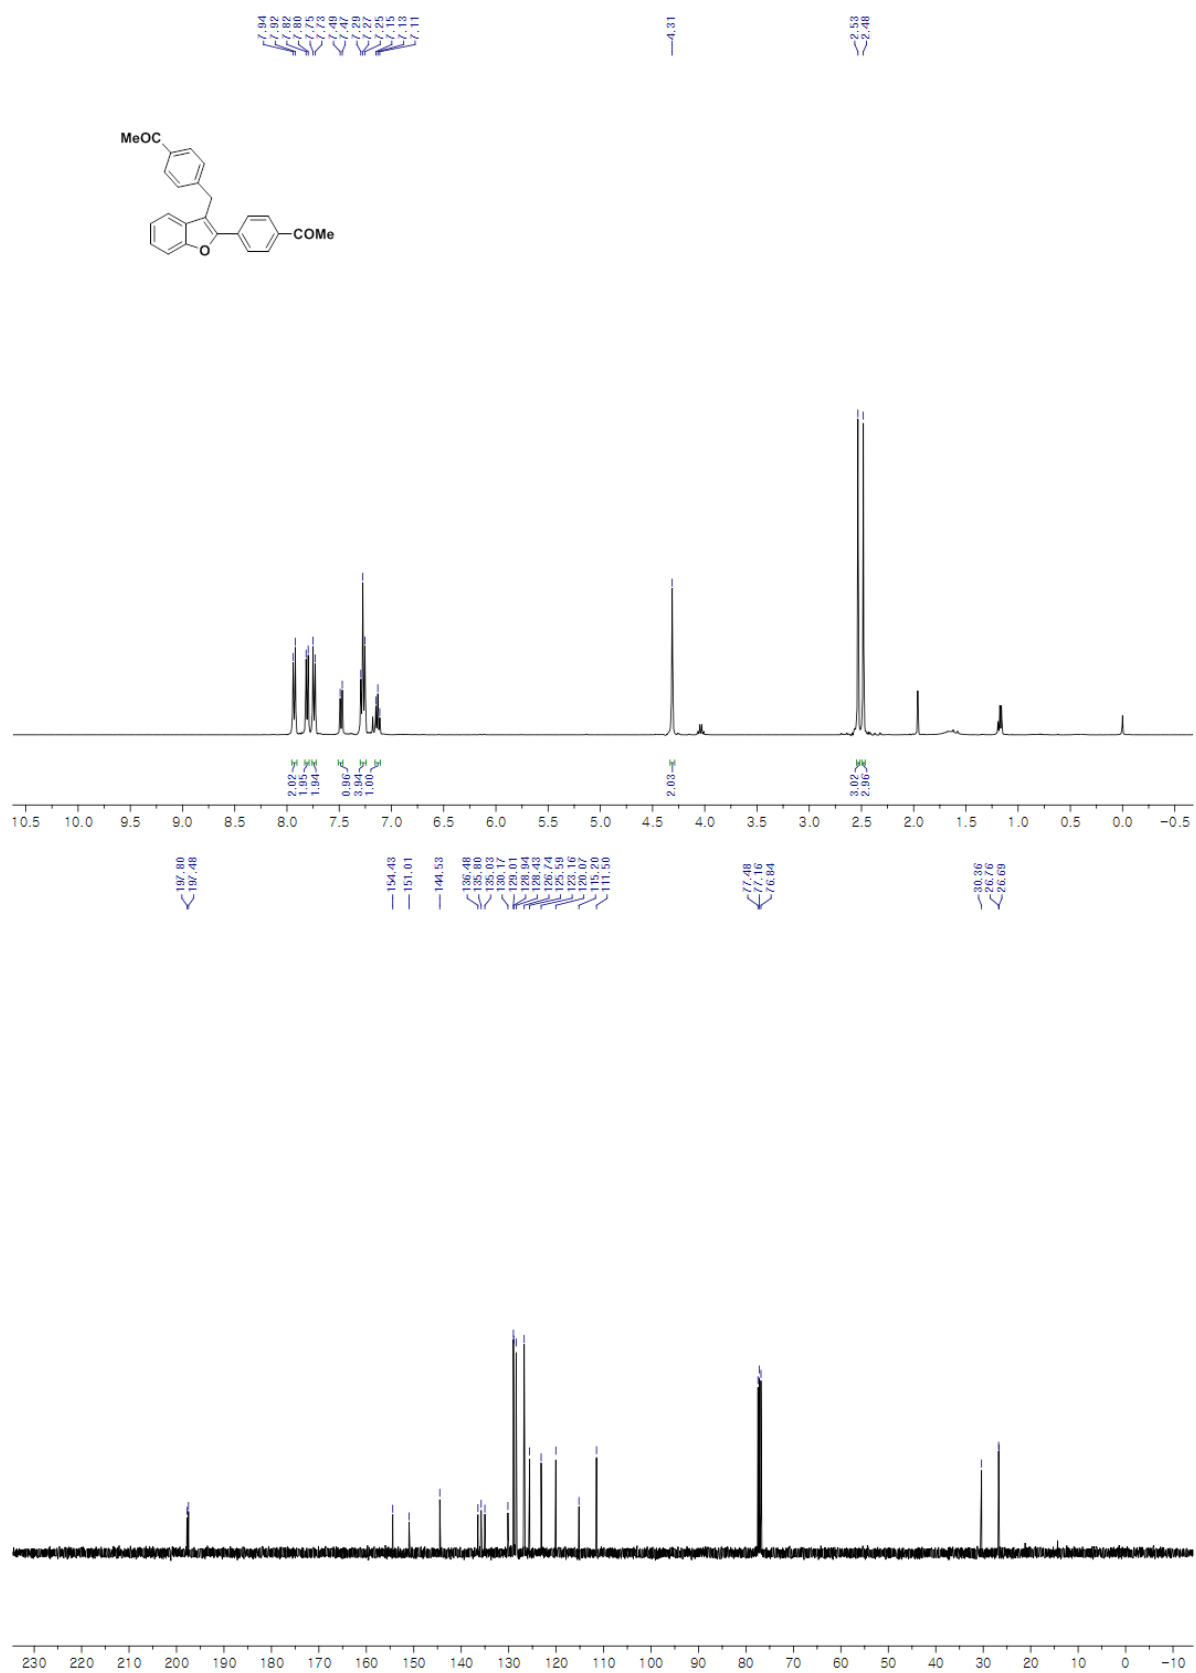

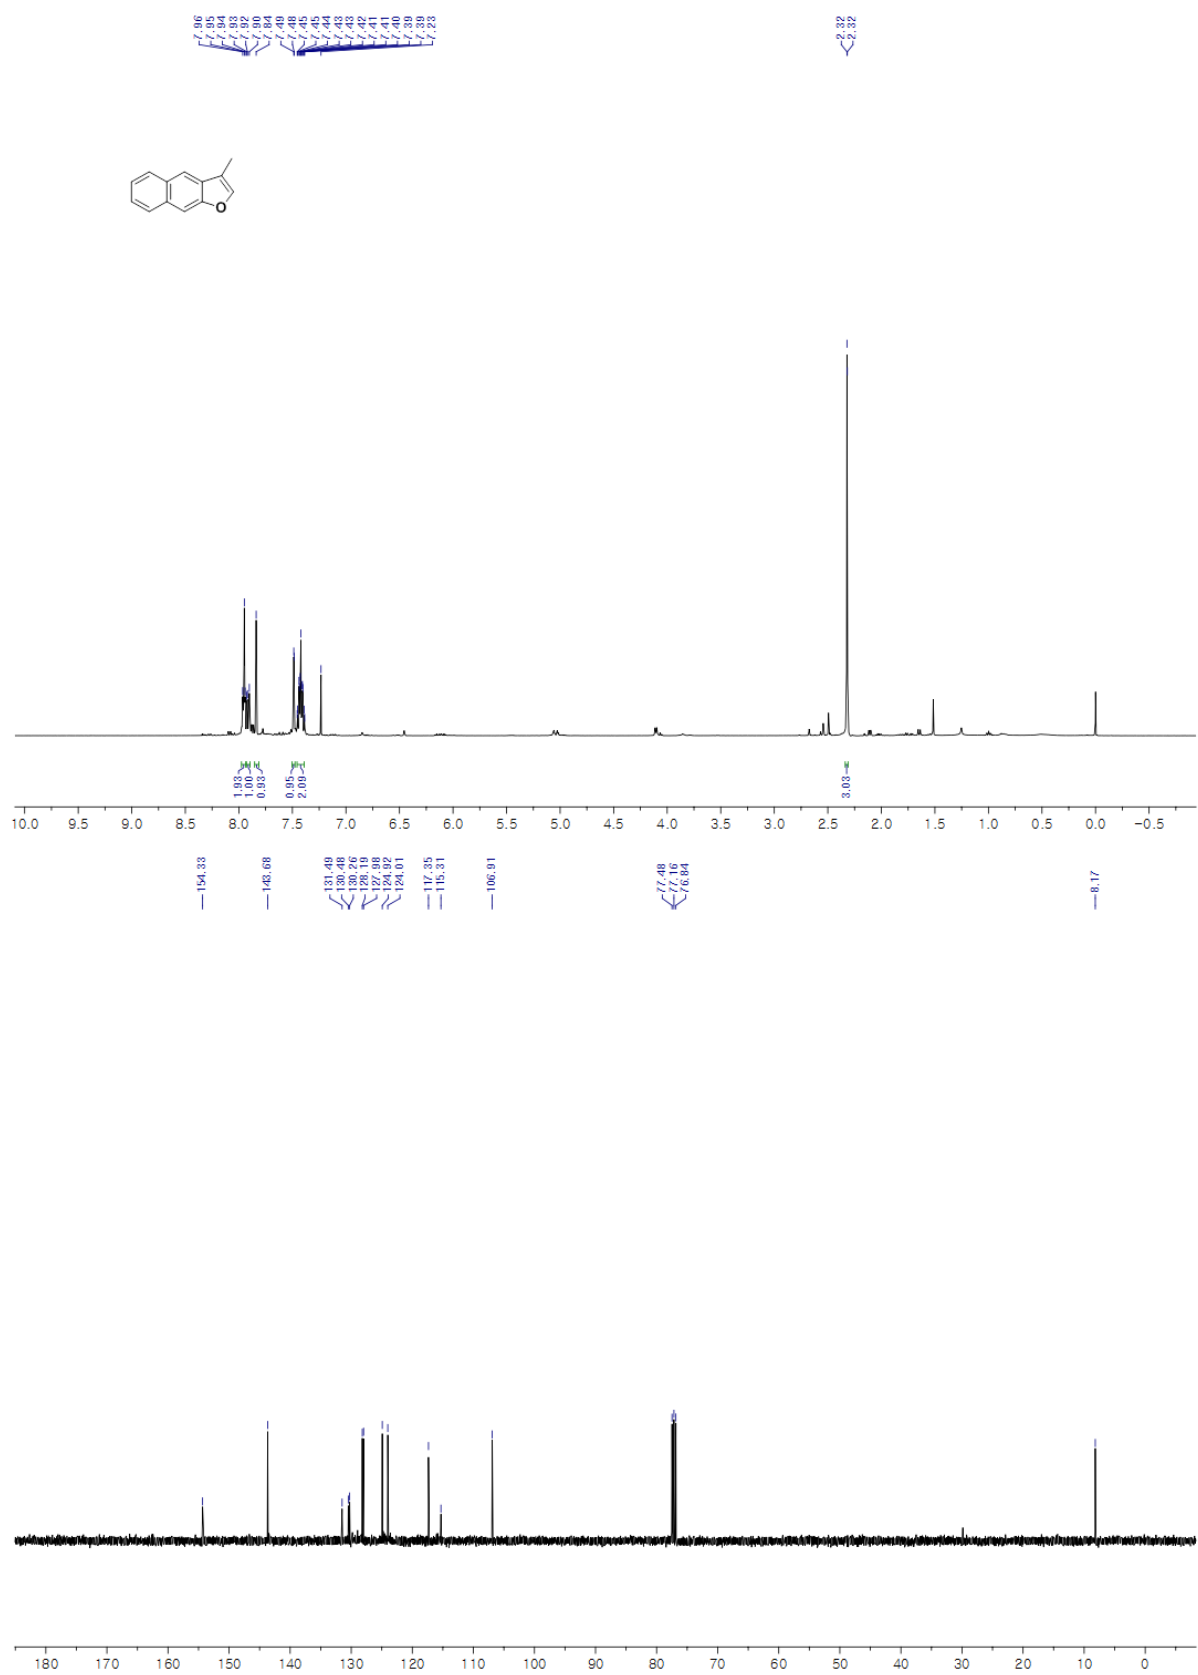

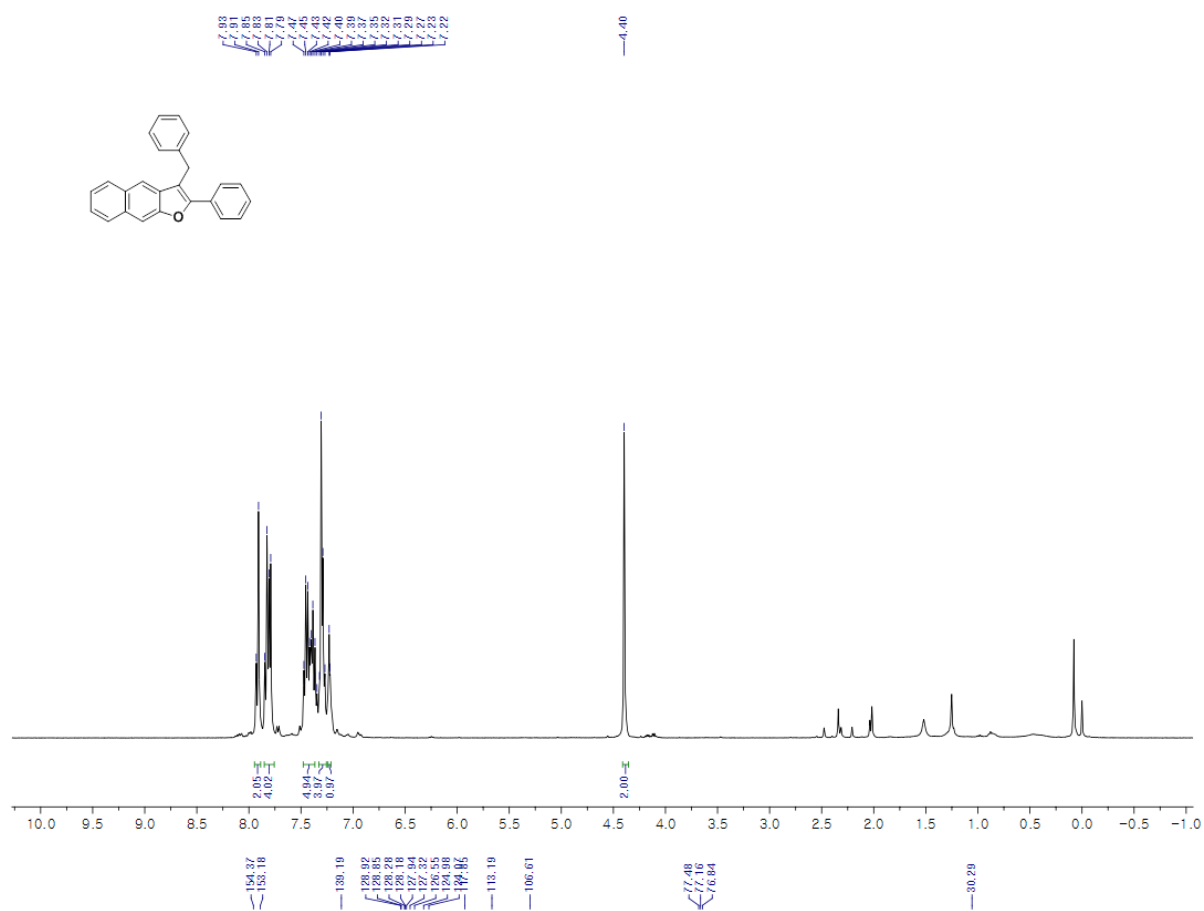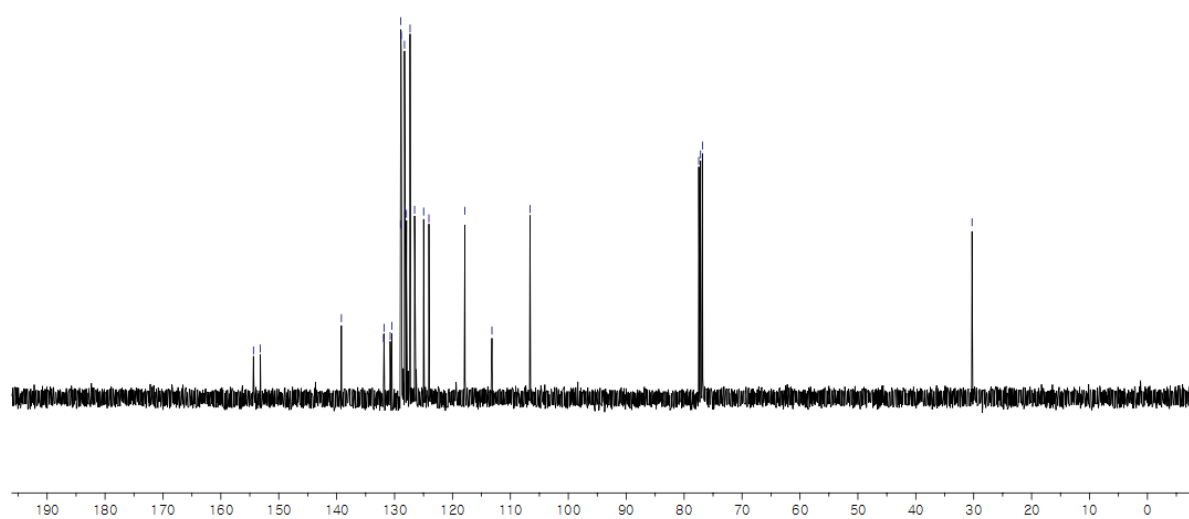

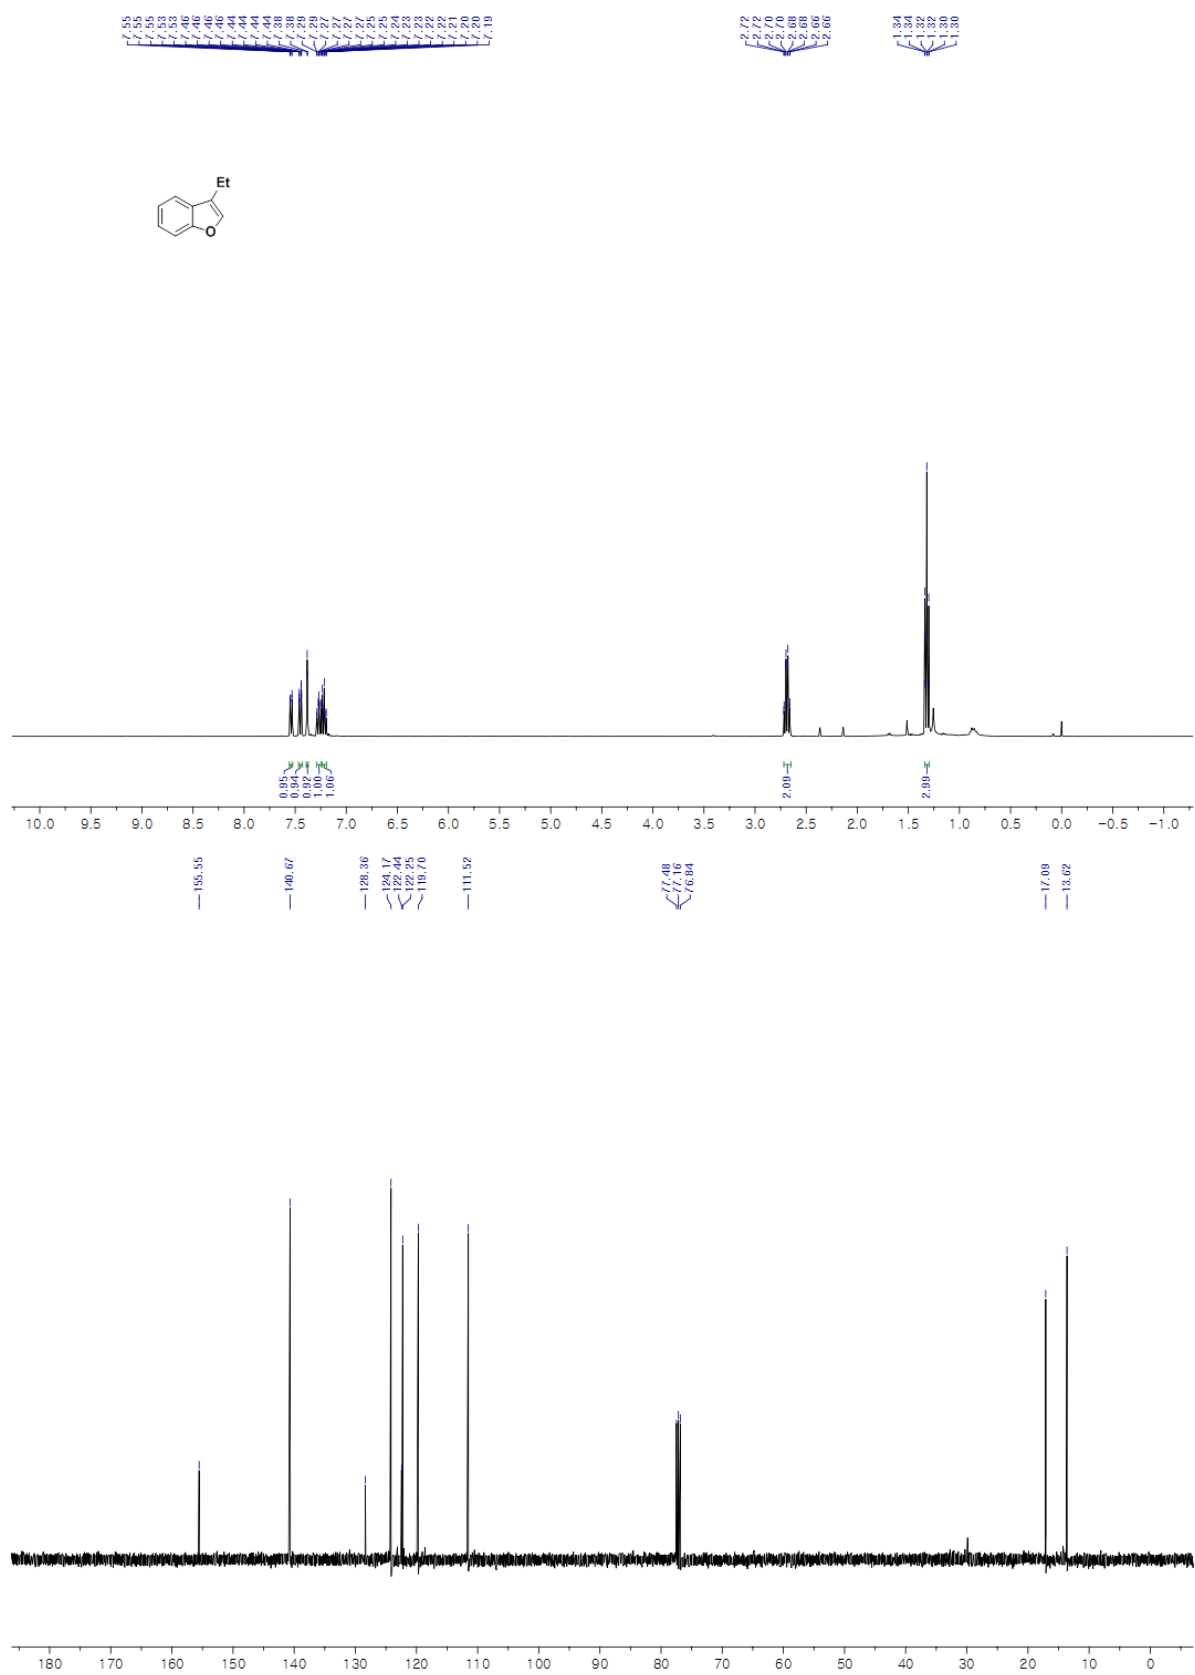

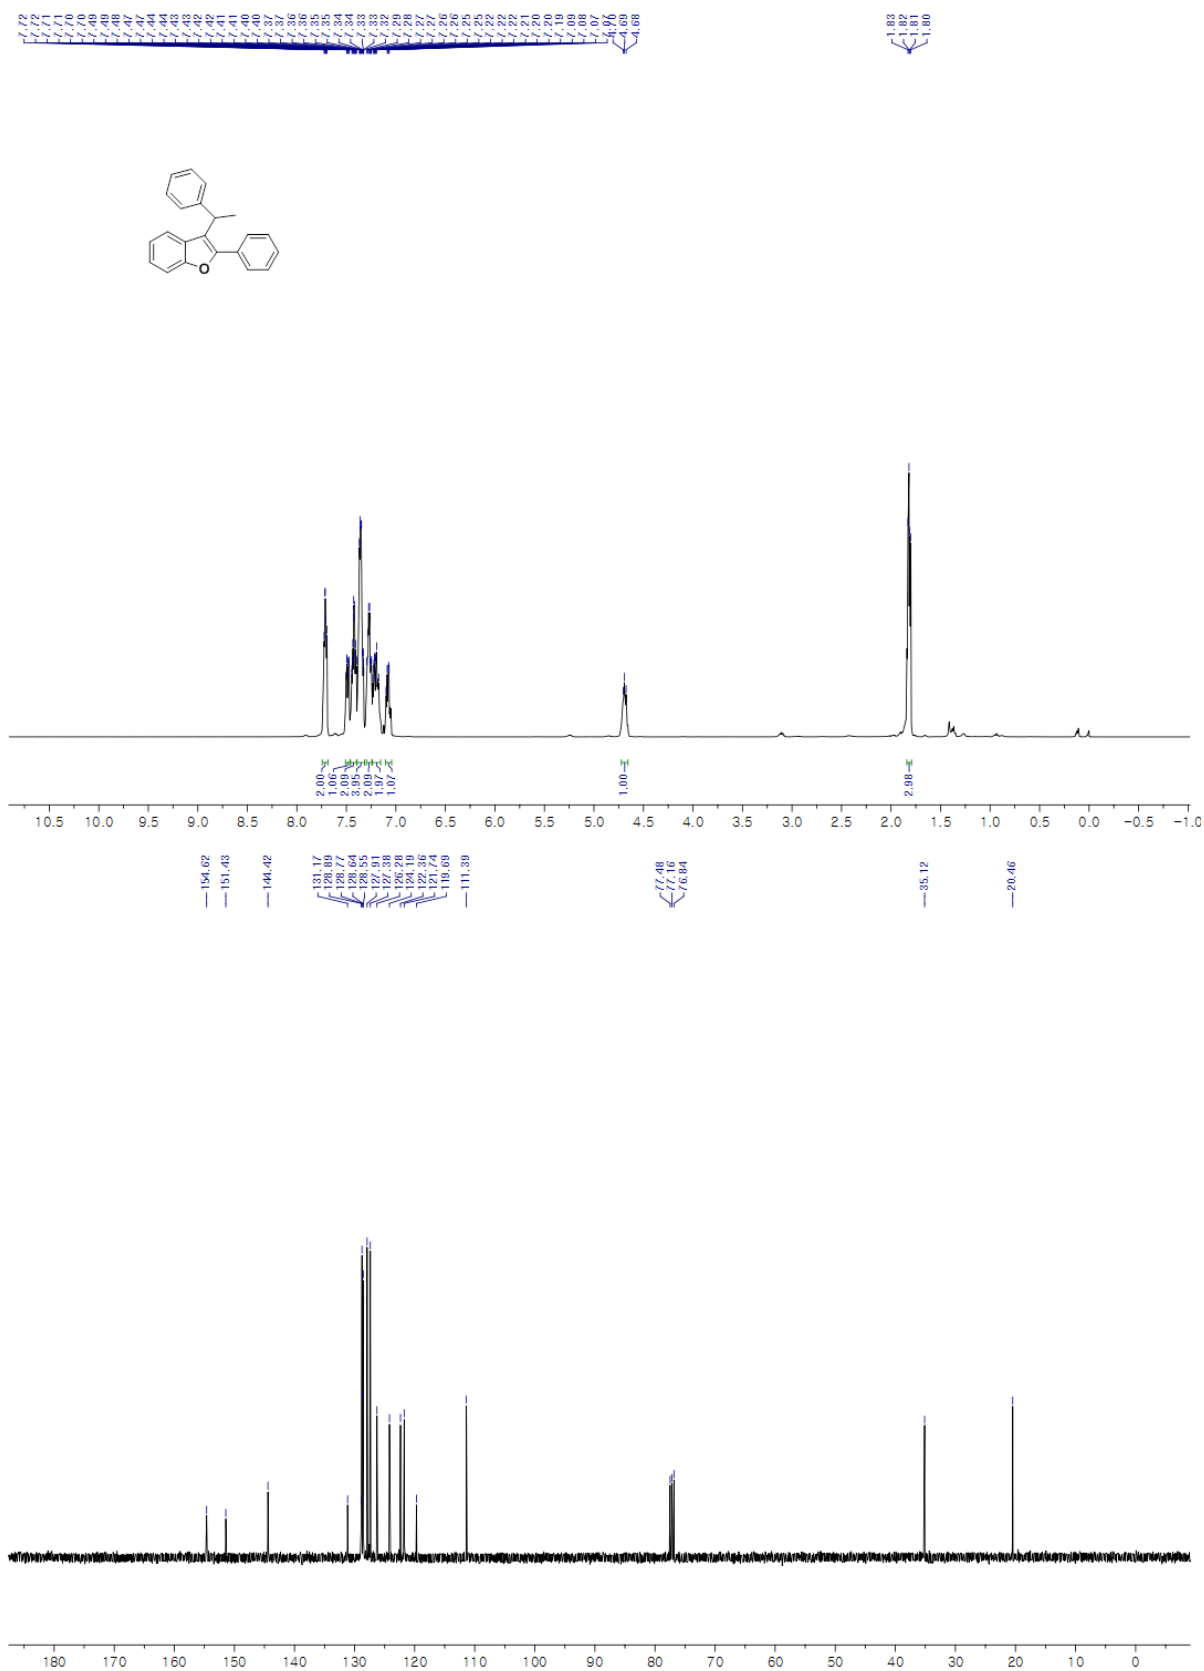

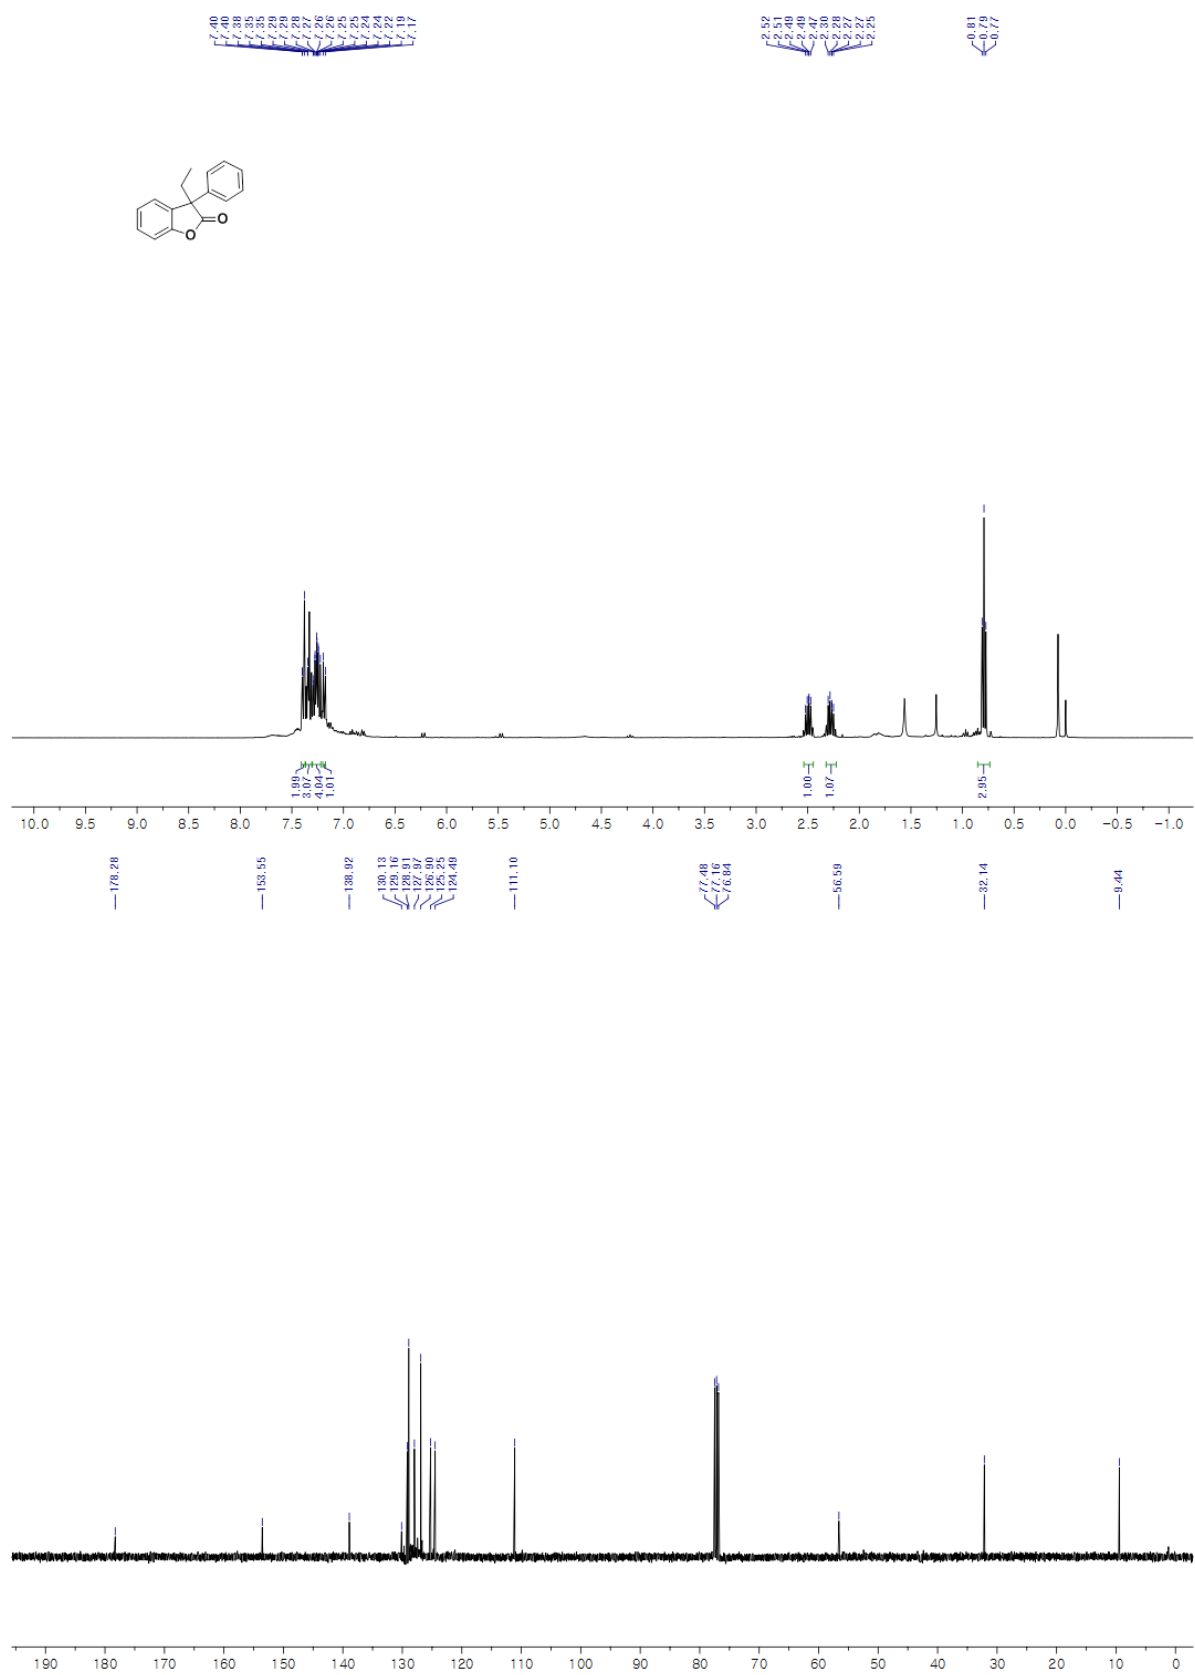



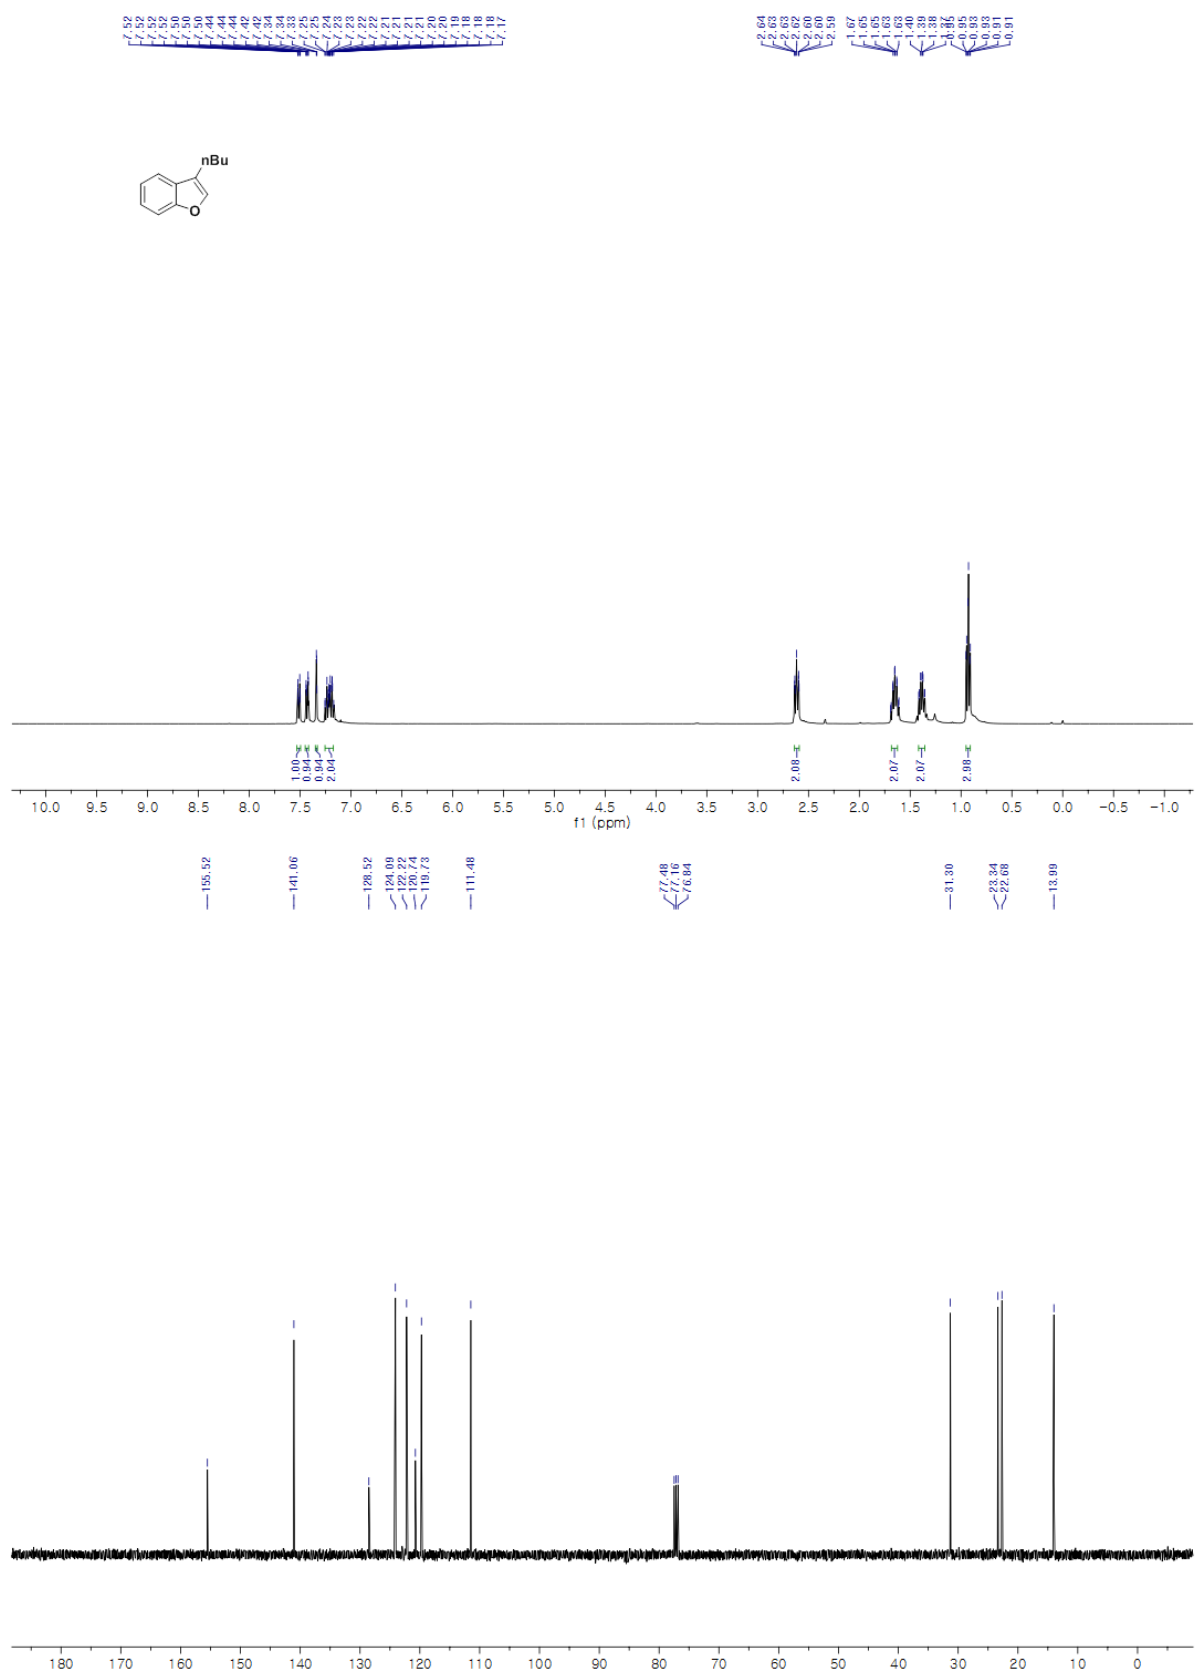

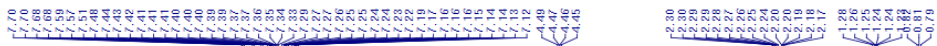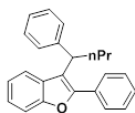

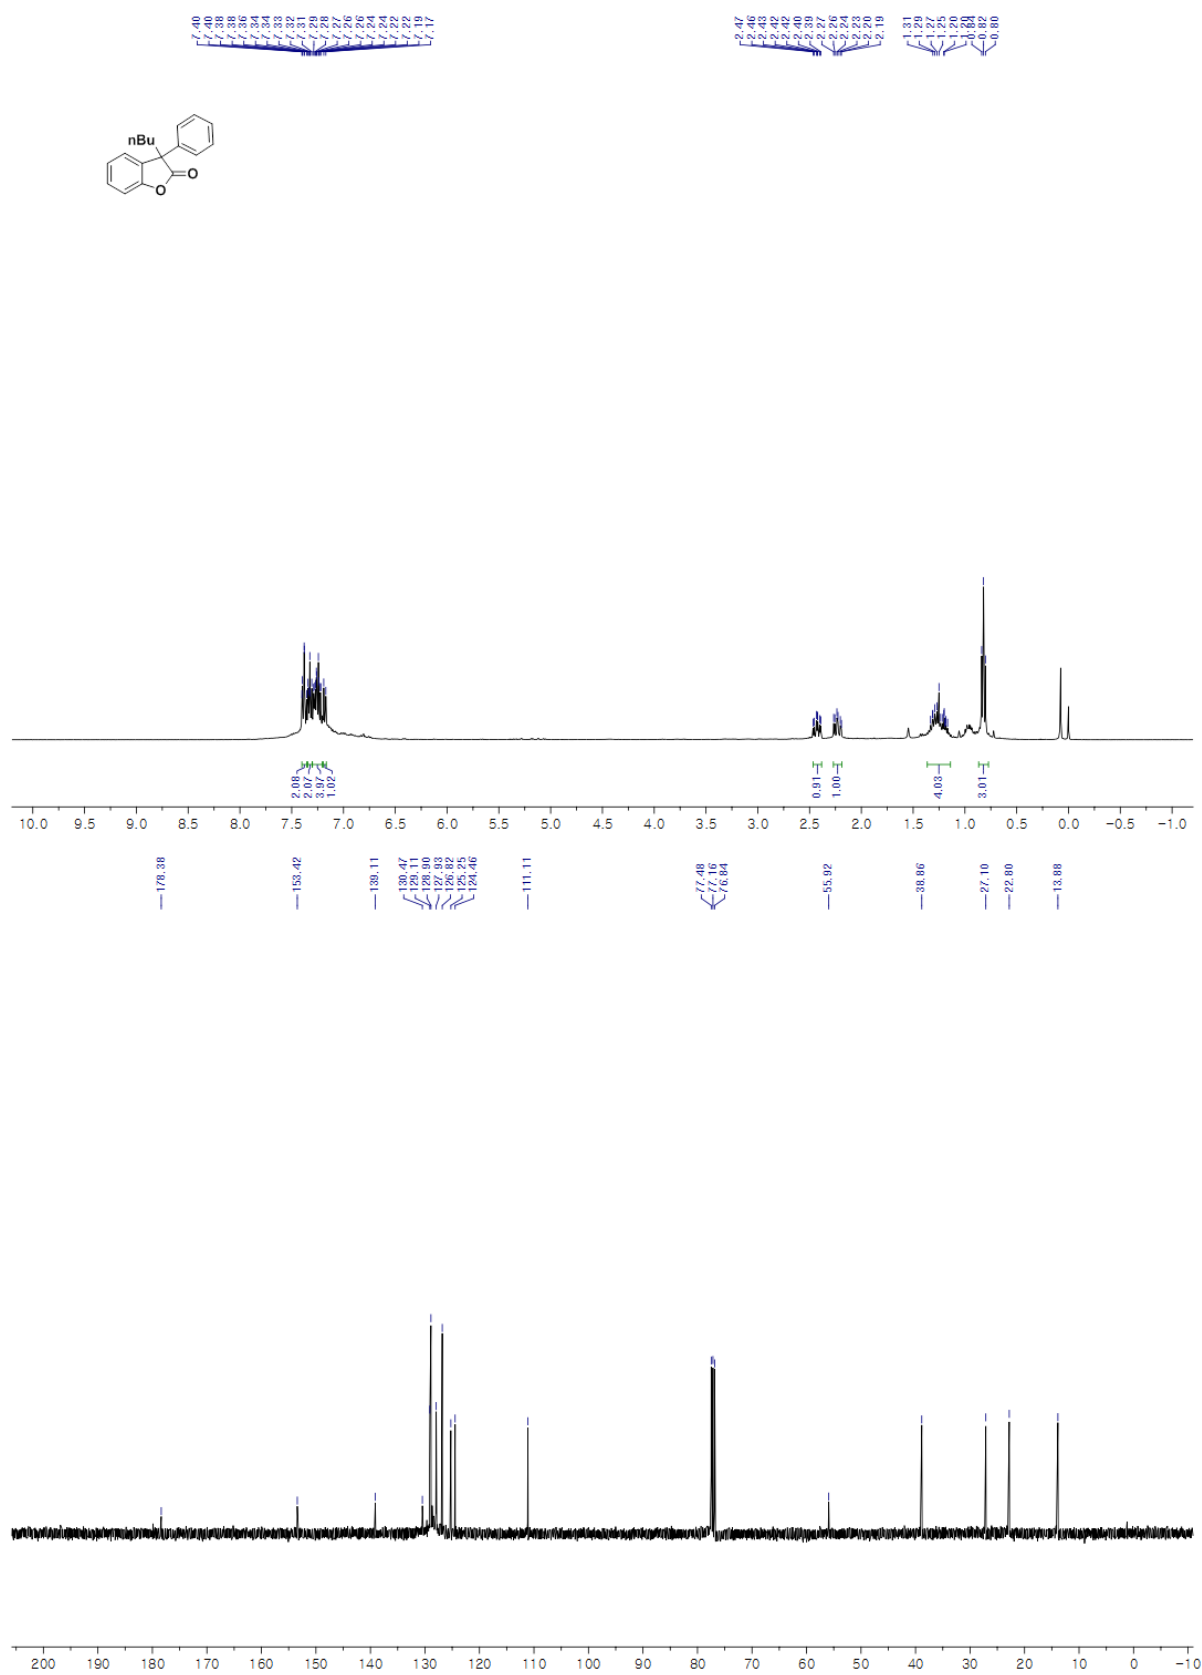

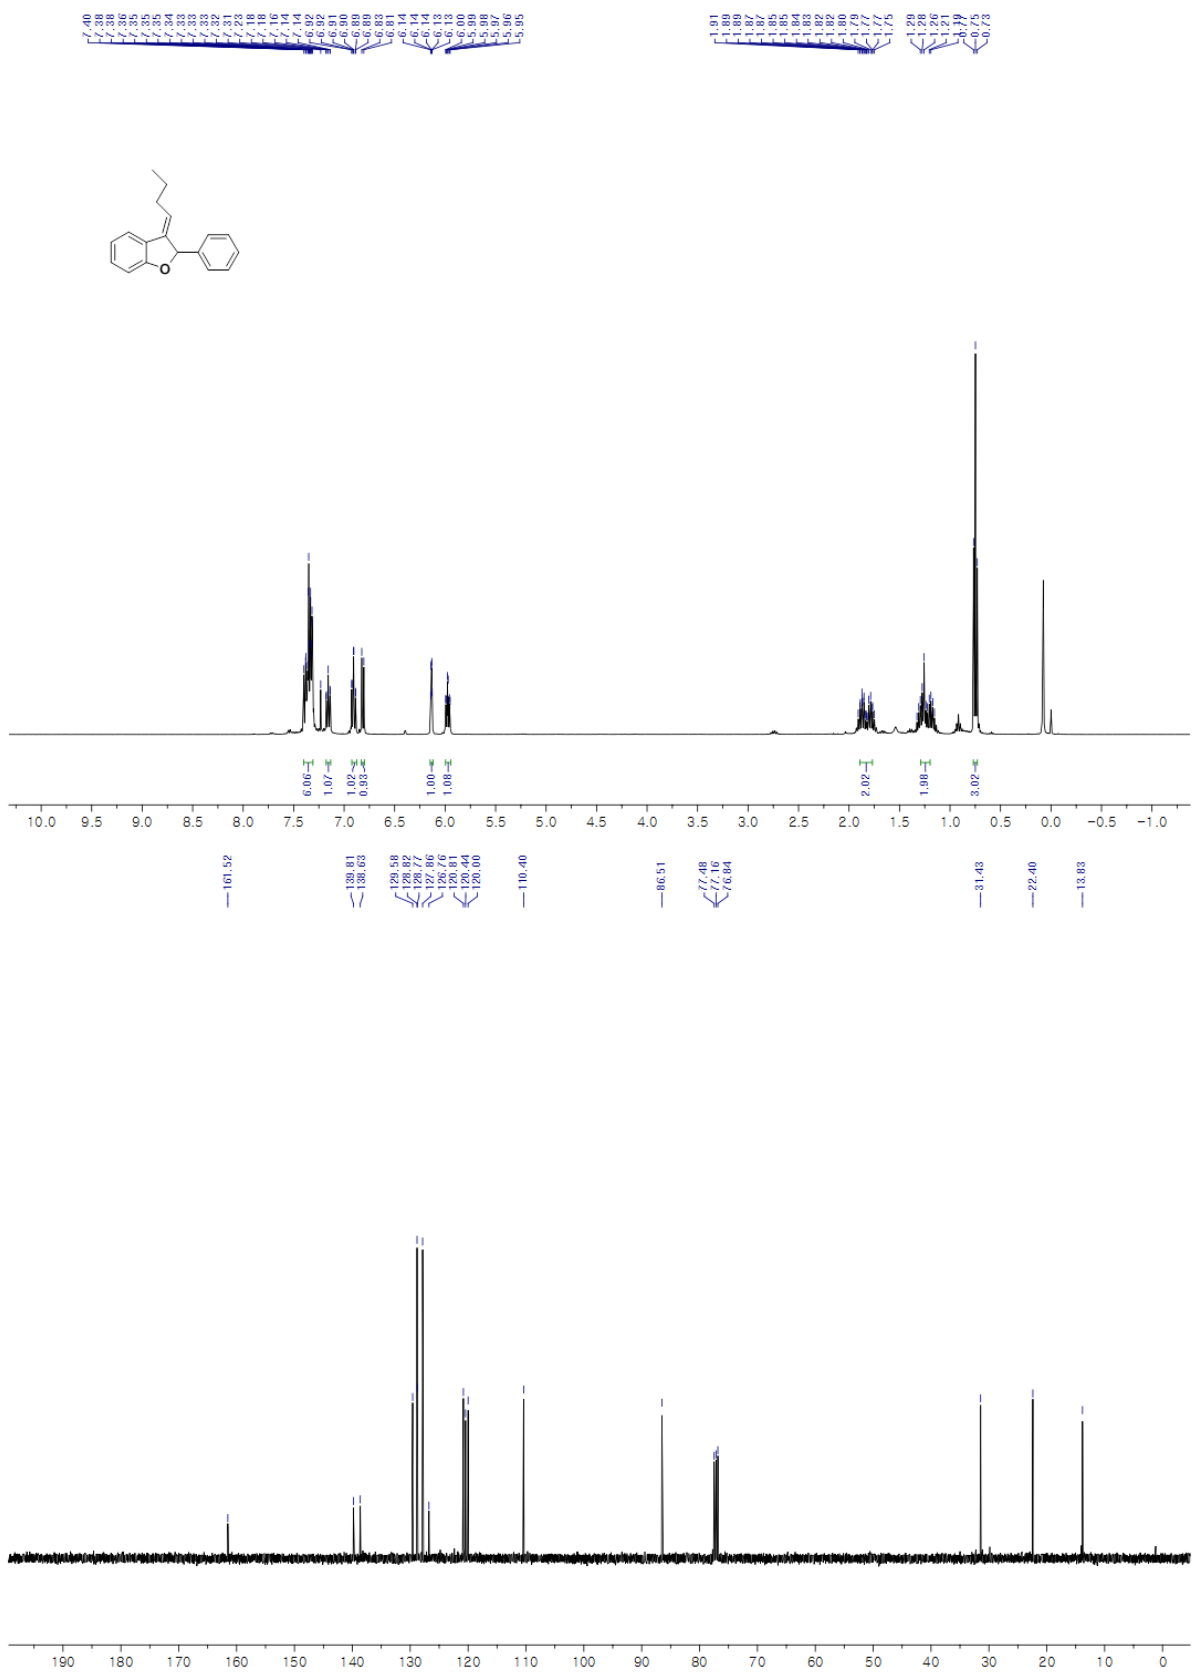

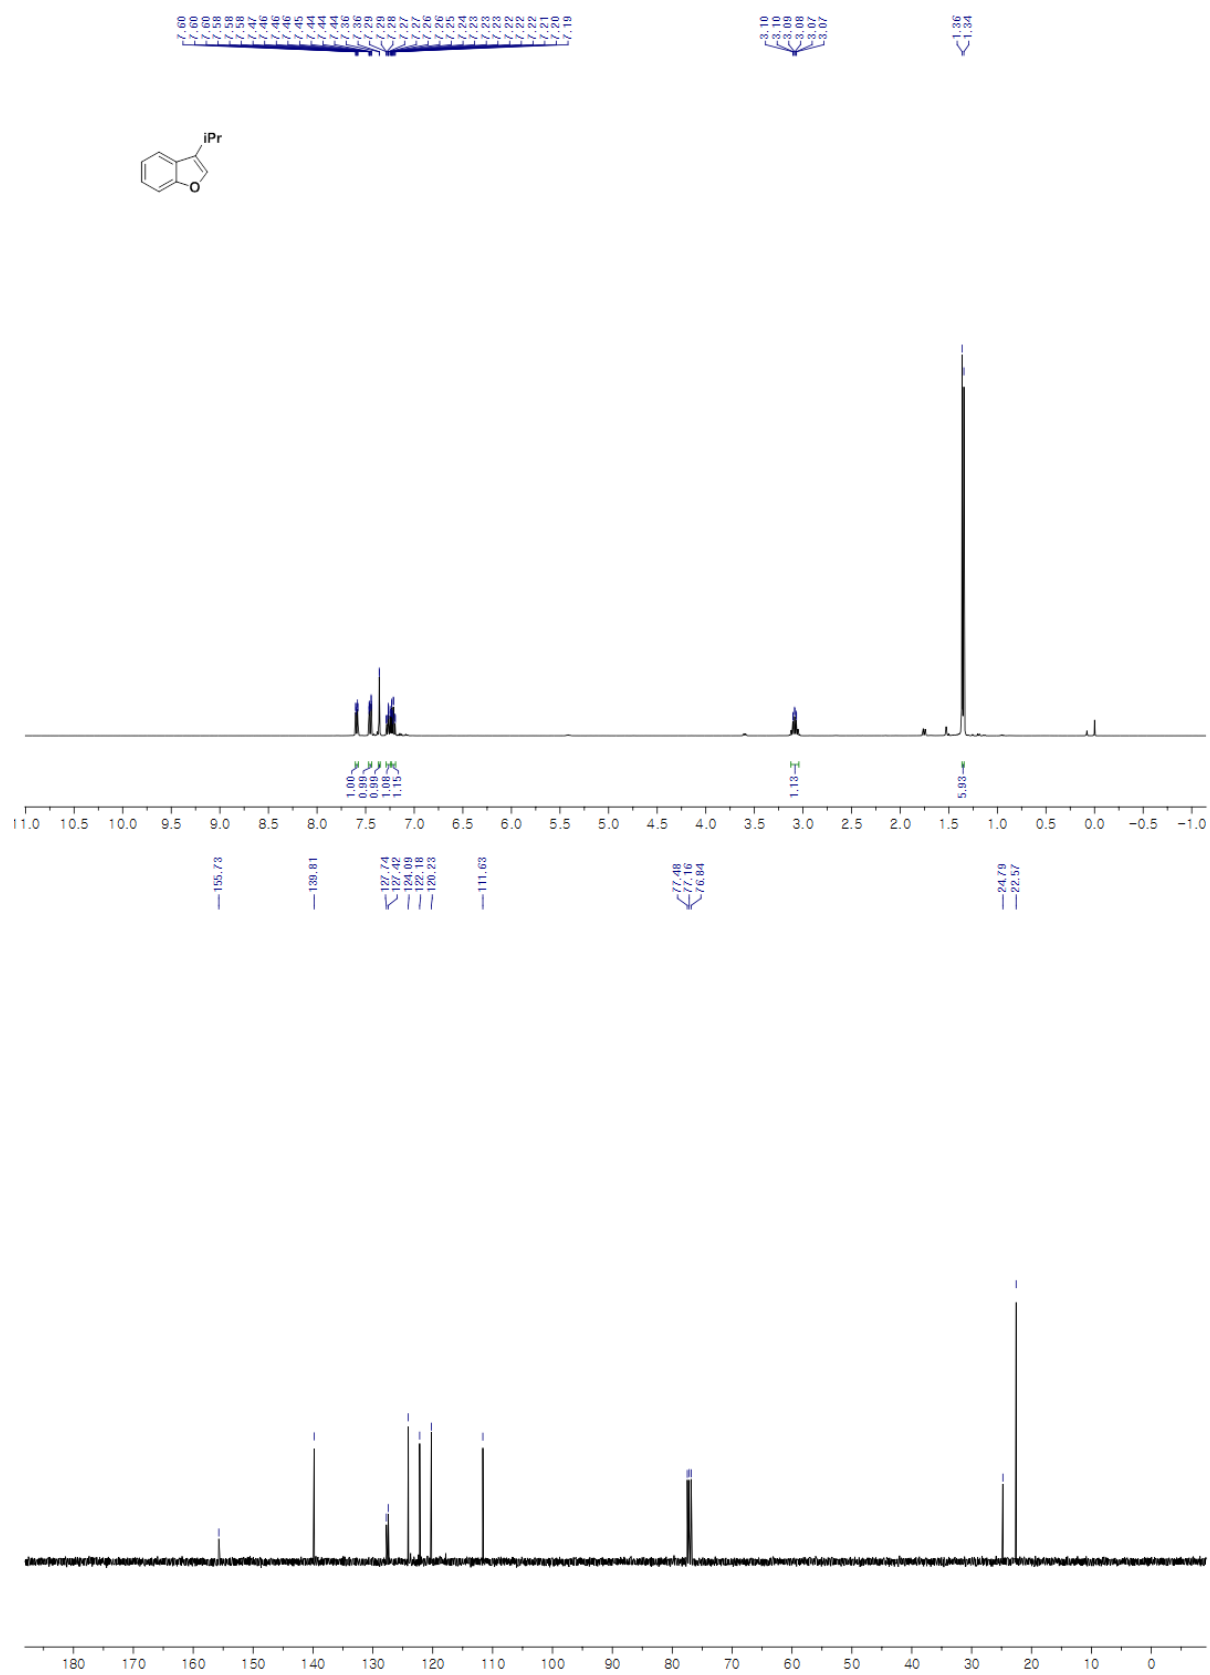

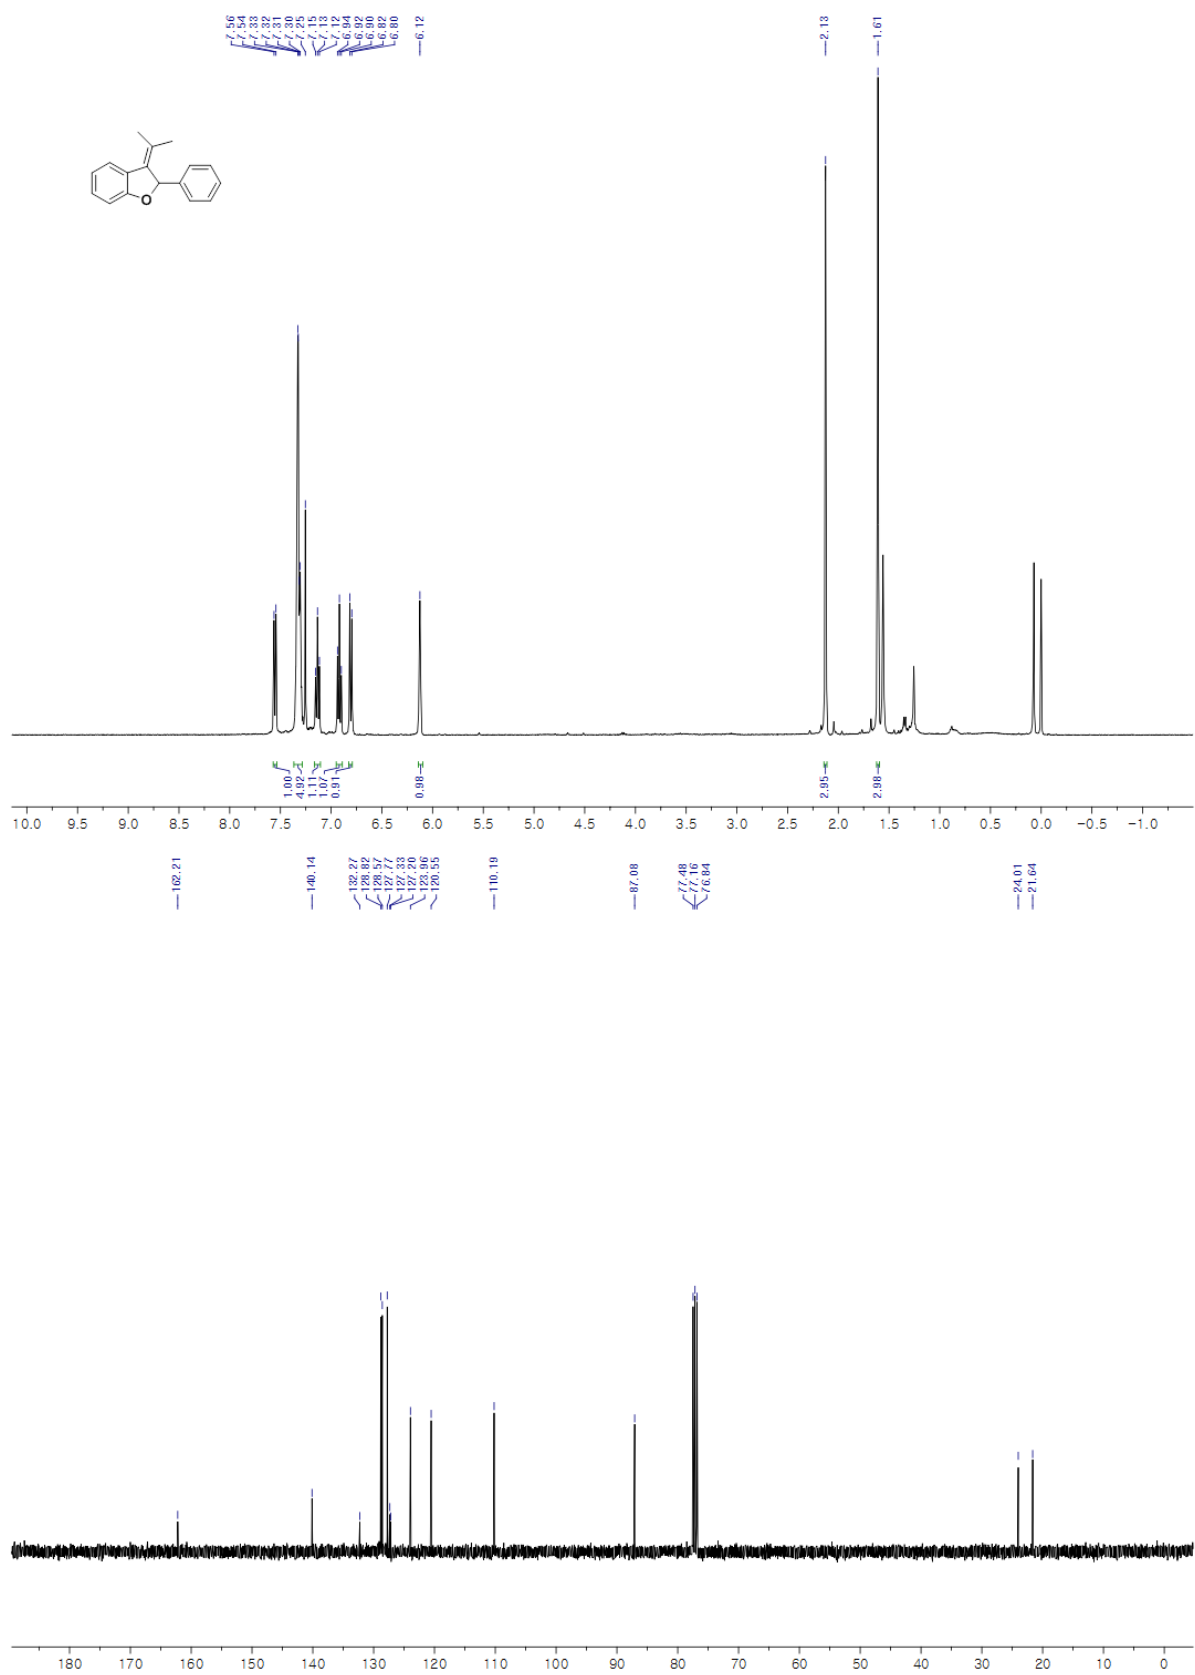

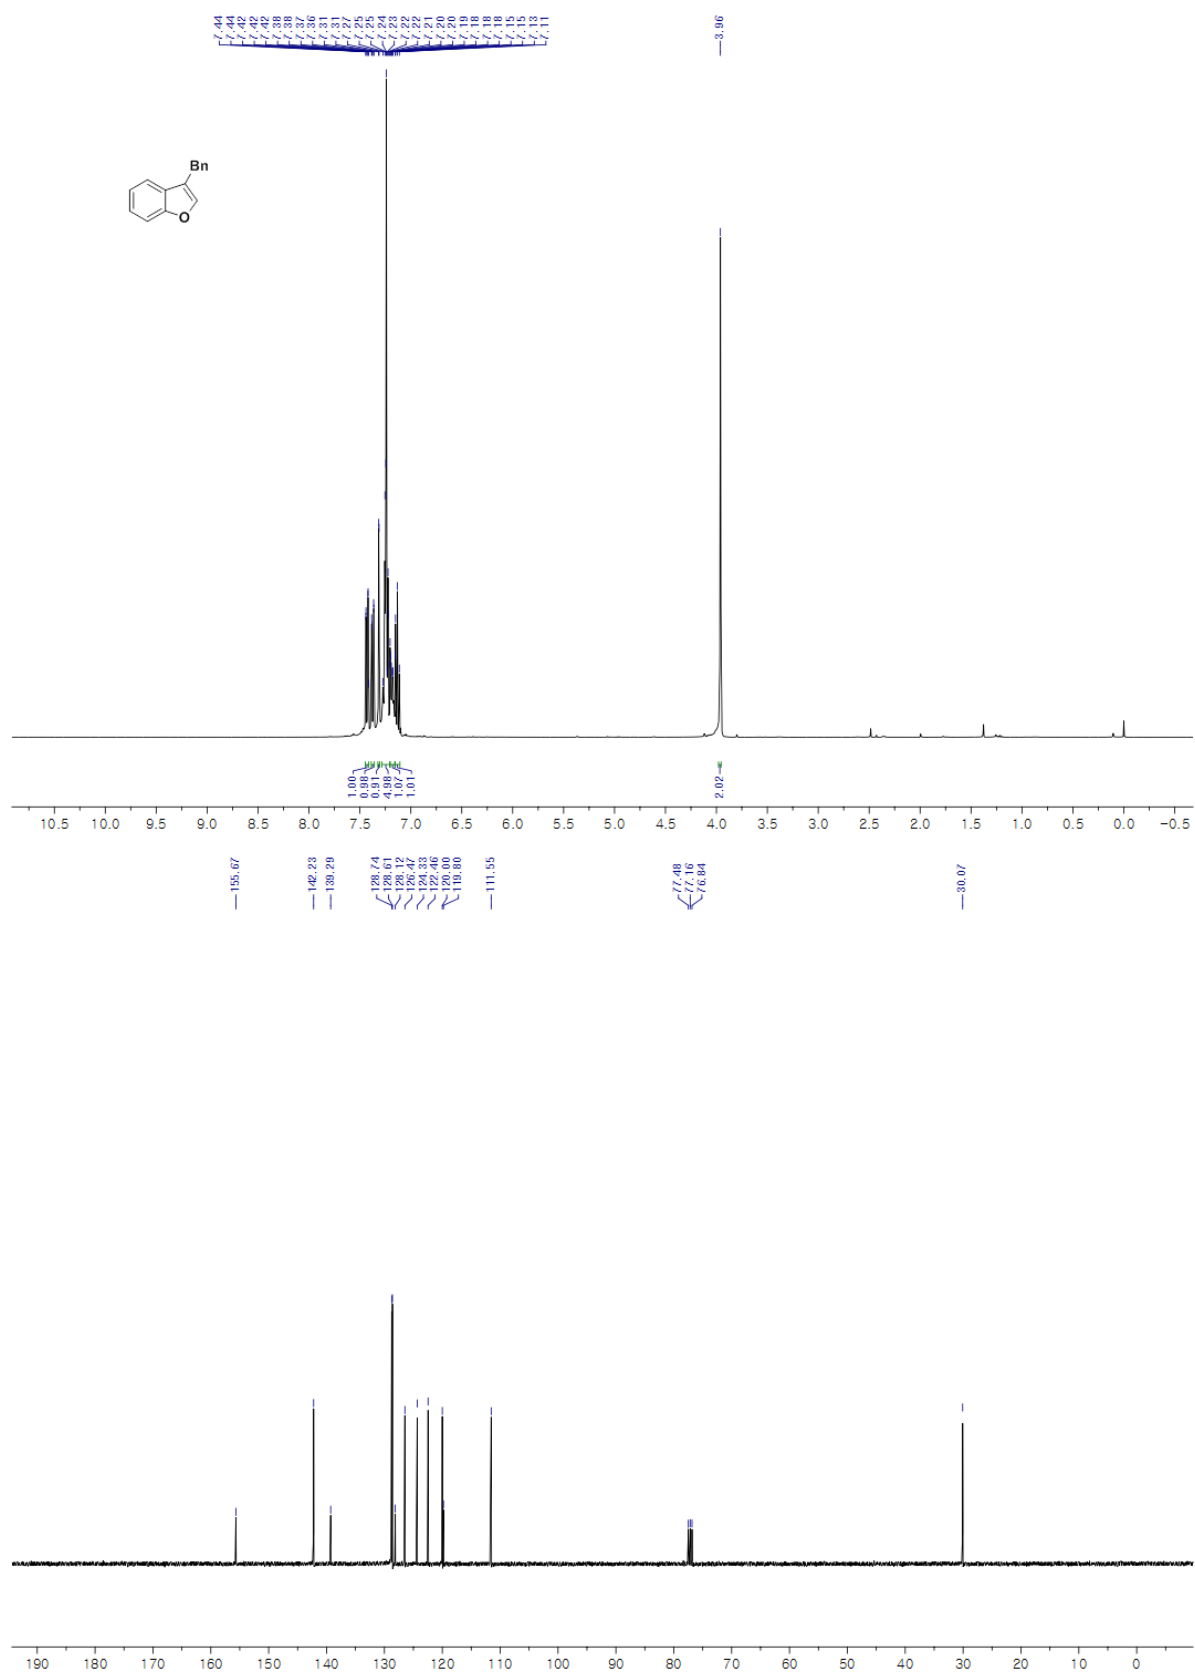

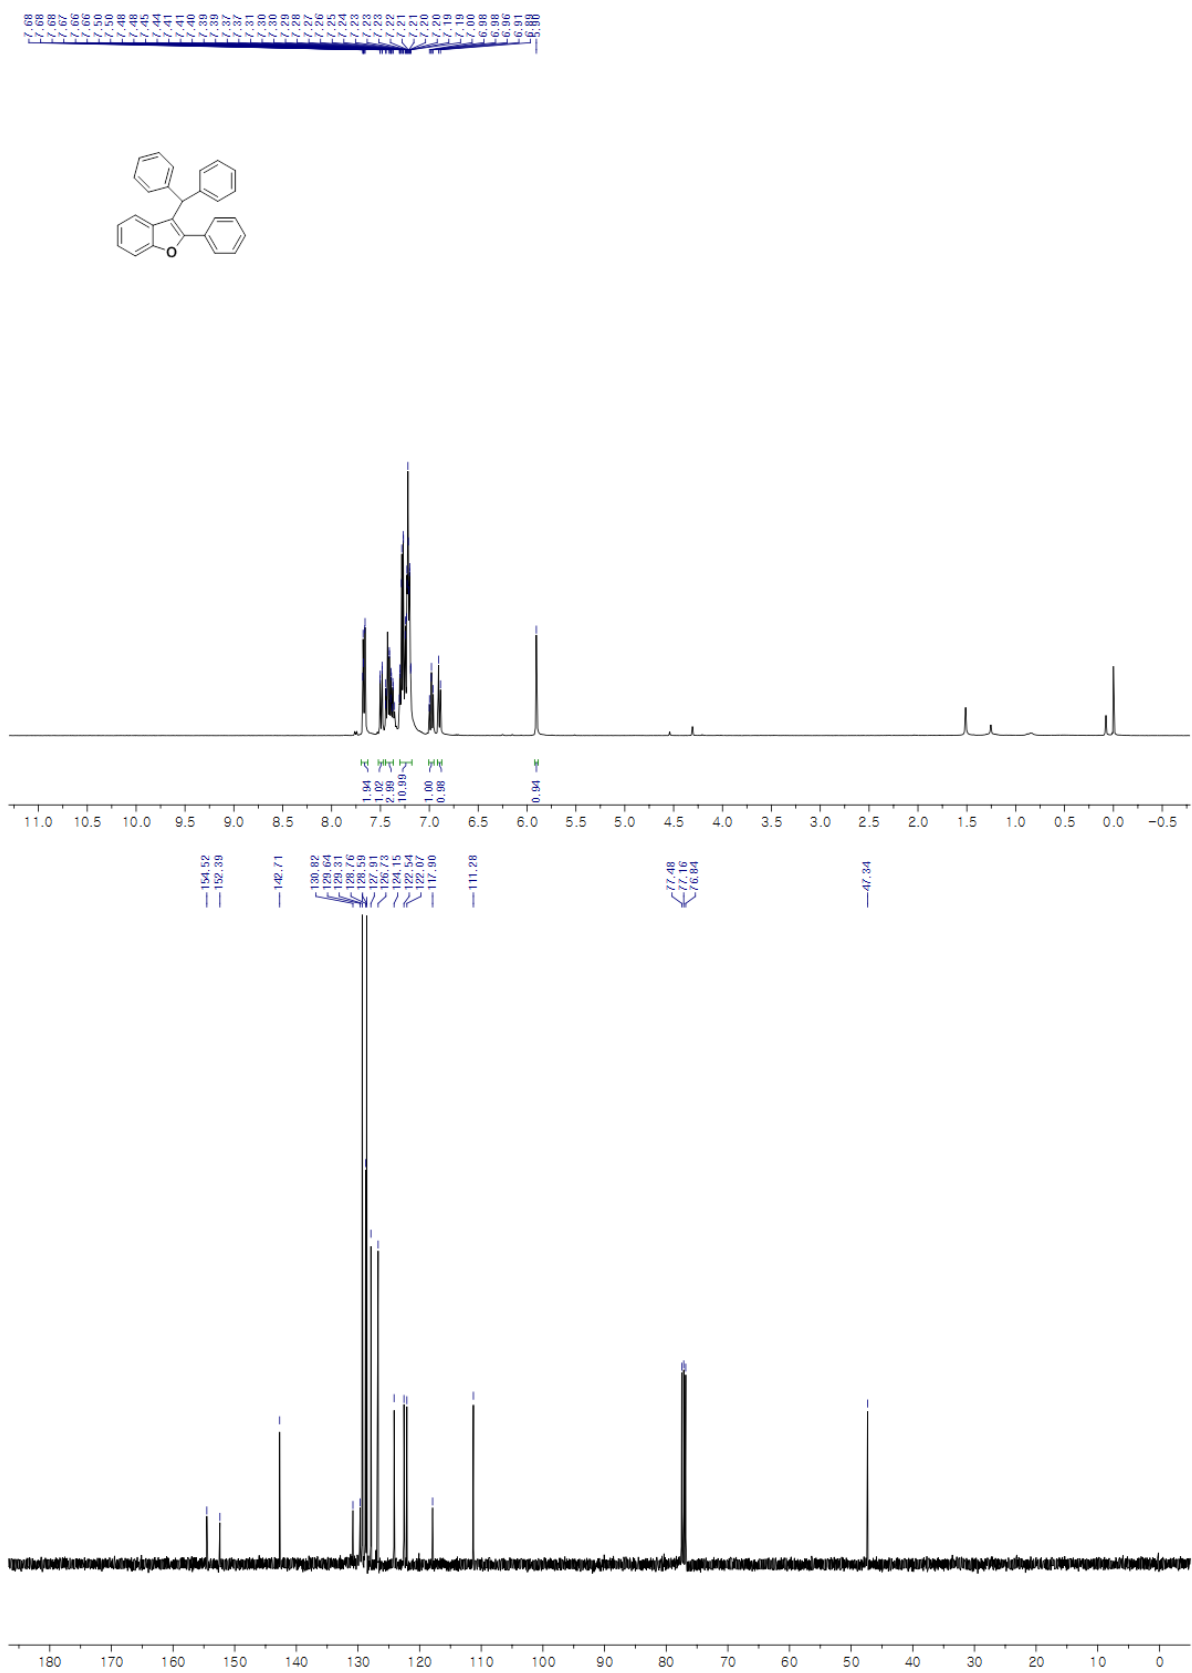



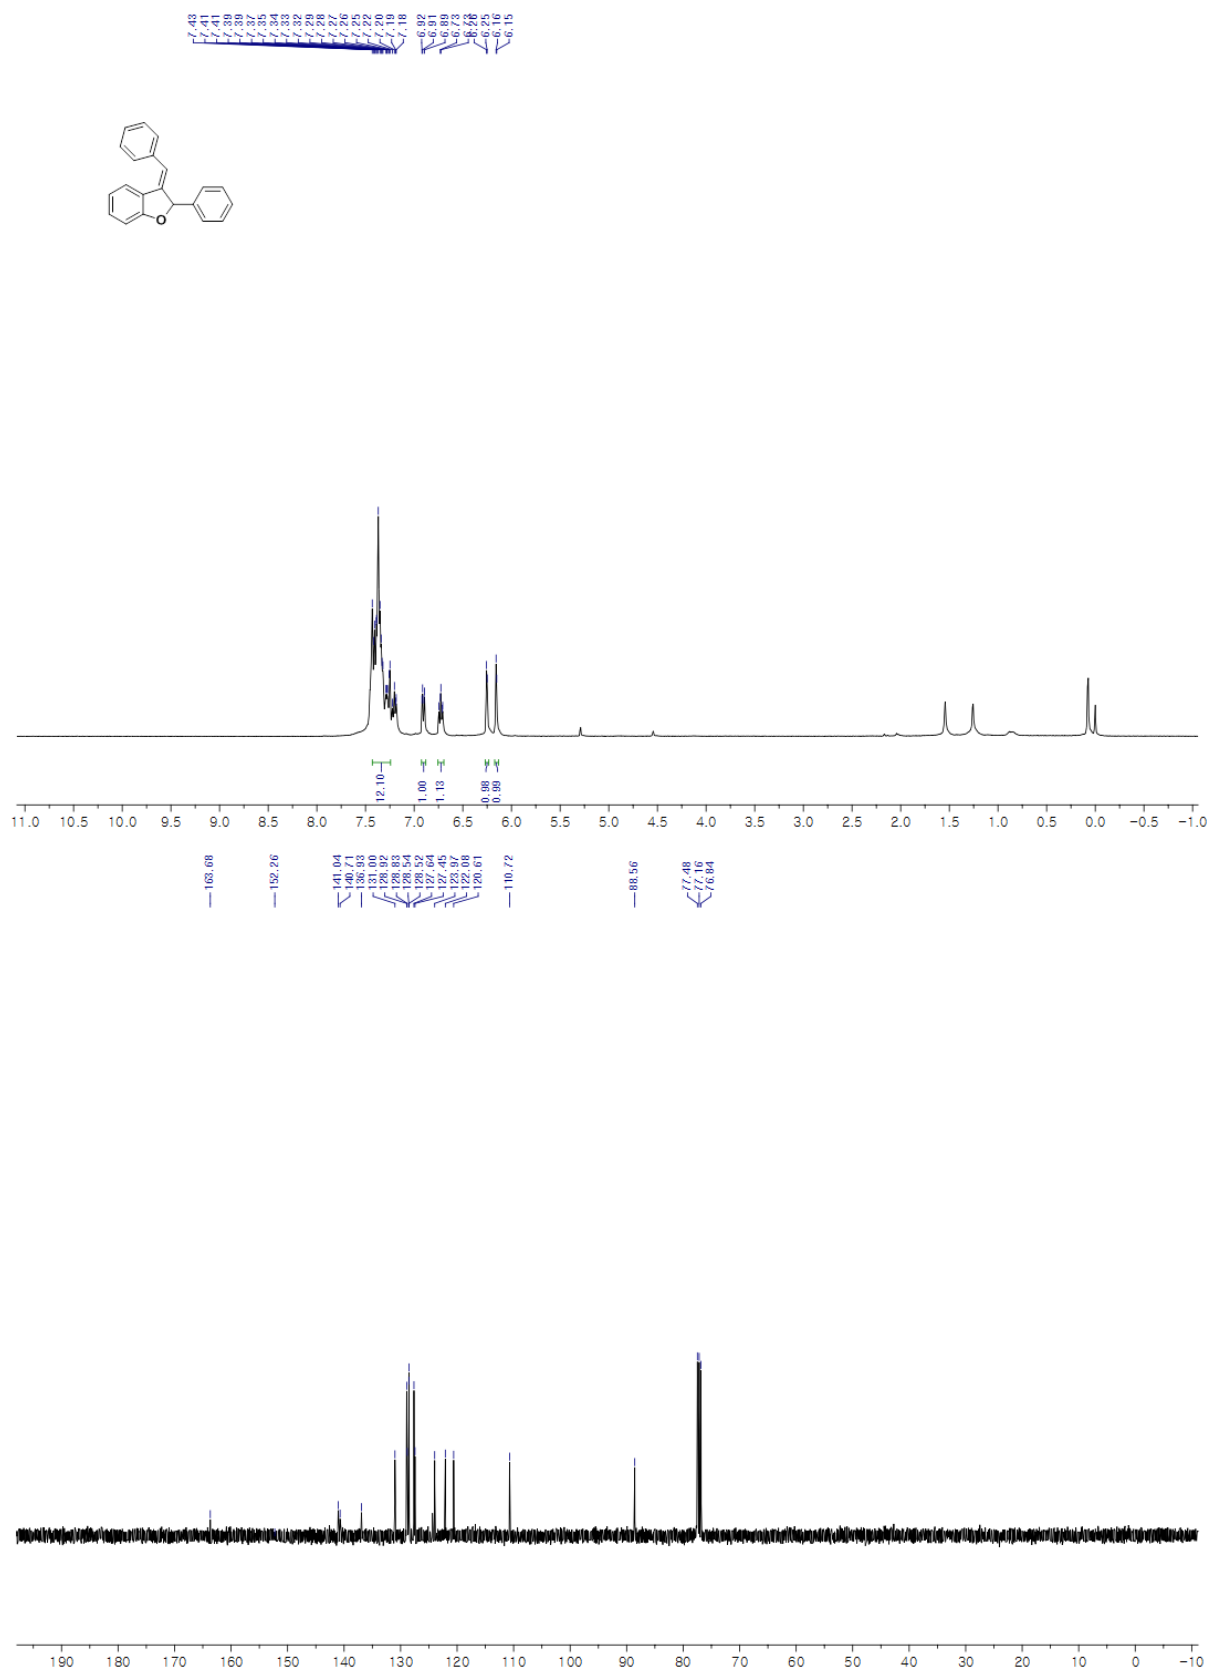

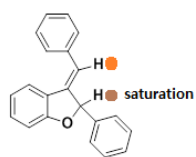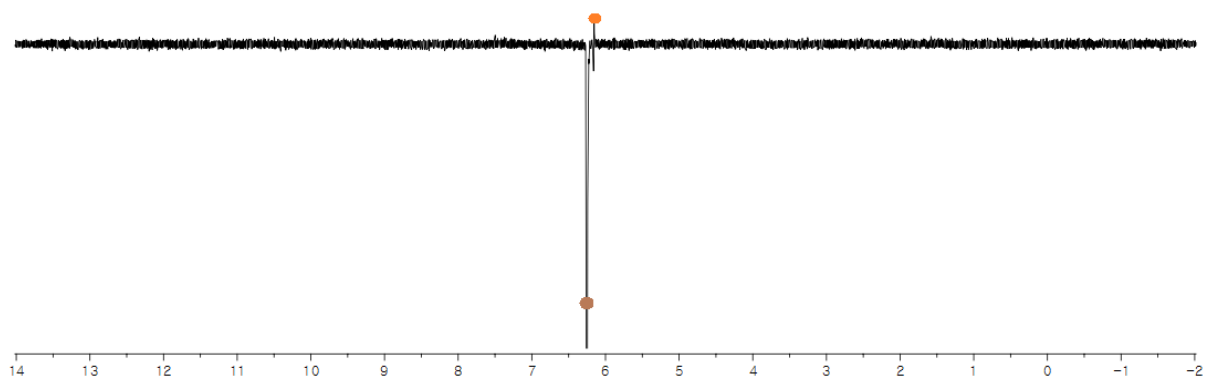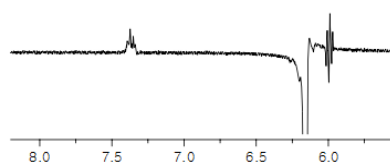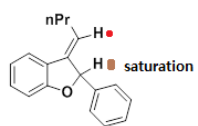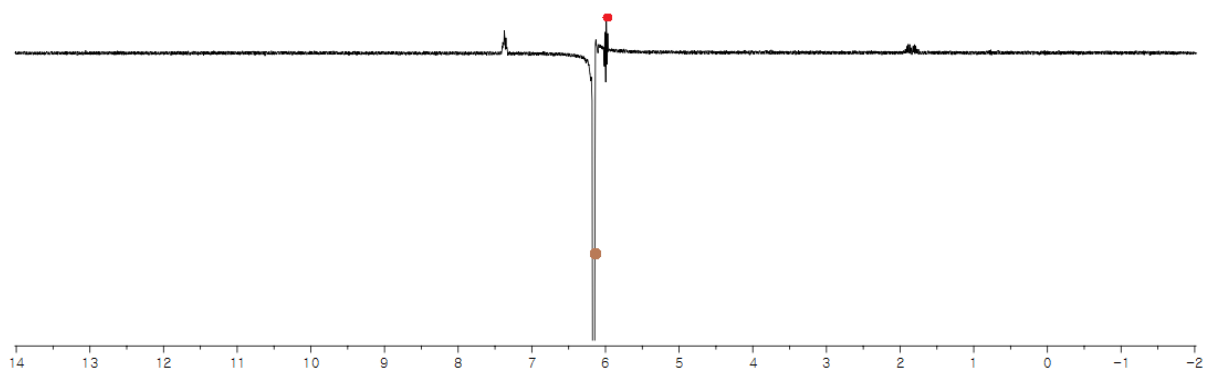

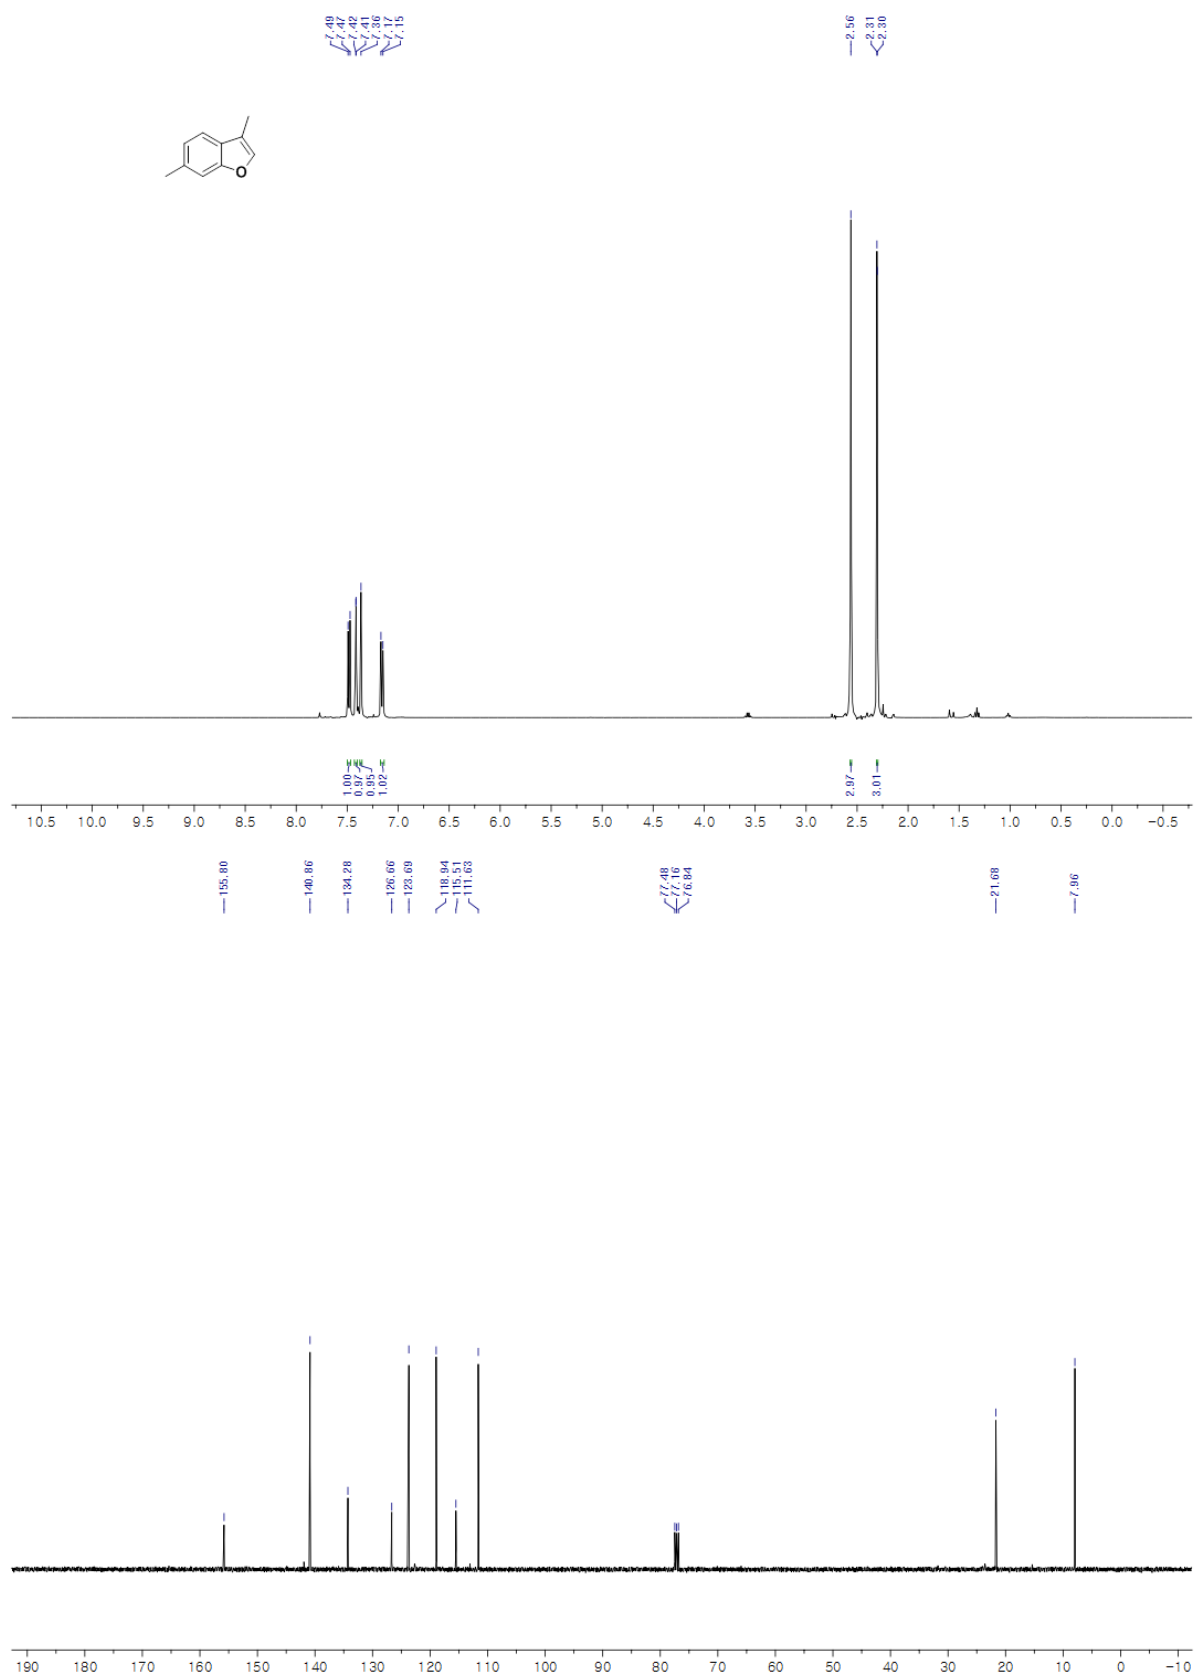

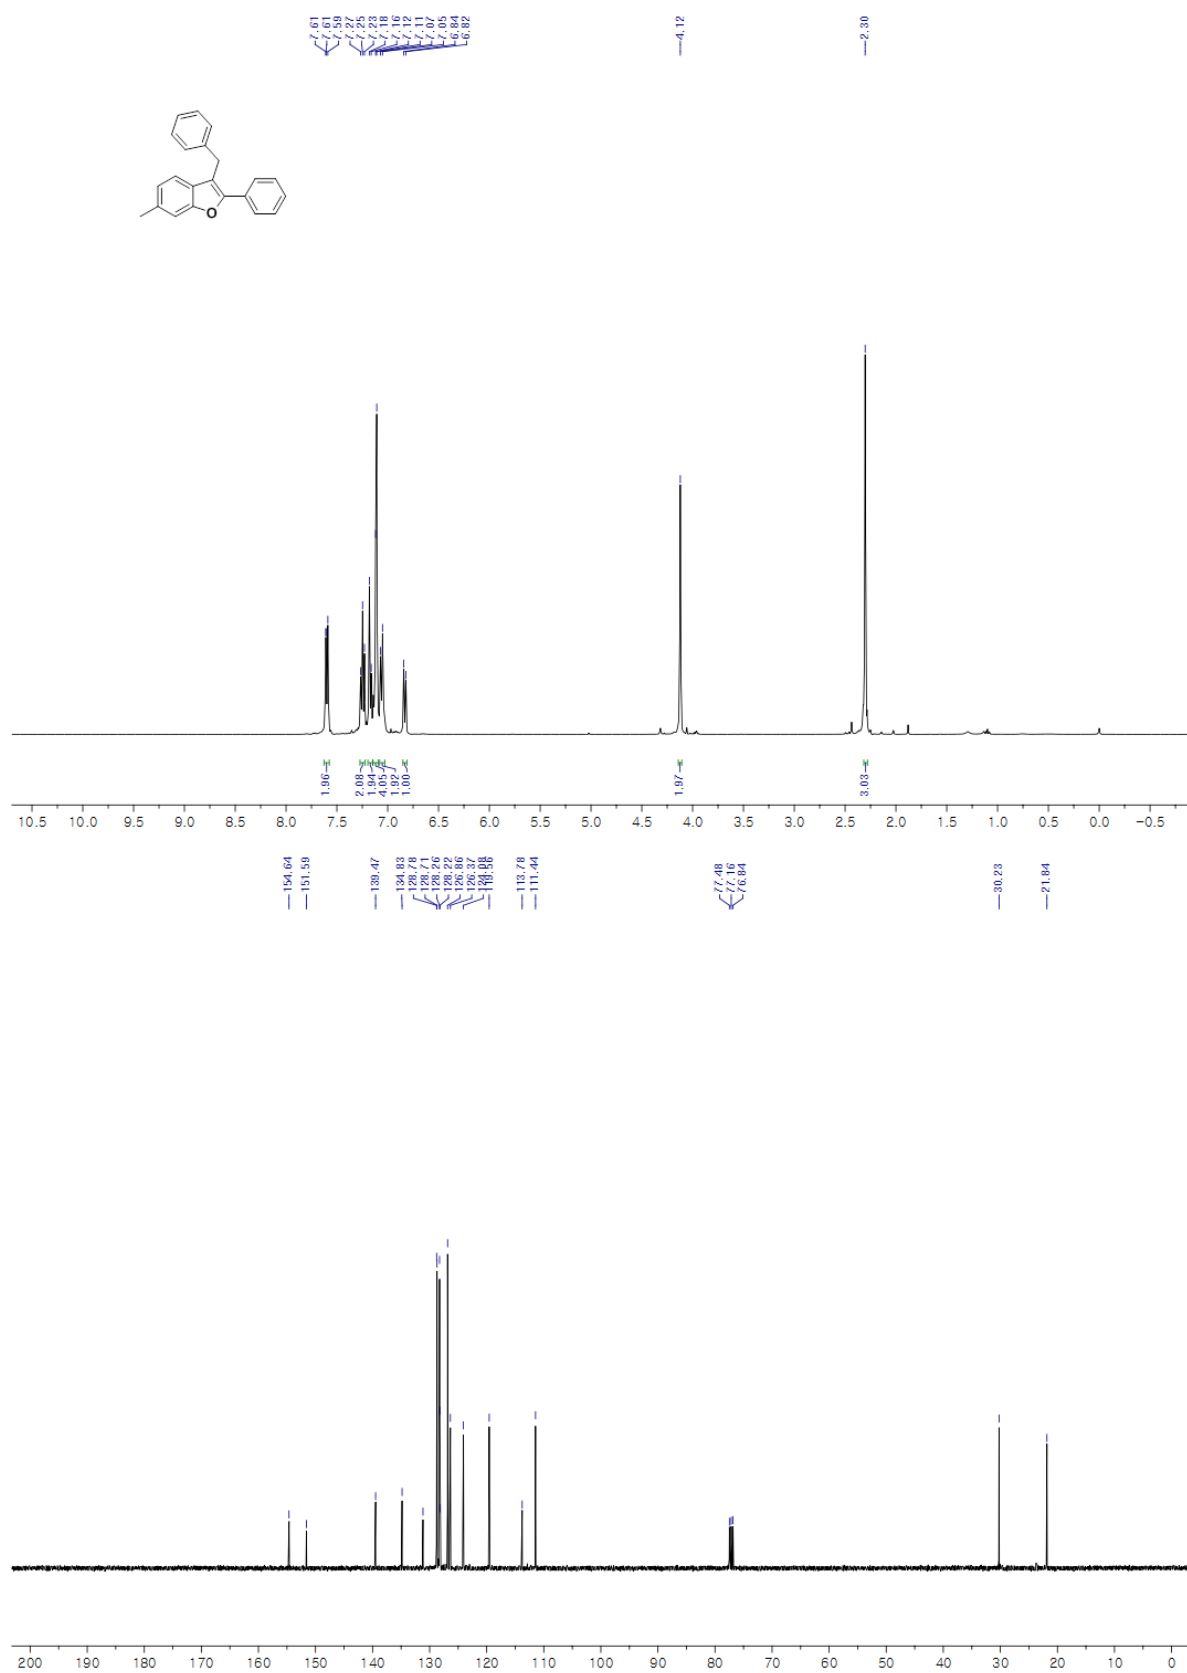

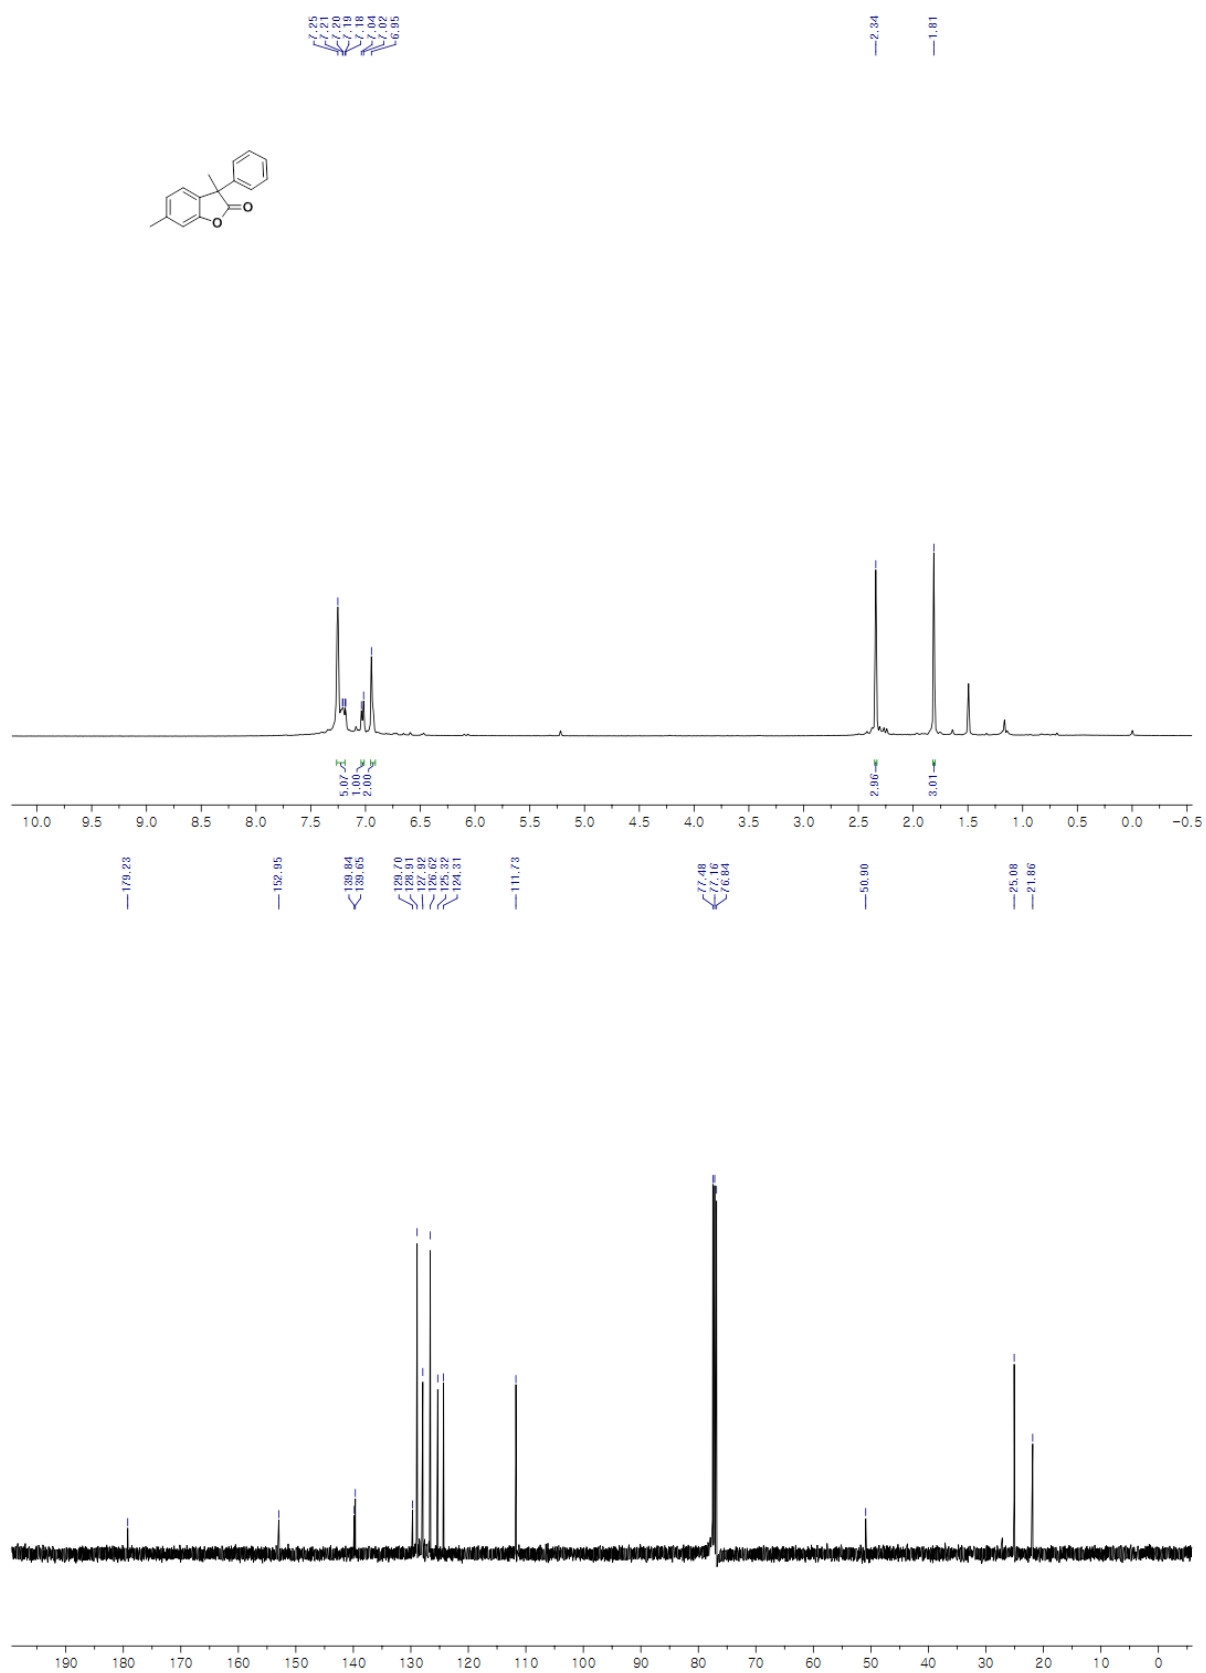

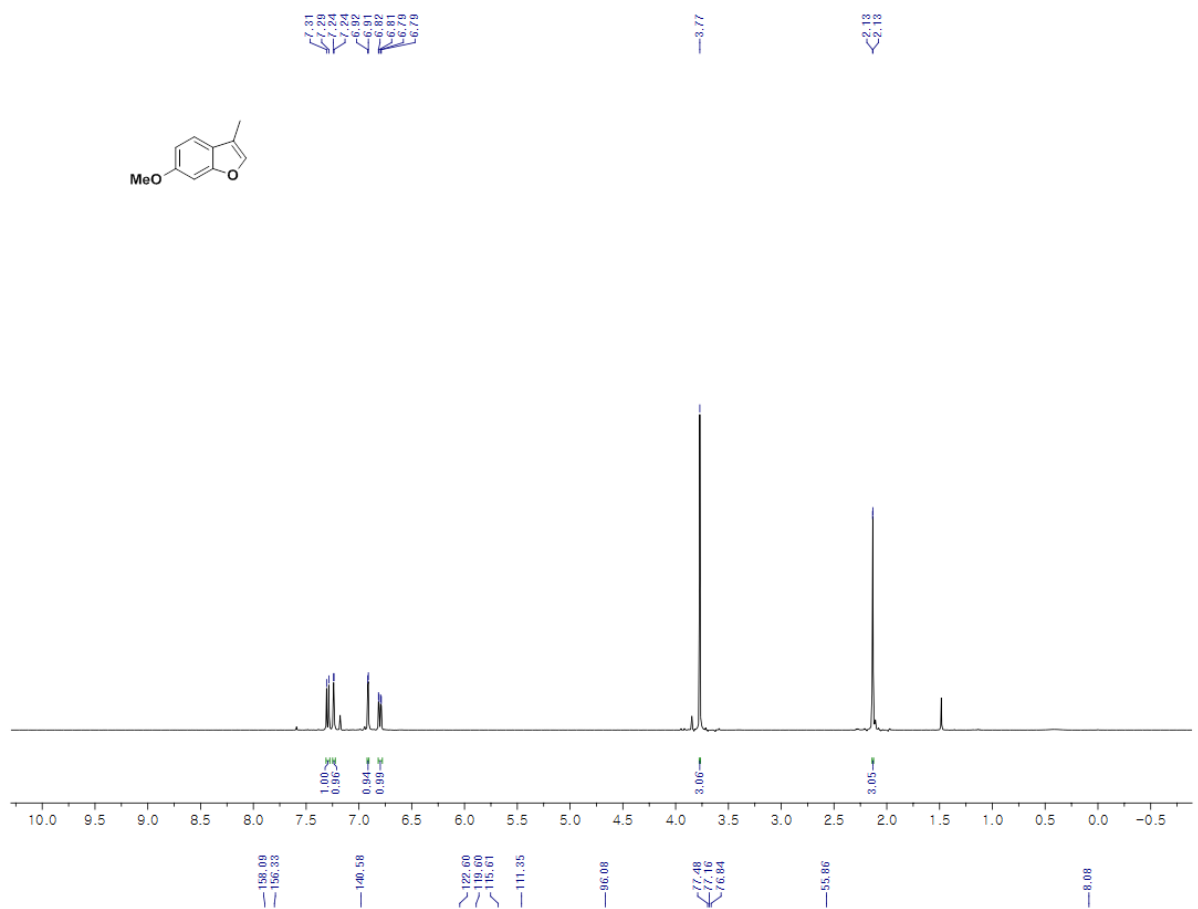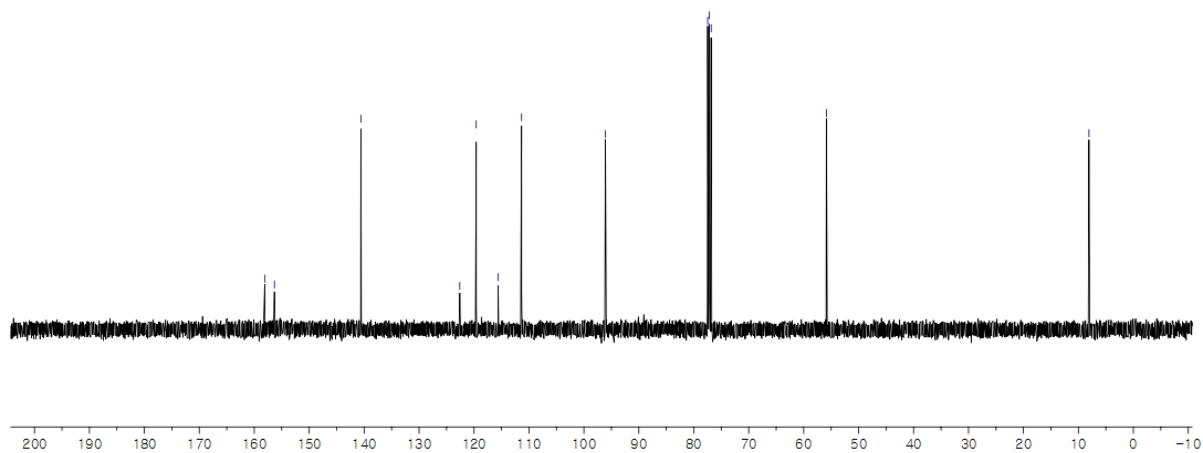

## ● Reference

1. (a) R. C. Larock, *Tetrahedron Lett.* **1988**, 29, 4687-4690. (b) N. C. O. Tomkinson, *Synlett*, **2009**, 18, 3003-3006. (c) A. Chihaya, *Chem. Commun.* **2012**, 48, 5892-5894. (d) P. Lu, C. Sanchez, J. Cornella, I. Larrosa, *Org. Lett.*, **2009**, 11, 5710 – 5713.
2. R. Grainger, A. Nikmal, J. Cornella, I. Larrosa, *Org. Biomol. Chem.* **2012**, 10, 3172-3174.
